# Supplementary material for: Monensin Alters the Functional and Metabolomic Profile of Rumen Microbiota in Beef Cattle
Source: MDPI journal article supplement (doi:10.3390/ani8110211), 2018-11-17
Supplement: s1 [file s1]

Table S1. Nutritional composition of the diet

|                      | Red clover/orchard grass hay<br>mixture | Concentrate<br>supplement |
|----------------------|-----------------------------------------|---------------------------|
| Dry matter (%)       | 92.6                                    | 89.3                      |
| NDF (% DM)           | 58.9                                    | 45.3                      |
| ADF (% DM)           | 40.2                                    | 24.4                      |
| Crude protein (% DM) | 11.4                                    | 14.3                      |
| Ether extract (% DM) | NA <sup>1</sup>                         | 2.44                      |
| Starch (% DM)        | NA                                      | 23.6                      |

NDF; neutral detergent fiber, ADF; acid detergent fiber

Concentrate contains corn gluten meal, soyhull, and cracked corn in equal proportions.

Guaranteed analysis of the mineral mix (Hubbard feeds, Mankato, MN); 8.0% calcium, 6% phosphorus, 14% magnesium, 12 ppm cobalt, 2000 ppm copper, 55 ppm iodine, 4800 ppm manganese, 36.4 ppm selenium, 4800 ppm zinc, 100,000 IU/lb vitamin A, 20,000 IU/lb vitamin D, and 250 IU/lb vitamin E.

<sup>1</sup>Not measured
