# Supplementary material for: Monensin Alters the Functional and Metabolomic Profile of Rumen Microbiota in Beef Cattle
Source: MDPI journal article supplement (doi:10.3390/ani8110211), 2018-11-17
Supplement: s1 [file s1]

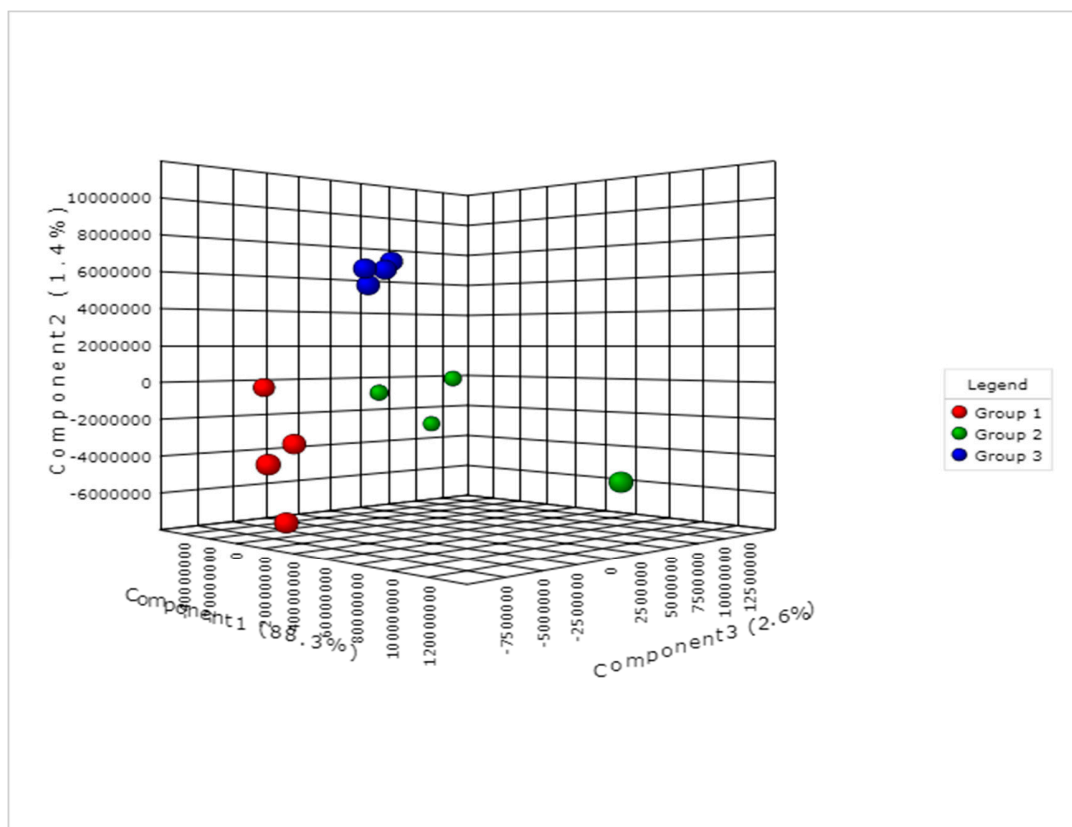

Figure S2. The scores scatter plot of the PCA model showing clustering of the quality control samples; Group 1 = Control samples, Group 2 = Monensin samples, Group 3 = Quality control samples.
