# Supplementary material for: Monensin Alters the Functional and Metabolomic Profile of Rumen Microbiota in Beef Cattle
Source: Animals (Basel). 2018 Nov 17;8(11):211. doi: 10.3390/ani8110211 (PMC6262558; doi:10.3390/ani8110211)
Supplement: Supplementary file 1 [file animals-08-00211-s001.zip]

Archive with 7 entries (7 files):
- Supplementary FigureS1.pdf
- Supplementary FigureS2.pdf
- Supplementary Table S1.pdf
- Supplementary Table S2.xlsx
- Supplementary Table S3.xlsx
- Supplementary Table S4.xlsx
- Supplementary Table S5.xlsx
