# Supplementary material for: Monensin Alters the Functional and Metabolomic Profile of Rumen Microbiota in Beef Cattle
Source: Animals (Basel). 2018 Nov 17;8(11):211. doi: 10.3390/ani8110211 (PMC6262558; doi:10.3390/ani8110211)
Supplement: Supplementary file 1 [file animals-08-00211-s001.zip › Supplementary Table S2.xlsx]

## Sheet: phylum
Classification	Average relative abundance	Standard deviation
Bacteroidetes	0.393623	0.05348
Firmicutes	0.159832	0.0197799
Proteobacteria	0.0195991	0.00916969
Euryarchaeota	0.0100552	0.00851905
Actinobacteria	0.00613693	0.000750385				CONTROL		MONENSIN
Chlamydiia	0.00449991	0.00170676				Abundance	SD	Abundance	SD
Spirochaetes	0.00438249	0.000701013			Bacteroidetes	0.352536	0.0310103	0.43471	0.0347883
Tenericutes	0.00145331	0.000737168			Firmicutes	0.168299	0.022322	0.151364	0.0149476
Clostridia	0.00142595	0.000413447			Proteobacteria	0.0236086	0.0111179	0.0155896	0.00545135
Verrucomicrobia	0.0019705	0.000991246			Euryarchaeota	0.0143094	0.0104801	0.00580091	0.0033532
Fibrobacteres	0.00103086	0.000185914			Others	0.032295	0.00454182	0.0289359	0.00479015
Fusobacteria	0.000865834	0.000164816
Synergistetes	0.000877454	0.000179482
Cyanobacteria/Melainabacteria group	0.0008587	0.000292972
Terrabacteria group	0.000745842	0.000182217
Planctomycetes	0.00122564	0.00057764
Alphaproteobacteria	0.000604697	0.00026155
Chloroflexi	0.000691618	0.000142112
Bacilli	0.000404818	0.000143073
Thermotogae	0.000292434	7.12185e-05
Bacteria	0.000348073	0.000154324
Lentisphaerae	0.000290484	8.11098e-05
Acidobacteria	0.000275627	0.000137142
Deltaproteobacteria	0.000334064	0.000154404
Deinococcus-Thermus	0.000173078	3.89872e-05
Chlorobia	0.000176819	3.11776e-05
Aquificae	0.000217083	0.000196286
Chlorobi	0.000115185	2.04135e-05
Gemmatimonadetes	0.000131082	4.86734e-05
FCB group	8.00277e-05	2.48222e-05
Chlamydiae	8.66377e-05	1.90176e-05
Deferribacteres	0.000122562	3.94678e-05
Elusimicrobia	6.62264e-05	2.82792e-05
cellular organisms	9.26117e-05	3.54569e-05
Ignavibacteriae	7.71245e-05	2.28356e-05
Armatimonadetes	6.64311e-05	4.07205e-05
Bacteroidetes/Chlorobi group	6.61631e-05	2.73249e-05
Chloroflexia	5.70777e-05	1.82942e-05
Betaproteobacteria	6.67562e-05	4.93183e-05
Thermodesulfobacteria	4.78302e-05	1.2569e-05
Nitrospirae	6.73055e-05	2.43751e-05
Chrysiogenetes	4.46817e-05	2.25306e-05
Dictyoglomi	2.58155e-05	8.42745e-06
Nitrospinae	2.28139e-05	9.80386e-06
Sphaerobacteridae	2.9901e-05	1.69104e-05
Crenarchaeota	4.18358e-05	3.20429e-05
Cyanobacteria	7.22051e-06	4.24105e-06
Micrococcales	4.22619e-06	2.81118e-06
Caldiserica	1.01609e-05	8.72455e-06
TACK group	3.56148e-06	6.91528e-06
