# Supplementary material for: Monensin Alters the Functional and Metabolomic Profile of Rumen Microbiota in Beef Cattle
Source: Animals (Basel). 2018 Nov 17;8(11):211. doi: 10.3390/ani8110211 (PMC6262558; doi:10.3390/ani8110211)
Supplement: Supplementary file 1 [file animals-08-00211-s001.zip › Supplementary Table S3.xlsx]

## Sheet: genus
Average relative abundance of taxa at the genus level
Classification	Standard deviation	Average relative abundance
Prevotella	0.0504942	0.247111
Bacteroides	0.013819	0.0663289
Lactobacillus	0.0205347	0.0136256
Alistipes	0.00405946	0.0200174
Butyrivibrio	0.00271113	0.0183525
Clostridium	0.00756568	0.016726
Phascolarctobacterium	0.00233876	0.00943017
Methanobrevibacter	0.00833702	0.00918568
Parabacteroides	0.00191112	0.00879234
Ruminococcus	0.00196225	0.010736
Oscillibacter	0.00208038	0.00655581
Propionispira	0.00167455	0.000734563
Selenomonas	0.000569641	0.00416916
Paraprevotella	0.000875414	0.0043559
Lachnoclostridium	0.00158859	0.00601906
Eubacterium	0.000643591	0.00522291
Ruminiclostridium	0.0010071	0.00475511
Chlamydia	0.00170676	0.00449991
Porphyromonas	0.000458273	0.00325335
Dysgonomonas	0.000397038	0.00297465
Odoribacter	0.000568847	0.00280738
Blautia	0.000712742	0.00362762
Oribacterium	0.000668166	0.00344412
Bacillus	0.00119159	0.00355908
Tannerella	0.000353347	0.00251916
Paludibacter	0.000541013	0.00230787
Treponema	0.000401476	0.00255749
Paenibacillus	0.000679637	0.0031022
Barnesiella	0.000738472	0.00236092
Butyricimonas	0.000292019	0.0017177
Alloprevotella	0.000305506	0.00154693
Acidaminococcus	0.000298362	0.00143664
Megasphaera	0.000231398	0.00129723
Flavobacterium	0.00019497	0.00145569
Proteiniphilum	0.000256145	0.00125603
Subdoligranulum	0.000518014	0.0018006
Streptococcus	0.000499978	0.00148483
Lentimicrobium	0.000394631	0.000986964
Hallella	0.000208566	0.00103296
Draconibacterium	0.000212562	0.00102687
Enterococcus	0.000344495	0.0012168
Acholeplasma	0.000557897	0.00112725
Anaerovibrio	0.000148697	0.000907694
Anaerovorax	0.000391232	0.00101948
Fibrobacter	0.000181507	0.00100623
Prolixibacter	0.000191773	0.000805486
Coprobacter	0.000207086	0.000983897
Rikenella	0.000216258	0.000909848
Dorea	0.000175663	0.00113631
Pseudobutyrivibrio	0.000256005	0.00102542
Dialister	0.00017273	0.000829462
Hungatella	0.000186127	0.00107323
Anaerotruncus	0.000255739	0.0010537
Pedobacter	0.000185977	0.00095803
Bifidobacterium	7.96131e-05	0.00085032
Peptoclostridium	0.000320078	0.00102081
Mucinivorans	0.000146461	0.000759429
Sanguibacteroides	0.000138695	0.000667515
Capnocytophaga	8.72301e-05	0.000715095
Roseburia	0.000249006	0.00097709
Mitsuokella	0.000122314	0.000616294
Acetivibrio	0.000239851	0.000848877
Chryseobacterium	6.0392e-05	0.000716219
Coprococcus	0.000277959	0.000980649
Marvinbryantia	0.000118556	0.00085831
Robinsoniella	0.000994386	0.00144663
Sphingobacterium	0.000105165	0.00056988
Coprobacillus	0.000266492	0.000589349
Faecalibacterium	0.000140412	0.000749147
Christensenella	0.000156952	0.000837945
Sphaerochaeta	0.000488792	0.00106842
Pelosinus	0.000144188	0.000182817
Caldicoprobacter	0.000416311	0.000909679
Anaerophaga	0.000114679	0.000544313
Catabacter	0.00017285	0.000847382
Erysipelatoclostridium	0.000196656	0.000494094
Desulfotomaculum	0.000134876	0.000595859
Slackia	0.000114053	0.000519033
Clostridiales incertae sedis	0.00017703	0.00053429
Solobacterium	0.000395561	0.000628996
Carnobacterium	0.00120716	0.000745095
Megamonas	8.209e-05	0.000235936
Anaerostipes	0.000205792	0.000567584
Desulfosporosinus	7.72116e-05	0.000563756
Marinifilum	9.58501e-05	0.000340609
Sunxiuqinia	8.41329e-05	0.00041361
Holdemania	7.87257e-05	0.000400119
Thermophagus	6.30343e-05	0.00037602
Marinilabilia	9.59339e-05	0.000374391
Desulfovibrio	9.69024e-05	0.00048761
Streptomyces	0.000239737	0.000683428
Desulfitobacterium	7.16116e-05	0.000472699
Acetobacterium	0.000131508	0.00044256
Fermentimonas	6.27941e-05	0.000416594
Alkaliflexus	4.49116e-05	0.00036214
Succinimonas	0.00018645	0.000609778
Fusobacterium	0.000115368	0.000472549
Herbinix	0.000120125	0.000423796
Lysinibacillus	9.61481e-05	0.000265658
Olsenella	6.3671e-05	0.000424852
Butyricicoccus	0.000102891	0.000478594
Hymenobacter	6.33754e-05	0.000324156
Collinsella	0.000189564	0.000442933
Spirochaeta	0.000146324	0.000418154
Sporomusa	6.4049e-05	0.000126699
Tyzzerella	6.39753e-05	0.00036153
Saccharicrinis	7.16908e-05	0.000270598
Staphylococcus	0.000163905	0.000319732
Atopobium	9.65884e-05	0.000312207
Peptoniphilus	0.000133585	0.000387643
Lachnospira	4.39213e-05	0.00031333
Campylobacter	4.28452e-05	0.000237719
Anaerococcus	8.42998e-05	0.000237823
Veillonella	8.38427e-05	0.000316908
Lachnoanaerobaculum	0.00036073	0.000608332
Caloramator	7.63599e-05	0.000331033
Shuttleworthia	5.78337e-05	0.000307534
Kandleria	9.03404e-05	0.0002013
Geofilum	6.73047e-05	0.000262026
Sinorhizobium	0.000268128	0.000362967
Turicibacter	6.36446e-05	0.000216462
Erysipelothrix	7.48227e-05	0.000222557
Leptotrichia	3.81079e-05	0.000202079
Algoriphagus	5.2938e-05	0.000247619
Flavihumibacter	5.62779e-05	0.000192865
Xanthomonas	3.80805e-05	0.000249
Eggerthia	5.47192e-05	0.000157536
Cellulosilyticum	6.75635e-05	0.000316377
Syntrophomonas	4.67148e-05	0.000233613
Mucilaginibacter	3.57652e-05	0.00022145
Runella	5.50925e-05	0.000242948
Actinomyces	5.12474e-05	0.000203073
Pyramidobacter	6.42028e-05	0.000252867
Caldicellulosiruptor	7.19167e-05	0.000254809
Catenibacterium	9.3269e-05	0.000201931
Geobacillus	8.49129e-05	0.000250825
Solitalea	3.64797e-05	0.000161583
Brevibacillus	7.46282e-05	0.000255199
Aquimarina	2.31802e-05	0.000198776
Dyadobacter	9.45899e-05	0.00027153
Dielma	0.000155922	0.000233637
Acinetobacter	0.00911681	0.00562972
Oxobacter	8.66632e-05	0.0002443
Stomatobaculum	4.43764e-05	0.000213547
Lentisphaera	8.11098e-05	0.000290484
Lactococcus	6.68474e-05	0.000240837
Pseudomonas	9.54458e-05	0.0003143
Vibrio	0.000288897	0.000400154
Sharpea	3.28933e-05	0.000155087
Verrucomicrobium	0.000263979	0.000423485
Synergistes	4.37543e-05	0.00023533
Burkholderia	0.000319697	0.000419466
Pontibacter	5.47348e-05	0.000214865
Spirosoma	3.39933e-05	0.000172899
Alkaliphilus	4.09418e-05	0.000244439
Mycoplasma	0.000122948	0.000200703
Terrimicrobium	0.000141169	0.000292449
Ethanoligenens	9.53041e-05	0.000255339
Thermoanaerobacter	4.83207e-05	0.000224591
Gorillibacterium	4.16369e-05	0.000169851
Leadbetterella	3.96137e-05	0.000176572
Sporocytophaga	3.8765e-05	0.000174389
Dehalobacter	8.55909e-05	0.000272271
Mahella	0.000109214	0.000299779
Rufibacter	2.13336e-05	0.000180584
Elizabethkingia	4.52533e-05	0.00024033
Eggerthella	2.47022e-05	0.000174628
Arthrobacter	2.82088e-05	0.000110775
Olivibacter	3.63902e-05	0.000129471
Propionispora	3.74768e-05	9.51095e-05
Leuconostoc	0.000340876	0.000281703
Mogibacterium	5.08716e-05	0.00021116
Trichococcus	3.27299e-05	0.000158152
Opitutus	7.69983e-05	0.000220792
Geobacter	6.83402e-05	0.000225971
Zunongwangia	2.68773e-05	9.00714e-05
Caedibacter	5.08707e-05	4.57628e-05
Desulfobulbus	3.06067e-05	0.000161223
Caloranaerobacter	3.45574e-05	0.000177806
Defluviitaleaceae	4.31075e-05	0.000158291
Thermotalea	4.36887e-05	0.000174683
Niabella	5.56762e-05	0.00016943
Helicobacter	4.92873e-05	0.000205722
Youngiibacter	4.30896e-05	0.000163575
Catonella	4.77191e-05	0.000187617
Thermoanaerobacterium	4.92647e-05	0.000186208
Segetibacter	3.42267e-05	0.000107301
Wolbachia	6.34016e-05	6.35853e-05
Lewinella	3.31013e-05	0.000157995
Roseivirga	3.3972e-05	0.000131053
Pseudoramibacter	9.67248e-05	0.000223762
Succinivibrio	2.45202e-05	0.000153619
Pedosphaera	0.000128665	0.000260739
Flexilinea	3.74366e-05	0.000179547
Anaeromusa	4.65024e-05	7.64332e-05
Flammeovirga	2.68819e-05	0.000145705
Succinispira	2.739e-05	9.25263e-05
Lacinutrix	2.08229e-05	0.000107024
Flexithrix	5.01515e-05	0.000131311
Methanobacterium	0.000134691	0.00023779
Terrisporobacter	5.41347e-05	0.000169646
Smithella	2.69392e-05	0.000126001
Brachyspira	2.6358e-05	0.000126663
Syntrophobotulus	4.31547e-05	0.000117683
Chlorobium	1.90783e-05	0.000128019
Lachnobacterium	4.31697e-05	0.00017897
Diplosphaera	0.000149127	0.00024713
Anaeroarcus	3.33336e-05	4.96624e-05
Pseudopedobacter	2.65672e-05	0.000108786
Ruminobacter	0.00020471	0.000310938
Pseudobacteroides	7.46356e-05	0.000192329
Rhodopirellula	0.000150559	0.000289346
Microbacterium	2.02096e-05	0.000121584
Anoxybacillus	3.90568e-05	0.000136665
Azospirillum	4.99537e-05	8.37193e-05
Tepidanaerobacter	1.78647e-05	0.000124941
Sphingomonas	4.57461e-05	0.000126442
Faecalicoccus	2.11711e-05	8.29555e-05
Akkermansia	0.000118983	0.000251012
Aneurinibacillus	1.52166e-05	0.000140307
Alicyclobacillus	3.25276e-05	0.00015635
Haliscomenobacter	3.02171e-05	0.000107971
Maribacter	2.42801e-05	0.00010516
Spiroplasma	5.49436e-05	8.54747e-05
Sediminibacterium	2.1601e-05	0.000111067
Flexibacter	2.65299e-05	0.000105409
Allobaculum	1.85401e-05	0.000117144
Oceanobacillus	4.48565e-05	9.3324e-05
Pediococcus	8.15982e-05	7.70036e-05
Tenacibaculum	2.29145e-05	0.00010425
Anaerosporomusa	1.77975e-05	6.88203e-05
Listeria	6.91506e-05	0.000197029
Cyclobacterium	5.2338e-05	0.000140527
Riemerella	2.23321e-05	8.51069e-05
Myroides	2.08024e-05	0.000145199
Planctomyces	0.000146455	0.000234522
Owenweeksia	3.32492e-05	0.000110839
Faecalitalea	3.80209e-05	0.000105597
Nonlabens	1.44301e-05	0.000115459
Hassallia	2.55995e-05	7.0996e-05
Cytophaga	1.69453e-05	0.000101348
Leeuwenhoekiella	1.63626e-05	8.39731e-05
Virgibacillus	3.42275e-05	0.000107722
Fretibacterium	3.4768e-05	0.00011798
Mangrovimonas	2.61522e-05	0.000119096
Leptospira	5.07007e-05	0.000115201
Gardnerella	6.0585e-05	0.000107018
Moorella	3.07587e-05	0.000132747
Aequorivita	2.21733e-05	6.11469e-05
Chthoniobacter	0.000116484	0.000203901
Pirellula	3.73321e-05	0.000136823
Sutterella	0.000161004	0.000242946
Massilia	6.87127e-05	0.000103988
Anaerofustis	0.00013601	0.000182359
Finegoldia	2.2619e-05	8.96814e-05
Parvimonas	2.39465e-05	0.000101337
Acetonema	2.66633e-05	0.000106044
Kiloniella	4.00253e-05	4.04545e-05
Exiguobacterium	3.1244e-05	9.23272e-05
Cohnella	2.96577e-05	0.000134322
Lunatimonas	2.55378e-05	6.4781e-05
Thermobrachium	3.08552e-05	0.000106254
Anaerolinea	4.53348e-05	0.000130794
Caldanaerobius	6.43323e-05	0.000151504
Haloferula	9.56704e-05	0.00020395
Mageeibacillus	1.80612e-05	6.01237e-05
Leptolyngbya	0.000124388	0.00013491
Thermonema	2.48222e-05	8.00277e-05
Phaeodactylibacter	2.01638e-05	8.89192e-05
Polaribacter	1.5696e-05	8.67244e-05
Adhaeribacter	2.10011e-05	4.72585e-05
Fervidicella	3.10924e-05	0.000104576
Muricauda	1.22314e-05	6.42086e-05
Enterobacter	2.35873e-05	0.000112259
Nafulsella	2.03383e-05	7.52604e-05
Chitinophaga	1.03954e-05	9.5682e-05
Arenibacter	3.36121e-05	9.82553e-05
Niastella	2.54716e-05	9.40389e-05
Peptostreptococcus	5.99843e-05	0.000132933
Oceanibaculum	2.87099e-05	3.1613e-05
Enterorhabdus	7.17945e-05	0.000161831
Microbispora	1.98795e-05	7.09192e-05
Epilithonimonas	1.92544e-05	8.29452e-05
Leucobacter	1.06917e-05	8.07429e-05
Leptolinea	1.61826e-05	6.06191e-05
Deinococcus	2.39435e-05	9.74538e-05
Thermosinus	1.78273e-05	6.20812e-05
Echinicola	3.73688e-05	0.00010069
Bradyrhizobium	3.82332e-05	0.000127453
Skermanella	2.86874e-05	3.5509e-05
Photobacterium	2.25988e-05	6.93641e-05
Thermosipho	2.39363e-05	4.23643e-05
Holdemanella	3.36794e-05	8.53268e-05
Moraxella	0.000141583	0.00016955
Corynebacterium	1.53635e-05	8.98785e-05
Holospora	2.79764e-05	2.36255e-05
Bulleidia	1.66918e-05	6.53363e-05
Gemmatimonas	3.79189e-05	9.98121e-05
Thalassospira	6.65531e-05	6.66978e-05
Planococcus	1.79656e-05	4.78111e-05
Cecembia	1.68702e-05	4.72869e-05
Senegalimassilia	1.62237e-05	6.21711e-05
Clostridiisalibacter	1.31268e-05	7.66179e-05
Persicobacter	1.66192e-05	7.24063e-05
Centipeda	1.62265e-05	5.61207e-05
Winogradskyella	1.17409e-05	6.08593e-05
Rickettsia	2.28449e-05	2.65033e-05
Psychroflexus	1.07488e-05	8.60212e-05
Desulfuromonas	4.38189e-05	0.000133413
Fulvivirga	1.40635e-05	5.91884e-05
Empedobacter	0.00017821	0.000182674
Haemophilus	6.5863e-05	8.30077e-05
Marinobacter	1.97916e-05	7.55727e-05
Thermococcus	1.95724e-05	4.56726e-05
Desulfosarcina	4.04255e-05	9.7853e-05
Thalassobacillus	1.3674e-05	3.95644e-05
Bartonella	4.70938e-05	5.36078e-05
Gemella	5.72189e-05	8.63861e-05
Bilophila	5.38633e-05	0.000127586
Flaviramulus	2.15362e-05	5.64576e-05
Orenia	1.54351e-05	5.04421e-05
Johnsonella	1.03296e-05	5.9799e-05
Alloscardovia	5.10007e-05	0.00011053
Dethiobacter	2.62135e-05	8.69688e-05
Desulfonatronum	1.99373e-05	6.25788e-05
Methanosarcina	2.69647e-05	9.96141e-05
Sporosarcina	4.12499e-05	9.6337e-05
Faecalibaculum	2.29182e-05	6.66988e-05
Caldanaerobacter	2.9347e-05	9.43035e-05
Legionella	1.89911e-05	7.18252e-05
Desulfitibacter	2.94868e-05	8.21095e-05
Helcococcus	1.44223e-05	6.24427e-05
Robiginitalea	1.28856e-05	4.41647e-05
Fibrisoma	2.4855e-05	7.77719e-05
Gordonibacter	8.27141e-06	6.14202e-05
Gracilimonas	1.6632e-05	3.89892e-05
Shewanella	1.53809e-05	8.16246e-05
Nocardia	4.38258e-05	6.39003e-05
Caulobacter	2.66929e-05	7.37559e-05
Escherichia	0.000140203	0.000156823
Cellulophaga	1.65456e-05	6.77823e-05
Pseudoalteromonas	2.35403e-05	7.6167e-05
Cellulomonas	1.6111e-05	5.47879e-05
Dehalococcoides	3.74234e-05	0.000109588
Arcobacter	3.74619e-05	7.43402e-05
Stenotrophomonas	3.38674e-05	8.0865e-05
Psychroserpens	1.10612e-05	6.16343e-05
Chloroherpeton	1.52126e-05	6.02691e-05
Caldisalinibacter	2.65442e-05	8.90386e-05
Aureispira	2.11762e-05	8.08741e-05
Crocinitomix	1.81052e-05	7.06936e-05
Microscilla	1.30051e-05	6.45329e-05
Desulfobacter	3.56617e-05	7.27328e-05
Halobacillus	1.68709e-05	4.13585e-05
Ureibacillus	1.59506e-05	5.70941e-05
Gemmata	4.01828e-05	9.31738e-05
Marivirga	1.71873e-05	6.72048e-05
Elusimicrobium	2.4829e-05	4.02841e-05
Cetobacterium	1.13597e-05	5.83038e-05
Kosmotoga	6.89773e-06	3.88306e-05
Thermincola	4.02667e-05	7.3879e-05
Rudanella	1.81169e-05	5.74358e-05
Mycobacterium	3.86736e-05	0.000110274
Holophaga	1.16558e-05	4.64676e-05
Flectobacillus	1.80748e-05	7.25262e-05
Mesoflavibacter	1.51282e-05	3.58863e-05
Rhizobium	3.65208e-05	0.000102011
Dokdonia	1.69843e-05	4.64865e-05
Methylobacterium	3.75255e-05	7.50977e-05
Carboxydothermus	7.51603e-06	4.20656e-05
Proteiniclasticum	2.59916e-05	8.40043e-05
Desulfatibacillum	2.28915e-05	7.15273e-05
Gillisia	1.13815e-05	6.7467e-05
Fluviicola	1.7507e-05	5.25923e-05
Emticicia	1.46015e-05	5.53065e-05
Schleiferia	1.55429e-05	5.4963e-05
Terasakiella	3.94186e-05	3.60588e-05
Trueperella	4.71356e-06	4.00253e-05
Asticcacaulis	1.22011e-05	3.53238e-05
Ornithobacterium	7.28821e-06	5.5926e-05
Cupriavidus	1.96502e-05	6.1366e-05
Ornithinibacillus	1.08596e-05	3.2574e-05
Pyrinomonas	2.44731e-05	6.76303e-05
Mariniradius	1.63222e-05	3.65952e-05
Ralstonia	2.28077e-05	5.44074e-05
Anaerosalibacter	2.41437e-05	7.75332e-05
Actinobacillus	9.65134e-05	7.90954e-05
Thiothrix	1.55039e-05	3.97197e-05
Pelobacter	2.71441e-05	7.60316e-05
Apibacter	8.50686e-06	5.39929e-05
Gracilibacillus	2.20268e-05	5.45629e-05
Marinobacterium	0.000273982	0.000266082
Novosphingobium	0.000134593	0.000106857
Sorangium	2.52453e-05	7.63087e-05
Kordia	1.29249e-05	5.68708e-05
Terrimonas	3.17287e-05	7.55127e-05
Magnetospirillum	5.80692e-05	8.57352e-05
Kurthia	9.38777e-05	7.08119e-05
Formosa	1.13629e-05	5.69872e-05
Thermoactinomyces	4.2914e-05	7.85863e-05
Terriglobus	0.000146952	0.000124515
Methanocorpusculum	8.63072e-06	5.22603e-05
Syntrophus	8.57883e-06	3.16697e-05
Phaeospirillum	2.68876e-05	4.16706e-05
Thermus	1.48474e-05	4.11505e-05
Cryobacterium	1.31693e-05	2.03383e-05
Mesorhizobium	5.59521e-05	0.000111628
Blastopirellula	4.19662e-05	8.9402e-05
Cloacibacillus	1.1203e-05	5.63965e-05
Sebaldella	3.04637e-05	6.27166e-05
Zobellia	1.33988e-05	6.53573e-05
Vitellibacter	1.1164e-05	3.34814e-05
Syntrophaceticus	1.49623e-05	5.95521e-05
Aphanocapsa	1.8193e-05	3.45306e-05
Rubritalea	1.55457e-05	5.45181e-05
Desulfotignum	1.54817e-05	3.72768e-05
Sporolactobacillus	2.56201e-05	6.222e-05
Oxalobacter	4.8296e-05	7.78422e-05
Fictibacillus	4.7118e-05	7.95405e-05
Pelotomaculum	2.97683e-05	7.46407e-05
Bdellovibrio	9.83267e-06	4.22599e-05
Neisseria	2.63152e-05	7.66082e-05
Salinicoccus	1.10017e-05	3.73294e-05
Gracilibacter	2.60181e-05	6.43469e-05
Fervidicola	5.41451e-06	5.1326e-05
Aeromonas	0.000220829	0.000177325
Salmonella	1.6754e-05	5.18381e-05
Tamlana	1.85081e-05	4.21915e-05
Anditalea	1.10911e-05	3.72983e-05
Weeksella	2.88473e-05	6.01779e-05
Nitrosomonas	7.00345e-05	8.06002e-05
Olleya	1.07646e-05	3.61184e-05
Leifsonia	6.64359e-06	3.55401e-05
Gramella	1.37921e-05	5.50569e-05
Chromobacterium	4.93183e-05	6.67562e-05
Aerococcus	1.9308e-05	5.05627e-05
Weissella	0.000107798	7.82696e-05
Inquilinus	1.63569e-05	3.13483e-05
Thalassolituus	5.85322e-05	5.44883e-05
Melioribacter	1.33857e-05	5.0253e-05
Eremococcus	2.04819e-05	5.58487e-05
Desulfococcus	2.01339e-05	5.25705e-05
Mesotoga	1.11382e-05	3.01048e-05
Desulfocurvus	9.45823e-06	2.35265e-05
Promicromonospora	1.30066e-05	2.16056e-05
Gimesia	4.52355e-05	7.77318e-05
Lutibacter	1.14626e-05	4.53726e-05
Labrenzia	2.26519e-05	4.24283e-05
Cyanothece	2.09924e-05	3.70489e-05
Dehalogenimonas	9.26772e-06	2.98608e-05
Zavarzinella	2.7768e-05	5.51762e-05
Facklamia	4.27395e-05	4.51629e-05
Thermicanus	1.63428e-05	4.36719e-05
Thermacetogenium	3.05313e-05	6.22257e-05
Coraliomargarita	9.02873e-05	0.000104975
Fibrella	1.8673e-05	5.54143e-05
Syntrophorhabdus	2.93015e-05	4.63933e-05
Halanaerobium	1.1211e-05	3.91848e-05
Desulfurobacterium	1.62206e-05	3.77707e-05
Planctopirus	1.76015e-05	4.70014e-05
Salinimicrobium	1.39272e-05	4.40136e-05
Desulfomicrobium	1.93897e-05	5.14609e-05
Aeribacillus	3.94173e-05	6.27545e-05
Thermotoga	2.14052e-05	5.69391e-05
Pelodictyon	1.74161e-05	4.88006e-05
Fodinicurvata	1.98363e-05	2.72913e-05
Sphingobium	1.25752e-05	3.50326e-05
Pontibacillus	1.19458e-05	3.57827e-05
Dongia	1.59413e-05	2.06773e-05
Chthonomonas	1.84069e-05	4.06076e-05
Rhodococcus	1.47617e-05	5.296e-05
Desulfatirhabdium	1.20828e-05	3.89408e-05
Serratia	1.70009e-05	6.34949e-05
Fervidobacterium	6.17714e-06	2.38537e-05
Marinitoga	1.03172e-05	2.99066e-05
Amphibacillus	7.65676e-06	3.96718e-05
Ewingella	1.32243e-05	3.07092e-05
Microbulbifer	1.12251e-05	2.85423e-05
Devosia	1.71699e-05	4.13696e-05
Halomonas	1.60142e-05	4.57338e-05
Psychrobacter	1.02806e-05	2.65289e-05
Synechococcus	2.16777e-05	5.94412e-05
Psychrilyobacter	1.13693e-05	3.49702e-05
Chlorobaculum	9.28767e-06	3.28797e-05
Hahella	1.12801e-05	3.28632e-05
Thalassobaculum	9.45744e-06	1.16251e-05
Desulfovirgula	1.4759e-05	4.08311e-05
Caldalkalibacillus	8.37393e-06	2.75729e-05
Pseudovibrio	1.115e-05	2.10388e-05
Geoalkalibacter	2.49522e-05	6.50151e-05
Nautilia	1.12641e-05	1.14726e-05
Sulfuricurvum	8.73592e-06	1.49645e-05
Thermobacillus	1.70205e-05	3.94984e-05
Methanomicrobium	6.52831e-06	2.61783e-05
Planomicrobium	8.79829e-06	2.66675e-05
Aminobacterium	1.2241e-05	3.30044e-05
Cellvibrio	6.56966e-06	2.0765e-05
Roseomonas	1.61669e-05	2.19523e-05
Francisella	3.10759e-05	5.41293e-05
Thioalkalivibrio	2.32327e-05	5.4946e-05
Thermovenabulum	1.40954e-05	3.41728e-05
Hyphomicrobium	1.05249e-05	2.45694e-05
Pectobacterium	2.10984e-05	3.76526e-05
Pseudarthrobacter	1.28338e-05	9.91516e-06
Nitritalea	8.16686e-06	3.57305e-05
Halonatronum	7.6366e-06	3.43645e-05
Symbiobacterium	2.37393e-05	5.02608e-05
Rhodothermus	1.87106e-05	4.55646e-05
Saprospira	9.42632e-06	3.83977e-05
Caballeronia	9.22931e-06	2.09116e-05
Sphingopyxis	8.42377e-06	3.16798e-05
Joostella	6.53514e-06	1.86225e-05
Frigoribacterium	7.02007e-06	1.22995e-05
Jeotgalibacillus	2.17985e-05	5.12537e-05
Persephonella	0.000146607	7.83495e-05
Imtechella	4.21045e-06	2.07465e-05
Gordonia	1.2323e-05	4.27483e-05
Crenobacter	8.42852e-06	1.09827e-05
Methylobacter	1.45607e-05	4.51162e-05
Sulfurospirillum	1.24271e-05	3.81053e-05
Endozoicomonas	8.79371e-06	3.04093e-05
Waddlia	8.15167e-06	2.20416e-05
Tolypothrix	1.59353e-05	3.39056e-05
Achromobacter	2.71591e-05	5.63809e-05
Microcystis	8.65714e-06	3.09914e-05
Yersinia	3.42002e-05	5.25615e-05
Bacteriovorax	2.50177e-05	4.23135e-05
Caenispirillum	5.1954e-05	4.36174e-05
Alteromonas	7.21293e-05	9.72982e-05
Parachlamydia	9.24926e-06	2.60942e-05
Thermodesulfatator	8.76797e-06	2.54767e-05
Anabaena	7.20567e-06	1.32076e-05
Belliella	1.32325e-05	2.8036e-05
Halothermothrix	1.77006e-05	4.39073e-05
Desulfatitalea	1.45167e-05	3.92928e-05
Salegentibacter	1.00625e-05	3.33949e-05
Desulfonatronospira	1.60649e-05	4.45342e-05
Salinispira	1.40464e-05	3.67043e-05
Trichodesmium	1.43042e-05	3.26574e-05
Chitinibacter	1.00467e-05	1.12675e-05
Pandoraea	6.80691e-06	2.48916e-05
Marinomonas	6.6709e-06	1.9477e-05
Singulisphaera	3.44795e-05	5.05867e-05
Domibacillus	6.48172e-06	2.67946e-05
Desulfocapsa	8.48845e-06	1.97983e-05
Heliobacterium	1.61727e-05	4.97631e-05
Atopococcus	8.01234e-06	1.26952e-05
Sellimonas	4.11759e-06	2.80015e-05
Bergeyella	1.15156e-05	2.68936e-05
Paraburkholderia	4.07273e-05	5.70417e-05
Thermaerobacter	2.59232e-05	4.05526e-05
Cesiribacter	8.29266e-06	3.87205e-05
Filifactor	6.21611e-06	3.17284e-05
Leptonema	1.82328e-05	3.94286e-05
Knoellia	7.04591e-06	9.33591e-06
Succinatimonas	8.7741e-06	3.75162e-05
Thiohalocapsa	1.24066e-05	2.95442e-05
Citrobacter	1.08837e-05	2.84822e-05
Levilinea	8.97354e-06	2.61877e-05
Eudoraea	5.56431e-06	1.77213e-05
Novispirillum	3.07964e-05	2.88773e-05
Gallibacterium	1.78692e-05	2.90904e-05
Klebsiella	1.99642e-05	5.27142e-05
Prochlorococcus	4.80271e-05	6.28802e-05
Paracoccus	8.32727e-06	2.37066e-05
Variovorax	1.53406e-05	2.89326e-05
Arcticibacter	1.0713e-05	2.79909e-05
Syntrophobacter	1.51865e-05	3.50428e-05
Microvirga	3.29681e-05	4.23662e-05
Pararhodospirillum	1.83149e-05	1.70482e-05
Rhodospirillum	2.98751e-05	2.87322e-05
Ornatilinea	3.55292e-06	1.89884e-05
Anaeromyxobacter	2.2694e-05	4.34496e-05
Mucispirillum	1.40343e-05	3.26606e-05
Algibacter	1.70253e-05	2.89572e-05
Galbibacter	2.36135e-05	3.86392e-05
Anaeroglobus	6.50618e-06	1.99267e-05
Edaphobacter	7.3856e-06	1.20913e-05
Silvibacterium	4.931e-06	1.4824e-05
Pseudoxanthomonas	6.03324e-06	2.22164e-05
Lyngbya	4.50659e-06	1.32823e-05
Frankia	1.0145e-05	3.28095e-05
Pantoea	2.01424e-05	3.09341e-05
Calditerrivibrio	1.06961e-05	2.5445e-05
Isosphaera	2.1461e-05	4.85453e-05
Paucisalibacillus	9.42547e-06	1.8163e-05
Anaerobaculum	7.84184e-06	2.71577e-05
Desulfarculus	1.54716e-05	2.27502e-05
Aminomonas	9.68839e-06	2.70432e-05
Tuberibacillus	1.04422e-05	2.7663e-05
Indibacter	1.12713e-05	2.68655e-05
Oleispira	6.587e-06	8.14496e-06
Croceitalea	1.21105e-05	2.59279e-05
Hyphomonas	2.78249e-05	3.75712e-05
Thermosediminibacter	2.05048e-05	3.33999e-05
Bordetella	6.61785e-06	2.39457e-05
Longilinea	1.46256e-05	3.6974e-05
Hippea	2.17463e-05	3.53968e-05
Dictyoglomus	8.42745e-06	2.58155e-05
Desulfocarbo	1.10928e-05	2.27812e-05
Beggiatoa	7.651e-06	2.4643e-05
Tumebacillus	8.43316e-06	3.1205e-05
Bhargavaea	7.9542e-06	2.57312e-05
Demequina	5.56748e-06	9.07957e-06
Rhodopseudomonas	7.61244e-06	1.34347e-05
Prosthecochloris	1.08576e-05	2.20366e-05
Altibacter	3.1193e-06	1.24825e-05
Phycisphaera	2.03453e-05	3.5553e-05
Ehrlichia	7.03316e-06	7.43574e-06
Erythrobacter	9.35129e-06	2.01661e-05
Magnetospira	2.70973e-05	2.40493e-05
Calothrix	5.14325e-06	1.45481e-05
Thiorhodococcus	8.54318e-06	2.19925e-05
Rhodonellum	8.88524e-06	2.58174e-05
Rubinisphaera	2.17171e-05	3.70471e-05
Ensifer	7.58991e-06	1.16696e-05
Myxococcus	1.91676e-05	3.30182e-05
Methylovulum	4.22297e-06	9.36103e-06
Mesoplasma	7.75184e-06	1.22445e-05
Gallionella	5.39636e-06	8.58569e-06
Gemmatirosa	1.24009e-05	3.12702e-05
Agreia	5.89368e-06	3.86623e-06
Nocardiopsis	6.0557e-06	2.32874e-05
Meiothermus	9.04794e-06	2.48223e-05
Roseiflexus	1.50411e-05	2.95127e-05
Pseudanabaena	1.56105e-05	2.47317e-05
Nitrospina	9.80386e-06	2.28139e-05
Niveispirillum	7.63503e-06	1.42709e-05
Cryptobacterium	6.68738e-05	4.91648e-05
Duganella	9.15451e-06	2.47503e-05
Desulfatiglans	1.5433e-05	3.71344e-05
Lautropia	4.16459e-06	7.20389e-06
Limnochorda	1.10294e-05	2.52924e-05
Desulfurispora	1.11389e-05	2.84441e-05
Desulfospira	3.81646e-06	1.43088e-05
Nevskia	4.63733e-06	8.32969e-06
Bizionia	4.58214e-06	9.65054e-06
Ureaplasma	1.1246e-05	1.48726e-05
Herbaspirillum	1.04794e-05	1.74754e-05
Pseudothermotoga	6.17736e-06	1.74362e-05
Paenisporosarcina	3.81739e-06	1.55438e-05
Chitinivibrio	1.47619e-05	2.4631e-05
Saccharibacillus	1.03736e-05	3.11502e-05
Nocardioides	9.1605e-06	1.98973e-05
Actinobaculum	2.01031e-05	1.95644e-05
Desulfomonile	6.73889e-06	1.7631e-05
Coriobacterium	5.48534e-06	1.98985e-05
Thermodesulfovibrio	9.19506e-06	2.61291e-05
Mesonia	9.81274e-06	2.44016e-05
Oscillochloris	4.57285e-06	1.00345e-05
Brevundimonas	7.16445e-06	1.96902e-05
Fischerella	5.45787e-06	1.64178e-05
Colwellia	1.03192e-05	1.94149e-05
Tepidicaulis	1.02115e-05	1.15153e-05
Archaeoglobus	1.56177e-05	2.37911e-05
Desmospora	6.02898e-06	2.72702e-05
Petrotoga	2.07619e-05	2.41202e-05
Desulfovermiculus	9.90478e-06	2.32402e-05
Agrobacterium	1.25097e-05	2.61434e-05
Nisaea	9.20789e-06	6.62094e-06
Gelidibacter	9.16859e-06	1.71027e-05
Pseudogulbenkiania	8.06897e-06	1.22394e-05
Ignavibacterium	1.00075e-05	2.68715e-05
Methanococcoides	7.88416e-06	2.16538e-05
Azohydromonas	3.68102e-06	6.32479e-06
Methanolacinia	5.83892e-06	1.23859e-05
Rheinheimera	4.32524e-06	1.50135e-05
Acidobacterium	1.31847e-05	2.78747e-05
Methylomonas	9.63796e-06	2.32851e-05
Desulfurispirillum	1.60111e-05	2.71872e-05
Actinoplanes	6.23704e-06	2.24694e-05
Gaetbulibacter	7.9726e-06	1.83043e-05
Porphyrobacter	5.17797e-06	1.02397e-05
Desulfobacterium	7.13245e-06	1.92063e-05
Desulforegula	9.33877e-06	2.46996e-05
Enorma	6.19805e-06	2.45876e-05
Sulfurimonas	5.58999e-06	1.44601e-05
Halobacteriovorax	7.5499e-06	1.05528e-05
Acetobacter	1.45315e-05	2.52883e-05
Ruegeria	7.45797e-06	1.16371e-05
Entomoplasma	5.96259e-06	9.59521e-06
Effusibacillus	1.35499e-05	2.69781e-05
Kribbella	2.72006e-06	1.39113e-05
Aminiphilus	1.14101e-05	2.54002e-05
Lysobacter	1.5262e-05	2.13233e-05
Acidovorax	9.89171e-06	2.39577e-05
Brevibacterium	4.4875e-06	7.2145e-06
Desulfonatronovibrio	1.41107e-05	2.62551e-05
Methanolobus	1.08318e-05	2.64979e-05
Viridibacillus	5.41472e-05	3.35061e-05
Kordiimonas	9.7894e-06	1.20382e-05
Rhodomicrobium	7.36081e-06	1.52366e-05
Morganella	5.76575e-06	1.72172e-05
Commensalibacter	1.0759e-05	1.4751e-05
Xenorhabdus	9.76683e-06	2.09745e-05
Caldilinea	1.80075e-05	3.11321e-05
Thermithiobacillus	3.62717e-06	8.79894e-06
Scytonema	2.2898e-06	1.11591e-05
Dethiosulfatarculus	3.55052e-06	1.90097e-05
Microtetraspora	5.94275e-06	6.51887e-06
Methanosaeta	6.70256e-06	1.85664e-05
Croceicoccus	4.88606e-06	2.54455e-06
Dickeya	1.94253e-06	1.02569e-05
Hydrogenivirga	1.26796e-05	2.3288e-05
Chamaesiphon	4.29034e-06	8.29031e-06
Brochothrix	0.000237449	0.000124909
Bellilinea	6.35224e-06	2.00409e-05
Coxiella	1.73944e-05	3.65852e-05
Turneriella	5.94586e-06	1.29777e-05
Oenococcus	9.80818e-06	1.75437e-05
Methanoculleus	1.23571e-05	2.91204e-05
Alcanivorax	2.27931e-05	4.30404e-05
Janthinobacterium	5.72202e-06	1.78064e-05
Kitasatospora	4.85401e-06	1.46521e-05
Ardenticatena	7.63214e-06	2.02223e-05
Fimbriimonas	2.33999e-05	2.58235e-05
Hyalangium	6.06617e-06	1.3926e-05
Methylocaldum	2.22363e-05	2.70577e-05
Zhouia	6.38787e-06	1.75844e-05
Alishewanella	3.93171e-06	5.7556e-06
Thalassotalea	5.63931e-06	1.26247e-05
Moorea	1.02959e-05	9.1965e-06
Ilyobacter	1.0836e-05	2.39007e-05
Psychrobacillus	3.01879e-06	8.03532e-06
Idiomarina	6.5689e-06	1.29316e-05
Terribacillus	2.47953e-06	7.14098e-06
Kaistia	6.28113e-06	1.07501e-05
Planktothrix	3.73208e-05	3.19763e-05
Thiorhodovibrio	2.67272e-05	4.04687e-05
Sulfitobacter	7.68356e-06	1.78901e-05
Micromonospora	9.45535e-06	1.86281e-05
Pleurocapsa	3.70523e-06	5.45844e-06
Truepera	3.75716e-06	3.66044e-06
Acidithiobacillus	6.32395e-06	1.6369e-05
Jiangella	5.56798e-06	1.25864e-05
Thioploca	4.27278e-06	8.91557e-06
Nitrosospira	6.61237e-06	1.45644e-05
Halorubrum	6.9741e-06	1.67265e-05
Ktedonobacter	4.85347e-06	1.98358e-05
Melissococcus	4.347e-06	8.69499e-06
Desulfohalobium	3.10338e-06	9.97036e-06
Ferriphaselus	4.02505e-06	5.88831e-06
Endomicrobium	9.12851e-06	2.59423e-05
Gilvimarinus	5.28754e-06	1.72411e-05
Mobiluncus	7.62202e-06	1.22074e-05
Orientia	5.62922e-06	4.88317e-06
Schlesneria	1.505e-05	3.07348e-05
Maritalea	4.84214e-06	5.00589e-06
Salinibacillus	1.35644e-06	1.0485e-05
Caldibacillus	7.4768e-06	2.19445e-05
Thermovirga	8.2277e-06	1.13241e-05
Kocuria	4.31615e-06	1.31618e-05
Lawsonia	8.35705e-06	1.11404e-05
Actinokineospora	2.92167e-06	7.20045e-06
Syntrophothermus	9.15078e-06	1.96286e-05
Sulfuricella	4.21654e-06	1.73803e-05
Balneola	4.74669e-06	1.31439e-05
Saccharibacter	4.17866e-06	4.69233e-06
Thermanaerovibrio	1.10363e-05	1.78059e-05
Calditerricola	2.69109e-06	1.37338e-05
Fluoribacter	3.28435e-06	4.19169e-06
Thioflavicoccus	9.95887e-06	1.95938e-05
Chondromyces	3.18537e-06	1.23287e-05
Nosocomiicoccus	2.04322e-06	1.06527e-05
Aphanizomenon	5.71473e-06	1.41416e-05
Haematospirillum	1.53563e-05	1.33129e-05
Magnetococcus	2.02531e-05	2.70171e-05
Aureimonas	9.27448e-06	2.25454e-05
Jonquetella	1.65664e-05	3.17036e-05
Tepidibacillus	6.21168e-06	1.64842e-05
Aquifex	4.56537e-06	8.41109e-06
Methanocaldococcus	5.13494e-06	1.01586e-05
Intestinibacter	7.12584e-06	2.02599e-05
Curtobacterium	2.59961e-06	7.8554e-06
Xenococcus	3.36076e-06	4.97011e-06
Wenzhouxiangella	6.14535e-06	1.16367e-05
Solibacillus	3.86487e-06	8.69137e-06
Sulfurihydrogenibium	1.60578e-05	2.58147e-05
Methanolinea	3.26975e-06	1.41293e-05
Plesiocystis	7.91957e-06	1.63574e-05
Neochlamydia	7.75918e-06	1.16171e-05
Verrucomicrobiales	1.2664e-05	2.20212e-05
Thermodesulfobacterium	8.48841e-06	1.99733e-05
Beutenbergia	6.54713e-06	1.21234e-05
Thermanaerothrix	5.69405e-06	1.15581e-05
Komagataeibacter	4.75169e-06	9.80907e-06
Oceanobacter	1.18867e-05	1.25414e-05
Salinispora	4.86662e-06	1.27015e-05
Propionibacterium	1.21276e-05	2.59115e-05
Acaryochloris	5.13561e-06	1.46333e-05
Rubrobacter	6.6532e-06	1.67855e-05
Nesiotobacter	3.24702e-06	4.86065e-06
Thalassobius	2.54758e-06	6.3024e-06
Nostoc	1.25836e-05	2.30628e-05
Ferroplasma	3.3598e-06	3.37238e-06
Snodgrassella	6.26314e-06	5.92384e-06
Acetohalobium	1.40583e-05	2.41713e-05
Jejuia	3.55274e-06	1.19398e-05
Dolosigranulum	2.55088e-06	4.54191e-06
Rhodanobacter	6.57501e-06	2.02248e-05
Curvibacter	2.92177e-06	5.46429e-06
Hydrogenobaculum	7.51066e-06	1.15698e-05
Aeromicrobium	3.75335e-06	1.16567e-05
Haladaptatus	2.53643e-06	6.33733e-06
Gilliamella	5.09883e-06	8.19549e-06
Rummeliibacillus	0.000102577	4.47743e-05
Atopobacter	5.08006e-06	9.68122e-06
Amycolatopsis	1.19146e-05	1.98065e-05
Oscillatoria	9.45523e-06	2.15142e-05
Lacticigenium	6.85713e-06	1.22883e-05
Pleomorphomonas	8.93915e-06	1.23719e-05
Methanosphaera	3.42326e-05	3.07877e-05
Scardovia	9.76488e-06	1.70291e-05
Nitrospirillum	5.83206e-06	5.65071e-06
Ahrensia	4.4375e-06	4.74133e-06
Agromyces	4.64114e-06	7.42849e-06
Thauera	1.10712e-05	1.85352e-05
Kyrpidia	4.15713e-06	1.71922e-05
Polaromonas	7.8423e-06	1.26862e-05
Cystobacter	0.000121633	6.3565e-05
Granulicella	1.28368e-05	2.04862e-05
Croceibacter	3.39532e-06	7.54178e-06
Geminocystis	2.59066e-05	1.99434e-05
Elstera	4.01407e-06	3.73538e-06
Thalassomonas	1.0915e-05	1.87862e-05
Reinekea	2.96575e-06	1.14409e-05
Ornithinimicrobium	3.87685e-06	3.19922e-06
Geothrix	4.40662e-06	1.06458e-05
Providencia	5.54507e-06	1.30198e-05
Salinarimonas	2.98396e-06	1.8606e-06
Methanomassiliicoccus	1.11437e-05	1.94078e-05
Ferrovum	6.20112e-06	9.58957e-06
Methylosinus	5.34907e-06	1.1945e-05
Delftia	9.83189e-06	1.41423e-05
Nitrospira	9.50093e-06	2.3735e-05
Sediminibacillus	2.86267e-06	3.16015e-06
Acidiphilium	3.32068e-06	5.98948e-06
Methylomarinum	1.88073e-06	9.40893e-06
Erwinia	8.33884e-06	1.80121e-05
Tetragenococcus	1.44753e-05	1.98114e-05
Parascardovia	1.0748e-05	1.45391e-05
Chrysiogenes	8.17641e-06	1.74945e-05
Labilithrix	5.107e-06	8.06558e-06
Solirubrobacter	1.90158e-05	2.34723e-05
Puniceibacterium	2.85311e-06	1.46845e-06
Pasteurella	2.28169e-05	2.32871e-05
Anaerobiospirillum	6.79925e-06	1.01454e-05
Thiorhodospira	2.85514e-06	4.11706e-06
Mannheimia	2.52361e-06	1.0181e-05
Methanococcus	7.71914e-06	1.92995e-05
Paraglaciecola	4.41981e-06	8.37041e-06
Spongiibacter	3.44156e-06	6.40837e-06
Oceanospirillum	3.64227e-06	5.08693e-06
Thermomicrobium	4.25003e-06	1.22762e-05
Criblamydia	2.99737e-06	6.33327e-06
Ferrimonas	4.96456e-06	1.42264e-05
Methylocapsa	4.35851e-06	4.89466e-06
Arthrospira	3.39603e-06	8.47706e-06
Rhodobacter	8.48662e-06	1.41121e-05
Aminobacter	2.11662e-06	5.00492e-06
Gluconobacter	1.2425e-05	1.47559e-05
Hylemonella	1.65795e-06	6.37421e-06
Paraliobacillus	6.59987e-06	6.42636e-06
Chloroflexus	7.32892e-06	1.75305e-05
Dethiosulfovibrio	6.87911e-06	1.75156e-05
Natranaerobius	5.72678e-06	1.67331e-05
Sulfobacillus	1.98183e-06	7.54668e-06
Achromatium	6.73852e-06	1.3899e-05
Allofustis	1.02292e-05	2.05366e-05
Coprothermobacter	2.81898e-06	8.16696e-06
Lamprocystis	4.06066e-06	1.20407e-05
Chitinilyticum	1.12049e-05	1.2153e-05
Deferribacter	1.98503e-05	2.56026e-05
Hellea	4.33683e-06	4.26958e-06
Bosea	7.95753e-06	1.73198e-05
Sanguibacter	2.10971e-06	5.61769e-06
Roseibium	8.29382e-06	8.58125e-06
Flagellimonas	3.62686e-06	8.46232e-06
Saccharomonospora	1.14823e-05	1.59147e-05
Pelomonas	6.91521e-06	1.37476e-05
Vulgatibacter	1.08592e-05	1.68289e-05
Sandaracinus	6.14529e-06	1.45127e-05
Teredinibacter	3.45888e-06	9.26214e-06
Geitlerinema	5.02312e-06	8.77596e-06
Lysinimicrobium	8.66271e-06	1.2603e-05
Azoarcus	5.70601e-06	1.3042e-05
Brucella	8.68294e-06	6.04767e-06
Salinibacter	2.87673e-06	5.7611e-06
Moellerella	2.49972e-06	2.10037e-06
Microcella	1.81132e-06	7.0336e-06
Bacillus subtilis group	2.12542e-05	2.34357e-05
Pseudooceanicola	2.60545e-06	1.26463e-06
Parvularcula	5.24121e-06	7.5852e-06
Comamonas	2.24675e-05	2.43209e-05
Martelella	5.83552e-06	9.34282e-06
Oleiagrimonas	1.52242e-06	5.35339e-06
Lentibacillus	6.50081e-06	1.34841e-05
Actinopolymorpha	4.14967e-06	6.99261e-06
Alkalibacterium	2.48833e-06	5.11829e-06
Sphaerobacter	1.02826e-05	1.29772e-05
Risungbinella	4.73609e-06	7.17472e-06
Siansivirga	6.54018e-06	1.06869e-05
Parvibaculum	2.97222e-06	7.66651e-06
Sneathiella	1.07929e-05	8.93234e-06
Caminibacter	5.5371e-06	7.71557e-06
Herpetosiphon	3.0683e-06	7.18738e-06
Limnoraphis	1.4025e-05	1.08222e-05
Halobacteroides	1.76841e-05	1.80934e-05
Jeotgalibaca	4.75894e-06	9.08248e-06
Pseudonocardia	8.04711e-06	1.61764e-05
Altererythrobacter	3.91095e-06	4.90955e-06
Defluviitoga	1.74547e-05	1.95745e-05
Loktanella	5.99938e-06	1.17057e-05
Aggregatibacter	7.75424e-06	1.00523e-05
Ilumatobacter	2.54509e-06	5.39066e-06
Borrelia	2.23937e-06	2.34166e-06
Anaerobacillus	3.00141e-06	8.93113e-06
Glycomyces	6.52474e-06	9.73246e-06
Necropsobacter	4.90209e-05	2.63233e-05
Methyloversatilis	2.48958e-06	6.61957e-06
Propionicicella	4.79154e-06	5.22657e-06
Mesoaciditoga	6.60859e-06	9.30408e-06
Blastochloris	4.53347e-06	3.55667e-06
Oligella	5.49421e-06	8.87668e-06
Thiobacillus	9.534e-06	1.3867e-05
Salisaeta	8.63316e-06	1.48375e-05
Dermabacter	4.60363e-06	1.1226e-05
Vitreoscilla	1.6994e-05	1.74955e-05
Actinotalea	4.8679e-06	9.93829e-06
Psychromonas	1.00593e-05	1.54039e-05
Thiovulum	2.6955e-05	2.58601e-05
Desulfurella	6.85189e-06	9.52597e-06
Actibacterium	1.79083e-06	3.08857e-06
Chloracidobacterium	1.32801e-05	2.49814e-05
Luteibacter	2.66481e-06	4.21286e-06
Geovibrio	1.06015e-05	1.36473e-05
Rhodoplanes	2.28614e-06	2.40097e-06
Sulfuritalea	2.71216e-06	4.24628e-06
Denitrovibrio	1.38526e-05	1.66143e-05
Celeribacter	8.04646e-06	7.99692e-06
Shimia	1.84327e-06	2.91292e-06
Uliginosibacterium	3.24903e-06	7.87204e-06
Gluconacetobacter	2.51438e-06	1.86867e-06
Oceanicola	4.1025e-06	3.82195e-06
Desulfotalea	9.43714e-06	1.16747e-05
Thioclava	2.258e-06	6.18931e-06
Tatlockia	2.00059e-06	2.40493e-06
Brachybacterium	3.07612e-06	6.28461e-06
Thermogemmatispora	3.18662e-06	6.66747e-06
Azorhizobium	8.51613e-06	9.07071e-06
Stenoxybacter	3.70564e-06	4.75531e-06
Plantibacter	1.60058e-06	4.63149e-06
Actinomadura	3.06907e-06	9.55574e-06
Pyrococcus	6.05148e-06	9.46535e-06
Rhodovulum	1.66511e-05	1.34125e-05
Pannonibacter	3.49334e-06	3.72548e-06
Andreprevotia	6.23603e-06	4.99479e-06
Streptacidiphilus	2.7993e-06	9.23483e-06
Micrococcus	3.83509e-06	1.30059e-05
Sciscionella	1.80842e-06	2.00701e-06
Catellicoccus	5.06166e-06	7.9039e-06
Desulfurivibrio	5.25018e-06	1.44566e-05
Aliihoeflea	2.0094e-06	1.56648e-06
Marinimicrobium	7.9998e-06	1.28457e-05
Cronobacter	8.48241e-06	9.71697e-06
Chelatococcus	4.53481e-06	6.90563e-06
Halocynthiibacter	2.56074e-06	2.48738e-06
Leptospirillum	1.9214e-05	1.74414e-05
Actinotignum	3.7474e-06	8.03663e-06
Sediminicola	4.57666e-06	8.72518e-06
Parasutterella	7.46844e-05	5.22761e-05
Tropicibacter	1.91842e-06	8.89269e-07
Asaia	3.70084e-06	4.81812e-06
Streptomyces griseus group	8.70142e-06	6.98333e-06
Phenylobacterium	2.80749e-06	2.90419e-06
Afipia	6.12679e-06	8.59132e-06
Alkalibacillus	7.13973e-06	1.12543e-05
Alcaligenes	6.93878e-06	7.96069e-06
Rickettsiella	2.53412e-06	2.32739e-06
Acidocella	4.58277e-06	6.5651e-06
Abiotrophia	2.37394e-06	4.33844e-06
Basfia	3.65136e-06	8.11875e-06
Thiocapsa	1.27503e-05	1.27215e-05
Dyella	7.77851e-06	1.4067e-05
Streptosporangium	5.28389e-06	9.91715e-06
Sneathia	6.82942e-06	9.40409e-06
Tistrella	1.05395e-05	7.86927e-06
Maricaulis	3.8522e-06	5.28725e-06
Fructobacillus	1.95066e-05	1.31521e-05
Varibaculum	4.55539e-06	8.94116e-06
Paludibacterium	8.8323e-06	1.24593e-05
Photorhabdus	5.91006e-06	1.16879e-05
Saccharothrix	4.73164e-06	1.06072e-05
Catenovulum	5.72207e-06	8.06276e-06
Thermocrinis	5.75036e-06	8.79794e-06
Desulfobacca	5.0296e-06	9.60876e-06
Nitrolancea	1.78695e-05	1.69238e-05
Citromicrobium	5.51809e-06	7.50174e-06
Sinomonas	4.35559e-06	4.12992e-06
Solimonas	4.28735e-06	7.51268e-06
Terracidiphilus	1.21446e-05	1.8723e-05
Rivularia	1.11118e-05	7.92287e-06
Coleofasciculus	4.04521e-06	4.9057e-06
Herbiconiux	1.22016e-06	2.06758e-06
Rhodovibrio	7.97961e-06	7.60342e-06
Mangrovibacter	1.61185e-06	3.85568e-06
Frateuria	3.97438e-06	6.05507e-06
Blattabacterium	5.54983e-06	6.34772e-06
Palaeococcus	1.67169e-06	5.4342e-06
Methanoregula	6.396e-06	8.31692e-06
Methylosarcina	3.72224e-06	6.45891e-06
Archangium	4.73818e-06	8.68429e-06
Acetobacter subgen. Acetobacter	1.88417e-06	3.22681e-06
Euryhalocaulis	3.04161e-06	4.37588e-06
Thermovibrio	8.68001e-06	1.31562e-05
Crocosphaera	2.54606e-06	3.69745e-06
Nodosilinea	2.45309e-06	4.06595e-06
Hirschia	3.82913e-06	3.2256e-06
Vagococcus	8.31538e-06	8.39673e-06
Gynuella	5.28586e-06	9.06394e-06
Oceanicaulis	4.83879e-06	7.42708e-06
Salimicrobium	4.87568e-06	7.1702e-06
Desulfobacula	6.78659e-06	1.22435e-05
Marinococcus	3.76843e-06	6.83035e-06
Alcaligenaceae	1.94055e-06	3.7424e-06
Adlercreutzia	3.98488e-06	8.54105e-06
Arenimonas	6.64696e-06	1.12692e-05
Methylotenera	1.00975e-05	9.83952e-06
Algiphilus	3.86134e-06	4.29598e-06
Glaciecola	5.8626e-06	1.03197e-05
Blastomonas	1.87034e-06	1.8312e-06
Moritella	2.77334e-06	5.95074e-06
Leisingera	4.12554e-06	8.88947e-06
Phaeobacter	5.36344e-06	6.70638e-06
Modestobacter	3.86412e-06	5.05819e-06
Tsukamurella	1.76351e-06	2.96796e-06
Haliea	9.294e-06	1.34623e-05
Chlorogloeopsis	1.40104e-06	1.42582e-06
Jeotgalicoccus	9.80113e-06	1.4e-05
Methylocystis	8.60851e-06	1.29924e-05
Crinalium	1.10397e-05	1.10473e-05
Rubidibacter	4.96921e-06	6.52509e-06
Jonesia	1.92171e-06	3.82292e-06
Alkalilimnicola	1.46519e-05	1.21239e-05
Halothiobacillus	2.13414e-06	4.55598e-06
Thermodesulfobium	5.31504e-06	7.24865e-06
Sediminibacter	9.84846e-06	1.02239e-05
Nonomuraea	2.1422e-06	5.21212e-06
Thioalkalimicrobium	3.14041e-06	5.93439e-06
Pseudoglutamicibacter	3.713e-06	3.31075e-06
Zymobacter group	1.78053e-06	3.26564e-06
Arsenicicoccus	2.05331e-06	5.94958e-06
Amphritea	1.39776e-06	1.57299e-06
Taylorella	3.25002e-06	7.25196e-06
Ponticaulis	3.2228e-06	5.79404e-06
Litoreibacter	1.35048e-06	9.43126e-07
Actinoalloteichus	1.94686e-06	3.76821e-06
Allochromatium	4.1087e-06	8.90035e-06
Stigmatella	7.73388e-06	1.1739e-05
Synechocystis	2.1803e-06	6.47267e-06
Ottowia	2.20703e-06	3.18535e-06
Bavariicoccus	8.32522e-06	8.39994e-06
Hafnia	5.96695e-06	6.92949e-06
Sideroxydans	2.40186e-06	2.22135e-06
Granulibacter	2.59728e-06	2.14856e-06
Methylophaga	4.07165e-06	8.63257e-06
Dechloromonas	3.69094e-06	5.75016e-06
Haloarcula	2.21975e-06	5.43121e-06
Avibacterium	7.38004e-06	4.53653e-06
Ponticoccus	4.97747e-06	5.09476e-06
Macrococcus	3.29157e-06	5.12351e-06
Ectothiorhodospira	2.37373e-06	4.32211e-06
Sphingorhabdus	3.82951e-06	2.23212e-06
Marinosulfonomonas	1.20939e-06	4.53573e-07
Methanothermobacter	9.65178e-06	1.19144e-05
Thermobispora	3.38225e-06	3.9139e-06
Azotobacter group	2.56409e-05	1.60242e-05
Luteimonas	9.81287e-06	1.81884e-05
Ammonifex	9.95973e-06	1.29781e-05
Halapricum	1.69452e-06	1.57112e-06
Halalkalibacillus	2.94967e-06	7.09129e-06
Rhodoferax	3.49036e-06	4.65149e-06
Afifella	1.17376e-06	1.4937e-06
Microcoleus	1.11489e-05	1.60608e-05
Octadecabacter	1.21525e-06	2.28801e-06
Methylohalobius	3.65347e-06	6.69938e-06
Ignicoccus	4.41547e-06	3.73498e-06
Gryllotalpicola	1.89921e-06	1.83013e-06
Zymomonas	3.13178e-06	3.68906e-06
Geopsychrobacter	3.97777e-06	1.06524e-05
Tepidiphilus	2.35194e-06	4.91328e-06
Pseudorhodobacter	6.502e-06	7.91402e-06
Simkania	3.9233e-06	4.7675e-06
Pseudorhodoferax	4.6299e-06	6.23701e-06
Saccharospirillum	1.84152e-06	2.03056e-06
Spirulina	3.99169e-06	4.36944e-06
Marinospirillum	2.38025e-06	3.59213e-06
Simplicispira	1.0938e-06	3.86715e-07
Salinivibrio	4.08502e-06	7.79613e-06
Tetrasphaera	2.28605e-06	3.94949e-06
Thiomicrospira	1.26875e-05	2.07807e-05
Myxosarcina	3.48979e-06	6.86354e-06
Aliagarivorans	2.39719e-06	4.8758e-06
Nitriliruptor	4.77251e-06	7.90136e-06
Enterovibrio	2.18994e-06	3.56511e-06
Propionimicrobium	1.18999e-05	1.08402e-05
Acidianus	1.47133e-06	1.50931e-06
Conchiformibius	2.08199e-06	4.45941e-06
Gemmobacter	3.25448e-06	5.84519e-06
Algicola	3.78446e-06	6.40663e-06
Halalkalicoccus	3.54586e-06	3.9265e-06
Oceanithermus	2.65163e-06	3.08776e-06
Basilea	6.21077e-06	4.74635e-06
Hydrocarboniphaga	9.36523e-06	9.05623e-06
Halothece	1.98628e-06	2.96731e-06
Edwardsiella	3.10755e-06	2.85395e-06
Mizugakiibacter	3.52481e-06	5.25007e-06
Methylococcus	7.65069e-06	1.15591e-05
Frischella	3.90613e-06	6.95537e-06
Chania	2.68188e-06	3.90661e-06
Confluentimicrobium	9.88348e-07	3.49434e-07
Desulfonauticus	1.05685e-05	1.34358e-05
Methylomicrobium	1.51126e-05	1.25745e-05
Corallococcus	2.54461e-06	6.10302e-06
Anaeroplasma	2.52801e-06	3.16671e-06
Mastigocoleus	3.91869e-06	3.40236e-06
Halorhodospira	1.22489e-06	2.56882e-06
Nitratireductor	7.27612e-06	1.02943e-05
Methyloferula	1.80209e-06	2.89747e-06
Sodalis	2.55625e-06	5.06437e-06
Pusillimonas	1.86058e-06	2.47991e-06
Richelia	8.82703e-07	9.46686e-07
Methanocella	9.29507e-06	1.14451e-05
Thiocystis	2.84791e-06	4.34478e-06
Chelonobacter	1.54228e-06	1.77441e-06
Catelliglobosispora	3.45952e-06	4.34702e-06
Actinospica	2.81564e-06	4.7143e-06
Nakamurella	2.26774e-06	3.91569e-06
Woodsholea	1.98156e-06	4.43661e-06
Halorhabdus	1.82538e-06	1.80483e-06
Trabulsiella	1.19128e-06	1.57586e-06
Nitrococcus	3.10131e-06	4.23667e-06
Rahnella	0.000170686	7.30555e-05
Microterricola	1.18018e-06	2.30531e-06
Leminorella	3.90081e-06	4.42895e-06
Nitrosococcus	9.3511e-06	1.04525e-05
Haematobacter	2.11346e-06	1.9086e-06
Georgenia	2.33916e-06	1.89662e-06
Pseudoclavibacter	3.3098e-06	7.93823e-06
Methanothermococcus	1.56302e-06	1.64347e-06
Methylobacillus	9.07988e-07	1.31207e-06
Aurantimonas	4.20988e-06	3.09146e-06
Lechevalieria	8.52459e-06	6.6801e-06
Neorickettsia	1.00003e-06	6.5516e-07
Gloeobacter	5.88741e-06	5.45351e-06
Marichromatium	4.70723e-06	5.33711e-06
Kosakonia	1.99502e-06	2.93974e-06
Cryptosporangium	8.09866e-06	9.15387e-06
Xanthobacter	4.62675e-06	5.2913e-06
Collimonas	3.92999e-06	5.64073e-06
Haliangium	7.33749e-06	9.177e-06
Halolactibacillus	3.65974e-06	5.5564e-06
Streptobacillus	1.48632e-06	1.91112e-06
Actinocatenispora	5.12179e-06	8.26082e-06
Halovivax	8.22728e-07	3.44623e-07
Plesiomonas	5.72809e-06	6.16833e-06
Mastigocladopsis	1.27195e-06	1.24667e-06
Oerskovia	1.60303e-06	2.51159e-06
Granulicatella	5.73755e-06	5.89022e-06
Hydrogenophaga	1.44584e-05	1.29341e-05
Flexistipes	6.64631e-06	8.59259e-06
Acidimicrobium	2.62732e-06	3.28013e-06
Stackebrandtia	1.9789e-06	2.00109e-06
Marmoricola	1.90069e-06	2.36768e-06
Yokenella	1.3259e-06	9.01963e-07
Rhodoluna	2.81118e-06	4.22619e-06
Azovibrio	3.58835e-06	3.49772e-06
Jannaschia	4.38445e-06	8.28918e-06
Raoultella	1.82315e-06	1.94549e-06
Limnohabitans	1.11048e-05	1.39331e-05
Hamadaea	2.71739e-06	5.70292e-06
Fulvimarina	1.37532e-06	1.82087e-06
Shimazuella	8.06591e-06	5.96904e-06
Nodularia	1.64837e-06	1.39182e-06
Borreliella	4.19472e-06	5.11206e-06
Leeia	8.40324e-07	7.24909e-07
Tardiphaga	1.39312e-06	1.25031e-06
Arsenophonus	2.16266e-06	3.52181e-06
Cylindrospermum	1.18786e-06	1.21917e-06
Tessaracoccus	1.44577e-06	2.56532e-06
Arenitalea	5.81617e-06	9.41446e-06
Kamptonema	2.24107e-06	3.33557e-06
Arhodomonas	2.16084e-06	2.44063e-06
Hydrogenobacter	8.09492e-06	9.92484e-06
Histophilus	1.03125e-05	9.31627e-06
Glaciibacter	3.56842e-06	4.88199e-06
Dolichospermum	1.85589e-06	3.5296e-06
Gayadomonas	2.1448e-06	5.01075e-06
Kangiella	5.54998e-06	8.46155e-06
Chitiniphilus	4.993e-06	5.45411e-06
Paenarthrobacter	1.68207e-06	2.2463e-06
Methanothermus	1.1875e-06	1.69537e-06
Caldimicrobium	1.99848e-06	2.38016e-06
Conexibacter	6.12228e-06	8.09986e-06
Hydrogenibacillus	4.60398e-06	5.92332e-06
Gloeocapsa	8.52858e-07	1.33925e-06
Helcobacillus	6.58612e-07	2.32855e-07
Rathayibacter	1.15369e-06	2.08244e-06
Methanoplanus	4.07513e-06	5.00919e-06
Methylogaea	2.05877e-06	1.70232e-06
Starkeya	7.33378e-07	2.09357e-06
Caldisericum	8.72455e-06	1.01609e-05
Saccharophagus	6.09813e-06	6.65875e-06
Acidithrix	7.912e-06	6.42949e-06
Salinarchaeum	2.80663e-06	2.62695e-06
Zooshikella	5.06912e-06	5.60339e-06
Azospira	1.46934e-06	2.58546e-06
Shinella	5.2135e-06	4.19206e-06
Verminephrobacter	5.95109e-07	2.10403e-07
Marinovum	2.47505e-06	2.36204e-06
Stanieria	4.32972e-06	4.02312e-06
Mycobacterium chelonae group	9.47141e-06	1.16127e-05
Luteipulveratus	4.29025e-06	4.71017e-06
Leucothrix	3.14069e-06	4.92284e-06
Salipiger	6.17281e-06	5.68277e-06
Brenneria	6.05132e-07	1.56795e-06
Mariprofundus	3.41429e-06	4.4417e-06
Heliobacillus	1.88111e-06	3.49934e-06
Sporichthya	1.62493e-06	1.90529e-06
Methanomethylovorans	5.99242e-06	8.55208e-06
Methanotorris	1.17616e-06	1.69119e-06
Methanohalobium	7.11032e-06	6.15804e-06
Marinagarivorans	2.28659e-06	2.71182e-06
Alloiococcus	1.26497e-06	1.76397e-06
Dermatophilus	2.08346e-06	2.52161e-06
Ochrobactrum	2.11901e-05	2.03356e-05
Frondihabitans	1.08447e-05	1.12188e-05
Kingella	3.34702e-06	4.588e-06
Pluralibacter	1.47914e-06	1.70712e-06
Actinomycetospora	6.65693e-07	8.12921e-07
Ferroglobus	3.77676e-07	1.19582e-06
Carnimonas	1.96542e-06	1.84745e-06
Advenella	3.45436e-06	5.1327e-06
Acidihalobacter	2.97131e-06	2.91655e-06
Halococcus	4.13589e-06	4.16984e-06
Aromatoleum	4.53565e-07	3.61882e-07
Microlunatus	8.88586e-07	9.79107e-07
Kibdelosporangium	4.27819e-06	5.61922e-06
Zhongshania	2.63281e-06	2.47463e-06
Steroidobacter	2.68719e-06	3.95762e-06
Beijerinckia	2.74299e-06	3.3408e-06
Patulibacter	3.62832e-06	5.96881e-06
Kushneria	5.65638e-07	1.2517e-06
Paenirhodobacter	2.61858e-06	1.63985e-06
Microvirgula	9.74368e-07	2.1194e-06
Sandarakinorhabdus	4.50761e-06	5.08528e-06
Aquaspirillum	1.32976e-05	4.88645e-06
Methylopila	2.7491e-06	3.7415e-06
Aliivibrio	4.61009e-06	5.46478e-06
Tolumonas	2.03498e-06	2.42732e-06
Gulbenkiania	5.27457e-06	4.65577e-06
Cedecea	2.75488e-06	2.73654e-06
Chromohalobacter	2.28978e-06	2.9995e-06
Roseobacter	5.70049e-06	7.06278e-06
Planktothricoides	1.88495e-05	1.4072e-05
Agarivorans	1.00827e-05	5.84582e-06
Janibacter	2.62344e-06	2.06504e-06
Pragia	1.75085e-06	1.96538e-06
Alysiella	3.94476e-06	3.71709e-06
Lacimicrobium	1.57935e-06	1.86977e-06
Salsuginibacillus	3.94697e-06	4.24674e-06
Cycloclasticus	1.80793e-06	2.37235e-06
Acidisphaera	4.97966e-06	5.52733e-06
Microchaete	2.08131e-06	1.83462e-06
Methylophilus	3.27269e-06	4.53942e-06
Magnetovibrio	2.29246e-06	2.07044e-06
Desulfurococcus	1.4009e-06	2.08877e-06
Aquitalea	1.88859e-06	2.96777e-06
Herbidospora	3.35896e-06	3.19272e-06
Haloquadratum	2.59136e-06	2.33699e-06
Leclercia	1.10276e-06	9.37438e-07
Acidomonas	2.25711e-06	2.86308e-06
Hoeflea	1.1329e-05	7.86159e-06
Salinisphaera	2.22236e-06	4.34115e-06
Ramlibacter	1.31166e-06	2.20807e-06
Methanofollis	2.05234e-06	2.75e-06
Roseovarius	6.57779e-06	6.72389e-06
Luminiphilus	2.20712e-06	1.42357e-06
Wolinella	1.99679e-06	2.85439e-06
Halotalea	1.62393e-06	1.8981e-06
Haloferax	3.92943e-06	4.65558e-06
Methanohalophilus	4.05971e-06	3.802e-06
Deefgea	2.4862e-06	2.95779e-06
Rubritepida	1.93054e-06	2.99059e-06
Caldimonas	1.08048e-06	1.83175e-06
Smaragdicoccus	2.56016e-06	2.5297e-06
Polycyclovorans	3.83348e-06	4.41084e-06
Streptococcus dysgalactiae group	4.10398e-05	1.869e-05
Rubellimicrobium	7.72435e-06	6.4946e-06
Rothia	3.96161e-06	4.85499e-06
Buchnera	9.32714e-07	8.0622e-07
Intrasporangium	2.42611e-06	3.04602e-06
Vulcanisaeta	3.98319e-07	4.25547e-07
Methanocalculus	1.79268e-06	2.62775e-06
Franconibacter	1.34463e-06	1.28682e-06
Defluviimonas	1.38641e-06	1.11963e-06
Longispora	1.17045e-06	1.75743e-06
Amantichitinum	1.08841e-05	4.98604e-06
Prochlorothrix	3.3294e-06	4.18162e-06
Salinimonas	3.06187e-06	4.13452e-06
Paraoerskovia	2.79673e-06	2.64761e-06
Xylella	1.87872e-06	2.55355e-06
Phycicoccus	1.58918e-06	3.56771e-06
Terrabacter	1.50647e-06	1.64844e-06
Mobilicoccus	6.73606e-07	5.78507e-07
Methylovorus	3.14045e-06	2.55414e-06
Rudaea	5.15891e-06	5.56632e-06
Kytococcus	1.60737e-06	2.1319e-06
Proteus	9.8358e-06	9.14435e-06
Azonexus	2.90635e-06	3.32468e-06
Thermofilum	3.12834e-06	4.27851e-06
Blastococcus	1.21806e-06	1.20061e-06
Clavibacter	1.12627e-06	1.73162e-06
Dactylosporangium	1.17889e-06	1.95022e-06
Ruania	4.98008e-06	5.06172e-06
Rouxiella	7.38084e-07	1.11261e-06
Pseudohaliea	1.85457e-06	1.28425e-06
Cardiobacterium	1.71952e-06	1.37618e-06
Caenimonas	8.53035e-07	1.79182e-06
Hapalosiphon	1.74622e-06	1.85274e-06
Dietzia	2.67811e-06	1.82414e-06
Maritimibacter	1.39903e-06	8.92505e-07
Pseudodonghicola	3.06454e-05	1.62629e-05
Granulicoccus	1.98012e-06	2.17473e-06
Tanticharoenia	2.33663e-06	2.10995e-06
Roseivivax	4.76622e-06	2.82253e-06
Bermanella	2.77965e-06	2.31748e-06
Estrella	7.49174e-06	5.60544e-06
Phormidium	1.39526e-06	2.07977e-06
Wenxinia	2.283e-06	1.30132e-06
Arcanobacterium	1.90989e-06	2.20608e-06
Methermicoccus	1.24209e-06	1.04644e-06
Catenuloplanes	4.43513e-06	3.79694e-06
Nitrincola	3.83872e-06	6.11731e-06
Meganema	2.46813e-06	2.26546e-06
Thermomonospora	2.4037e-06	2.98975e-06
Saccharopolyspora	2.44014e-06	3.73469e-06
Phyllobacterium	2.49306e-06	2.61023e-06
Thermomonas	2.53521e-06	1.50166e-06
Halolamina	1.93789e-06	2.23939e-06
Dichelobacter	2.38574e-06	2.59762e-06
Kineosporia	9.84663e-06	7.72373e-06
Pelagibaca	1.97084e-06	1.10469e-06
Simiduia	8.21956e-07	1.62127e-06
Kozakia	2.81721e-06	2.43126e-06
Caldivirga	2.97814e-06	3.23013e-06
Halobellus	6.42277e-07	2.9375e-07
Tateyamaria	2.16288e-06	2.23365e-06
Stappia	1.09651e-06	8.62843e-07
Ancylobacter	6.49541e-06	5.20967e-06
Laribacter	5.61493e-06	4.00142e-06
Noviherbaspirillum	1.65845e-06	1.41122e-06
Pelagibacterium	2.28421e-06	1.88958e-06
Asanoa	4.10196e-06	2.16753e-06
Kutzneria	2.86339e-06	4.54217e-06
Chroococcidiopsis	7.81599e-07	8.65527e-07
Robiginitomaculum	2.68254e-06	2.98898e-06
Neorhizobium	2.028e-06	3.70729e-06
Limnobacter	3.17252e-06	2.44448e-06
Branchiibius	1.52787e-06	8.63875e-07
Actinopolyspora	1.11534e-06	8.9251e-07
Kluyvera	3.80136e-06	2.27702e-06
Renibacterium	8.08476e-07	8.22545e-07
Haloplanus	2.41356e-06	2.40294e-06
Eikenella	1.59659e-06	2.03197e-06
Thalassobacter	2.00641e-06	2.52992e-06
Cyanobacterium	1.70465e-06	2.23164e-06
Oligotropha	4.02063e-07	2.46516e-07
Derxia	5.28589e-07	5.55485e-07
Pyrodictium	3.23712e-06	3.20146e-06
Haloterrigena	1.02942e-05	8.40465e-06
Devriesea	2.26158e-06	9.99213e-07
Aestuariimicrobium	2.19313e-06	1.76345e-06
Lampropedia	1.35434e-05	8.30547e-06
Natronorubrum	1.08327e-05	5.88859e-06
Flaviflexus	7.14457e-07	8.5116e-07
Nitrobacter	2.38097e-06	1.72524e-06
Shigella	3.9776e-06	3.25885e-06
Oceaniovalibus	1.52183e-06	1.49363e-06
Herminiimonas	6.8497e-06	5.16375e-06
Aliiroseovarius	1.36588e-06	7.30564e-07
Neptunomonas	1.66088e-06	1.65942e-06
Balneatrix	2.44643e-06	2.94011e-06
Siccibacter	2.71038e-06	3.2106e-06
Halopenitus	1.07841e-06	1.12135e-06
Mycetocola	3.04514e-06	2.15483e-06
Segniliparus	1.47779e-06	1.27127e-06
Verrucosispora	1.16268e-06	4.85717e-07
Aliiglaciecola	2.33375e-06	2.22493e-06
Lutibaculum	2.31455e-06	1.84575e-06
Lebetimonas	8.26472e-06	6.9228e-06
Simonsiella	4.81779e-06	4.69243e-06
Mumia	2.04665e-06	2.13317e-06
Cyanobium	1.53197e-06	1.03205e-06
Neptuniibacter	2.92241e-06	3.89156e-06
Aliterella	9.50451e-07	9.13221e-07
Chelativorans	5.95731e-06	4.95982e-06
Amorphus	8.31758e-07	6.44954e-07
Halosimplex	6.68039e-07	8.28755e-07
Pyrobaculum	6.54397e-07	3.25473e-07
Salinibacterium	1.22158e-06	1.22789e-06
Kineococcus	8.64022e-07	3.3915e-07
Vogesella	1.45271e-06	1.50888e-06
Shimwellia	5.62478e-07	4.28558e-07
Congregibacter	1.58262e-06	1.15317e-06
Amycolicicoccus	1.37336e-06	1.72545e-06
Hydrogenovibrio	4.70398e-06	3.07483e-06
Piscirickettsia	3.36551e-06	2.52755e-06
Allosalinactinospora	7.86413e-07	4.81949e-07
Tatumella	7.07685e-07	5.57667e-07
Halobacterium	5.03577e-06	5.49365e-06
Prosthecomicrobium	1.15706e-06	1.34566e-06
Dinoroseobacter	2.7348e-06	1.37647e-06
Turicella	5.22542e-07	2.80904e-07
Henriciella	1.8684e-06	1.9403e-06
Methanosphaerula	1.05941e-06	1.21881e-06
Acidothermus	6.4042e-07	7.57509e-07
Dasania	2.04041e-06	2.18817e-06
Pseudolabrys	1.76706e-06	1.80992e-06
Grimontia	4.00021e-06	4.71323e-06
Halobiforma	1.14458e-06	4.50718e-07
Spiribacter	3.09164e-06	3.40548e-06
Oceanimonas	2.64114e-06	1.62208e-06
Cellulosimicrobium	1.62679e-06	1.375e-06
Natrialba	4.43887e-06	2.24837e-06
Thalassobium	1.7603e-06	8.58249e-07
Williamsia	1.17218e-06	8.58256e-07
Timonella	1.22155e-06	5.12662e-07
Polynucleobacter	1.51856e-05	7.4816e-06
Sagittula	3.59172e-06	2.58818e-06
Sulfolobus	1.14033e-05	8.2368e-06
Natrinema	1.82408e-06	1.07552e-06
Spirillospora	1.48934e-06	1.24953e-06
Brackiella	5.65218e-07	5.19524e-07
Mastigocladus	2.5826e-06	1.39528e-06
Sedimentitalea	1.40082e-06	6.36857e-07
Prauserella	2.12546e-06	2.24427e-06
Aestuariivita	1.23974e-06	2.23394e-06
Sediminimonas	1.47613e-06	1.64736e-06
Pseudochrobactrum	2.13355e-06	1.94446e-06
Belnapia	1.66255e-06	1.09876e-06
Enhydrobacter	1.30309e-06	7.59707e-07
Demetria	1.94758e-06	1.03169e-06
Pseudaminobacter	3.14407e-06	3.00885e-06
Xylanimonas	3.35418e-06	3.18931e-06
Acidiplasma	1.21507e-06	7.51402e-07
Nesterenkonia	1.85074e-06	1.71536e-06
Austwickia	1.603e-06	5.66745e-07
Pseudophaeobacter	1.30581e-06	8.97939e-07
Metallosphaera	1.71822e-05	1.06693e-05
Citricoccus	1.85731e-06	1.1578e-06
Methyloglobulus	2.11269e-06	1.26564e-06
Pseudacidovorax	2.92122e-06	1.78287e-06
Methanosalsum	3.59045e-06	2.42964e-06
Bibersteinia	1.2504e-07	4.42084e-08
Castellaniella	1.88786e-07	6.6746e-08
Caldisphaera	5.92867e-06	3.42969e-06
Anaerobranca	7.4715e-07	6.64972e-07
Halogeometricum	9.44774e-06	3.94948e-06
Arsukibacterium	1.57926e-06	1.23159e-06
Methanospirillum	1.37116e-06	1.24074e-06
Pelistega	5.3218e-06	2.38764e-06
Falsirhodobacter	8.57925e-07	4.10974e-07
Alloactinosynnema	5.79638e-07	3.44038e-07
Roseibacterium	1.33874e-06	7.22133e-07
Phaseolibacter	9.35663e-07	3.30807e-07
Halanaeroarchaeum	1.34608e-06	7.02865e-07
Geoglobus	4.11303e-06	2.91566e-06
Lelliottia	1.037e-06	6.05639e-07
Streptoalloteichus	6.8472e-07	3.06843e-07
Marinithermus	2.47664e-06	2.90286e-06
Cobetia	5.17088e-07	1.82818e-07
Lentzea	1.8753e-06	1.42657e-06
Wigglesworthia	1.26202e-06	4.46193e-07
Chitinimonas	9.03613e-07	8.29805e-07
Kineosphaera	3.0554e-07	1.38656e-07
Diplorickettsia	2.41894e-06	2.15975e-06
Glutamicibacter	1.81767e-06	8.70209e-07
Planomonospora	1.91558e-06	9.50211e-07
Nitrosopumilus	6.91528e-06	3.56148e-06
Obesumbacterium	1.42679e-06	8.04004e-07
Chrysosporum	2.62387e-07	1.34969e-07
Buttiauxella	1.2317e-06	9.47836e-07
Nautella	3.91702e-07	2.11002e-07
Planktomarina	1.00828e-06	4.57282e-07
Nereida	3.56538e-06	1.34286e-06
Cucumibacter	3.09741e-06	1.70329e-06
Serpens	7.76069e-07	6.45716e-07
Natronolimnobius	1.46124e-07	5.16625e-08
Dermacoccus	6.09428e-07	5.3333e-07
Methanogenium	1.93529e-06	8.39495e-07
Ketogulonicigenium	9.41126e-07	6.56837e-07
Silanimonas	3.833e-06	1.35517e-06
Lonsdalea	1.87832e-06	7.28615e-07
Pimelobacter	8.16137e-07	4.8913e-07
Geodermatophilus	4.86326e-07	2.0429e-07
Natronobacterium	7.59131e-07	4.56136e-07
Citreicella	6.07826e-07	3.12147e-07
Silvimonas	1.9798e-06	1.19115e-06
Thermocrispum	3.36753e-07	1.65498e-07
Halomicrobium	5.17653e-07	2.30967e-07
Pectinatus	1.84648e-07	9.92411e-08
Halopiger	1.15494e-06	8.73233e-07
Paramesorhizobium	1.23227e-06	4.5645e-07
Allokutzneria	8.57505e-07	4.90197e-07
Brachymonas	1.13574e-06	4.76192e-07
Ferrimicrobium	4.62193e-07	5.67749e-07
Neosynechococcus	1.70221e-06	1.71391e-06
Acaricomes	5.44624e-07	3.86458e-07
Gulosibacter	1.0334e-06	5.73099e-07
Cylindrospermopsis	2.64964e-06	2.38738e-06
Alicycliphilus	1.23614e-06	7.9561e-07
Trichormus	1.53391e-06	5.4232e-07
Serinicoccus	1.25476e-06	7.12002e-07
Aestuariibacter	3.0662e-07	1.08407e-07
Actinosynnema	1.0771e-06	1.04912e-06
Isoptericola	1.11293e-06	1.32976e-06
Acidilobus	1.01076e-06	4.22563e-07
Dactylococcopsis	1.18871e-06	9.33712e-07
Thermosynechococcus	4.2097e-07	1.48835e-07
Thermoproteus	1.47843e-07	5.22703e-08
Anaplasma	3.46846e-06	2.50579e-06
Terracoccus	1.84337e-06	1.73034e-06
Aquamicrobium	2.18928e-06	8.95671e-07
Staphylothermus	5.17653e-07	2.30967e-07
Humibacter	9.38109e-07	6.43626e-07
Streptomonospora	2.27678e-07	8.04963e-08
Budvicia	1.68117e-06	1.26008e-06
Catenulispora	2.37626e-06	1.42073e-06
Alkanindiges	5.62821e-06	5.75372e-06
