# Supplementary material for: Monensin Alters the Functional and Metabolomic Profile of Rumen Microbiota in Beef Cattle
Source: Animals (Basel). 2018 Nov 17;8(11):211. doi: 10.3390/ani8110211 (PMC6262558; doi:10.3390/ani8110211)
Supplement: Supplementary file 1 [file animals-08-00211-s001.zip › Supplementary Table S4.xlsx]

## Sheet: species
Relative abundance of taxa at the species level
Classification	Standard deviation	Average relative abundance
Prevotella sp. FD3004	0.0195554	0.0640896
Prevotella ruminicola	0.00584945	0.0292965
Prevotella sp. MA2016	0.00469368	0.0186457
Prevotella brevis	0.00300463	0.0169815
Prevotella sp. RM4	0.00284731	0.0154237
Prevotella paludivivens	0.023755	0.0150548
Prevotella sp. P6B1	0.0033896	0.013595
Lactobacillus curvatus	0.0182295	0.0105632
Prevotella sp. P6B4	0.00239414	0.00979109
Bacteroides graminisolvens	0.0105161	0.00690927
Butyrivibrio sp. AE2032	0.0016445	0.00634594
Phascolarctobacterium sp. CAG:207	0.00131446	0.00526444
Chlamydia trachomatis	0.00170067	0.00448328
Methanobrevibacter sp. YE315	0.00534888	0.0042991
Prevotella bryantii	0.000550737	0.0037371
Prevotella sp. 109	0.000865664	0.00364926
Ruminococcus flavefaciens	0.000568053	0.00328277
Bacteroides fragilis	0.000222252	0.00294353
Prevotella oryzae	0.00080311	0.00292339
Bacteroides uniformis	0.000465241	0.00279325
Bacteroides salanitronis	0.000406991	0.00262705
Ruminococcus albus	0.000932089	0.0025813
Phascolarctobacterium sp. CAG:266	0.000590764	0.0024129
Alistipes obesi	0.000534614	0.00234194
Paraprevotella clara	0.000452715	0.00230325
Parabacteroides distasonis	0.000375847	0.00227551
Bacteroides barnesiae	0.000358175	0.00226483
Prevotella albensis	0.000352977	0.00225906
Oscillibacter sp. ER4	0.000759931	0.00207036
Selenomonas ruminantium	0.000346129	0.00201163
Alistipes senegalensis	0.000397477	0.0019562
Paraprevotella xylaniphila	0.000403425	0.00192424
Bacteroides intestinalis	0.000262843	0.00184886
Prevotella copri	0.00030885	0.0018387
Acinetobacter sp. TGL-Y2	0.00324222	0.00183694
Bacteroides massiliensis	0.000222291	0.00183132
Phascolarctobacterium succinatutens	0.000434083	0.00175283
Alistipes indistinctus	0.000361856	0.00170636
Bacteroides cellulosilyticus	0.00013676	0.00162817
Alistipes timonensis	0.000310498	0.00159527
Prevotella sp. AGR2160	0.000263476	0.00158411
Alistipes putredinis	0.000255866	0.00156426
Bacteroides ovatus	0.000140586	0.0015166
Alistipes sp. CHKCI003	0.000287582	0.00151577
Alistipes inops	0.000365004	0.00151087
Alistipes shahii	0.000334001	0.00146599
Bacteroides paurosaccharolyticus	0.000217077	0.00143614
Odoribacter splanchnicus	0.000301584	0.00142966
Alistipes sp. AL-1	0.000284703	0.00138278
Odoribacter laneus	0.000269433	0.00137772
Bacteroides gallinarum	0.000170741	0.00137591
Oscillibacter sp. 1-3	0.000516909	0.00137526
Bacteroides thetaiotaomicron	0.000155094	0.00136735
Prevotella histicola	0.000522213	0.00136392
Methanobrevibacter olleyae	0.0010084	0.00136156
Bacteroides vulgatus	0.00013556	0.00136026
Prevotella oralis	0.000362947	0.00134467
Butyrivibrio proteoclasticus	0.000500835	0.00133667
Prevotella stercorea	0.000315472	0.00131973
Tannerella forsythia	0.000216175	0.00131642
Bacteroides eggerthii	0.000217034	0.001315
Bacteroides stercoris	0.000287224	0.00131321
Bacteroides salyersiae	0.000180558	0.0013085
Alistipes sp. ZOR0009	0.00029597	0.00129416
Bacteroides coprophilus	0.000174357	0.00128441
Methanobrevibacter ruminantium	0.00079492	0.00126916
Bacteroides plebeius	0.000182181	0.00125154
Bacteroides fluxus	0.000287377	0.00124623
Barnesiella intestinihominis	0.000412678	0.00122694
Bacteroides dorei	0.000131955	0.00121727
Bacteroides oleiciplenus	0.000155958	0.00120819
Paludibacter jiangxiensis	0.000276361	0.00120469
Oribacterium sp. FC2011	0.000279058	0.00118492
Proteiniphilum acetatigenes	0.000238617	0.00117662
Butyrivibrio fibrisolvens	0.000235696	0.00117456
Bacteroides helcogenes	0.000217207	0.00114593
Robinsoniella sp. KNHs210	0.000963807	0.00112625
Methanobrevibacter millerae	0.0011601	0.00111734
Barnesiella viscericola	0.000325706	0.00111569
Prevotella buccae	0.000226008	0.00110343
Paludibacter propionicigenes	0.000267584	0.00110318
Parabacteroides goldsteinii	0.000308933	0.00110176
Hungatella hathewayi	0.000186127	0.00107323
Clostridium beijerinckii	0.0017886	0.00107044
[Clostridium] leptum	0.000153372	0.00106388
Bacteroides coprocola	0.000138202	0.0010561
Oribacterium sp. NK2B42	0.000228616	0.00104633
Subdoligranulum sp. 4_3_54A2FAA	0.000302263	0.00104435
Hallella seregens	0.000208566	0.00103296
Prevotella baroniae	0.000199194	0.00103061
Bacteroides stercorirosoris	0.000250376	0.00102488
Clostridium sp. Maddingley MBC34-26	0.00189107	0.00102127
Anaerovorax odorimutans	0.000391232	0.00101948
Fibrobacter succinogenes	0.000181594	0.00100599
[Clostridium] clostridioforme	0.000255064	0.000995872
Clostridium botulinum	0.000452532	0.000991032
Lentimicrobium saccharophilum	0.000394631	0.000986964
Bacteroides pyogenes	9.10735e-05	0.00098424
Prevotella saccharolytica	0.000201838	0.000948029
Prevotella multisaccharivorax	0.000152087	0.000943306
Butyricimonas virosa	0.000138396	0.000937572
Prevotella sp. HUN102	0.00011649	0.000927574
[Clostridium] symbiosum	0.000434952	0.00091152
Parabacteroides merdae	0.000233566	0.000910714
Rikenella microfusus	0.000216258	0.000909848
Alistipes finegoldii	0.0001903	0.000909772
Caldicoprobacter oshimai	0.000416311	0.000909679
Clostridium sp. GD3	0.000391904	0.000901018
Selenomonas sp. AE3005	0.000275783	0.000873559
Ruminococcus sp. HUN007	0.000512247	0.000862644
Marvinbryantia formatexigens	0.000118556	0.00085831
Prevotella timonensis	0.000159003	0.000856838
Prevotella oris	0.000126207	0.000853924
Eubacterium sp. AB3007	0.000184726	0.00085353
Catabacter hongkongensis	0.00017285	0.000847382
Oscillibacter valericigenes	0.000205356	0.000845309
Alistipes onderdonkii	0.000169658	0.000844611
Prevotella buccalis	0.000175667	0.00084181
Christensenella minuta	0.000156952	0.000837945
Oscillibacter ruminantium	0.00024221	0.000831726
Parabacteroides johnsonii	0.000215509	0.000831679
Alistipes sp. HGB5	0.000179741	0.000821063
Prolixibacter bellariivorans	0.000191773	0.000805486
Bacteroides finegoldii	9.50306e-05	0.000780365
Butyricimonas synergistica	0.000165106	0.000777953
Prevotella denticola	8.6091e-05	0.000768658
Parabacteroides gordonii	0.000218958	0.000763421
Mucinivorans hirudinis	0.000146461	0.000759429
Subdoligranulum variabile	0.000230802	0.000756254
Faecalibacterium prausnitzii	0.000140412	0.000749147
Prevotella maculosa	0.000138599	0.000746994
Propionispira raffinosivorans	0.00167455	0.000734563
Bacteroides nordii	0.000104678	0.000729516
Tannerella sp. oral taxon BU063	8.56746e-05	0.000729246
Prevotella sp. Sc00028	0.000193109	0.000724017
Acidaminococcus fermentans	0.000169479	0.000716421
Bacteroides faecis	0.000108242	0.000713072
Anaerotruncus sp. G3(2012)	0.00014776	0.000712302
Ruminococcus callidus	0.000628026	0.000687847
Dysgonomonas macrotermitis	9.63197e-05	0.000680746
Lactobacillus sakei	0.000905287	0.000678546
Prevotella sp. MSX73	0.000110072	0.000676671
Ruminococcus sp. FC2018	0.00018167	0.000674769
Butyrivibrio sp. VCD2006	0.000213202	0.000672626
Coprobacter secundus	0.000132874	0.000668642
Bacteroides clarus	0.000190358	0.00066728
Prevotella pleuritidis	0.000197187	0.00065785
Blautia producta	8.43849e-05	0.000648427
[Clostridium] aminophilum	0.000154333	0.000634811
Solobacterium moorei	0.000395561	0.000628996
Prevotella bergensis	0.000114522	0.000628089
Parabacteroides sp. HGS0025	0.000196578	0.000621802
Prevotella enoeca	0.000188431	0.000620537
Butyrivibrio sp. AC2005	0.0001867	0.000619932
Clostridium sp. SY8519	0.000119986	0.000618644
Ruminococcus sp. NK3A76	0.000133577	0.000618016
Prevotella dentalis	0.000134369	0.000614622
Bacteroides caccae	5.74317e-05	0.000610897
Succinimonas amylolytica	0.00018645	0.000609778
Prevotella amnii	8.32028e-05	0.00060561
Alloprevotella rava	0.000126389	0.000605327
Bacteroides sp. D20	9.65203e-05	0.000598863
Acetivibrio ethanolgignens	0.000182404	0.000596783
Prevotella disiens	0.000122822	0.000596627
Bacteroides acidifaciens	0.000110605	0.00059616
Acinetobacter sp. Ver3	0.00104022	0.000590498
Bacteroides faecichinchillae	9.73866e-05	0.000589778
Clostridium sp. DL-VIII	0.000951241	0.000587367
Bacillus cereus group	0.000274264	0.000584447
[Eubacterium] cellulosolvens	0.00015065	0.000582886
Clostridium sp. ATCC BAA-442	0.000173538	0.000579917
Pseudobutyrivibrio ruminis	0.000148067	0.00056161
Dysgonomonas mossii	0.000104661	0.000560305
[Clostridium] viride	0.000202978	0.000558405
Anaerophaga thermohalophila	0.000114679	0.000544313
Clostridiales Family XIII. Incertae Sedis	0.00017703	0.00053429
Clostridium sp. ASF502	0.000162672	0.000519524
Draconibacterium sediminis	0.00012655	0.000517801
[Clostridium] stercorarium	0.000138275	0.000517747
Carnobacterium inhibens	0.00102791	0.000515692
Bacteroides reticulotermitis	5.26389e-05	0.000515581
Alloprevotella tannerae	0.000100339	0.000514379
[Clostridium] citroniae	0.000300654	0.000513972
Eubacterium plexicaudatum	0.000212629	0.000513583
Draconibacterium orientale	9.1271e-05	0.00050907
Blautia hansenii	0.000294063	0.000508633
Dysgonomonas gadei	7.50904e-05	0.000499357
Lachnoclostridium phytofermentans	0.000174878	0.000497469
Oribacterium sp. oral taxon 078	0.00010349	0.000497121
Bacteroides sartorii	0.000130433	0.000496528
[Clostridium] methoxybenzovorans	0.000271287	0.00049389
Prevotella sp. P5-119	3.79102e-05	0.000492493
Prevotella intermedia	6.79689e-05	0.000490306
Dysgonomonas sp. HGC4	8.20054e-05	0.000489777
[Clostridium] bolteae	0.000221383	0.000489329
Prevotella bivia	6.81594e-05	0.000487924
Blautia schinkii	0.000143086	0.000484342
Oribacterium sp. P6A1	0.000130935	0.000483183
Anaerovibrio lipolyticus	8.37413e-05	0.000480267
Butyricicoccus pullicaecorum	0.000102891	0.000478594
Bacteroides sp. 14(A)	5.0359e-05	0.000474422
Prevotella marshii	9.52439e-05	0.000474386
Prevotella sp. P4-65	3.61357e-05	0.000473743
[Clostridium] scindens	0.000112514	0.000473299
Tannerella sp. 6_1_58FAA_CT1	8.09967e-05	0.000473264
Bacillus subtilis group	0.000406326	0.000466333
Methanobrevibacter smithii	0.000425964	0.000458454
Slackia heliotrinireducens	0.000106042	0.000454709
Clostridium sp. KNHs205	0.000184848	0.000451867
Eubacterium desmolans	0.000107792	0.000450992
Prevotella sp. S7 MS 2	0.000103617	0.000450267
Methanobrevibacter oralis	0.000459356	0.000447935
Bacteroides sp. D2	5.774e-05	0.000444569
Dialister succinatiphilus	0.000105706	0.000442468
Sphaerochaeta pleomorpha	0.000231058	0.000437862
Prevotella micans	7.38101e-05	0.00043627
Prevotella sp. P5-60	4.53569e-05	0.000436017
Butyrivibrio sp. AE3004	0.000133085	0.00043057
Ruminococcus bicirculans	0.000109914	0.000428618
Prevotella sp. oral taxon 473	9.27354e-05	0.000427225
Prevotella sp. 10(H)	4.46067e-05	0.000427192
Anaerovibrio sp. RM50	6.99262e-05	0.000426621
Dysgonomonas sp. BGC7	5.77129e-05	0.000424924
Clostridium saccharobutylicum	0.000722011	0.000424803
Prevotella dentasini	8.57597e-05	0.000422586
Eubacterium limosum	7.11221e-05	0.000421871
Acinetobacter calcoaceticus/baumannii complex	0.000434064	0.000420801
Fermentimonas caenicola	6.27941e-05	0.000416594
Anaerostipes hadrus	0.000157002	0.000415225
Sunxiuqinia dokdonensis	8.41329e-05	0.00041361
Prevotella sp. Sc00033	8.00753e-05	0.000409272
[Eubacterium] eligens	6.7548e-05	0.000405624
Clostridium saccharoperbutylacetonicum	0.000557506	0.000404888
Bacteroides sp. HPS0048	2.46982e-05	0.000394612
Coprococcus sp. HPP0074	0.000182847	0.000391288
Clostridium sp. ASBs410	0.000219361	0.000389597
Sphaerochaeta globosa	0.000145637	0.000388666
Prevotella sp. P4-76	5.09164e-05	0.000387098
Prevotella corporis	3.8762e-05	0.00038598
Ruminococcus champanellensis	8.77058e-05	0.000385233
Eubacterium sp. 14-2	7.33886e-05	0.000384432
Treponema bryantii	7.7616e-05	0.000383978
Peptoclostridium difficile	0.000141152	0.000382861
Butyrivibrio sp. MC2021	0.000112416	0.000380416
Dorea sp. 5-2	7.25157e-05	0.000378674
Butyrivibrio sp. AE3009	6.84955e-05	0.000378592
Prevotella melaninogenica	5.57026e-05	0.000377636
Butyrivibrio sp. AE2015	0.000116201	0.000376439
Thermophagus xiamenensis	6.30343e-05	0.00037602
Prevotella oulorum	6.7924e-05	0.000374434
Marinilabilia salmonicolor	9.59339e-05	0.000374391
Ruminiclostridium thermocellum	0.000114237	0.000371125
Clostridium sp. KLE 1755	0.000122401	0.000370802
Megasphaera elsdenii	7.58802e-05	0.000366368
Butyrivibrio sp. MC2013	8.1477e-05	0.000364347
Alkaliflexus imshenetskii	4.49116e-05	0.00036214
Butyrivibrio sp. XPD2006	0.000109726	0.000360934
Selenomonas sp. ND2010	8.5571e-05	0.000356859
Bacteroides sp. SM23_62	0.000115381	0.000353128
Clostridium sp. C105KSO14	3.97498e-05	0.00034719
Bacteroides coprosuis	5.68881e-05	0.000343912
Roseburia inulinivorans	7.9031e-05	0.000341667
Anaerotruncus colihominis	0.000126135	0.000341395
Marinifilum fragile	9.58501e-05	0.000340609
Prevotella salivae	7.4471e-05	0.000338611
Lachnoanaerobaculum sp. MSX33	0.000317348	0.000336912
Mitsuokella multacida	7.12678e-05	0.000336458
Blautia hydrogenotrophica	9.48372e-05	0.000336403
[Clostridium] methylpentosum	0.000124843	0.000336207
Butyrivibrio sp. FCS014	0.000103015	0.000336045
Prevotella sp. P5-125	5.25062e-05	0.000335344
Butyrivibrio sp. FC2001	8.83658e-05	0.000331973
Dialister invisus	7.30715e-05	0.000326949
Sinorhizobium sp. GL28	0.000256475	0.000323161
Prevotella veroralis	4.2638e-05	0.000322853
Enterococcus faecium	0.000126345	0.000322283
Blautia obeum	4.66819e-05	0.000320437
Herbinix hemicellulosilytica	7.69257e-05	0.000319888
Sanguibacteroides justesenii	6.55e-05	0.000318964
Pseudobutyrivibrio sp. MD2005	7.05885e-05	0.000318792
Butyrivibrio sp. WCE2006	9.1193e-05	0.000318632
Clostridium sp. KNHs209	8.9846e-05	0.000317828
Dysgonomonas capnocytophagoides	7.21455e-05	0.000316501
Bacteroides xylanisolvens	6.57339e-05	0.000316471
Coprobacter fastidiosus	7.57088e-05	0.000315255
[Clostridium] clariflavum	0.000133048	0.000313652
Lachnospira multipara	4.39213e-05	0.00031333
Ruminobacter sp. RM87	0.00020471	0.000310938
Butyrivibrio sp. NC2002	6.15484e-05	0.000310472
Prevotella sp. DNF00663	5.10447e-05	0.000305674
Prevotella sp. oral taxon 317	4.44418e-05	0.000301221
Clostridium sp. M62/1	5.2536e-05	0.000301147
Clostridium sp. ATCC 29733	9.30531e-05	0.00030099
Mahella australiensis	0.000109214	0.000299779
Butyrivibrio sp. LC3010	7.54017e-05	0.000295466
Terrimicrobium sacchariphilum	0.000141169	0.000292449
Prevotella shahii	4.36206e-05	0.000291491
Lentisphaera araneosa	8.11098e-05	0.000290484
Parabacteroides sp. D26	3.91648e-05	0.00028917
Lactobacillus casei group	0.000434005	0.000288916
Prevotella loescheii	4.43964e-05	0.000285554
Porphyromonas gulae	4.21755e-05	0.000284584
[Ruminococcus] gnavus	0.000104554	0.000280129
Butyrivibrio sp. AE3006	5.69991e-05	0.00028012
[Clostridium] sordellii	0.000139543	0.000279611
Butyrivibrio sp. MB2005	3.84715e-05	0.000279549
Streptococcus suis	8.04266e-05	0.000277719
Bacteroides sp. SM23_62_1	7.15073e-05	0.000277275
Butyrivibrio sp. XBB1001	7.17722e-05	0.000276264
Eubacterium xylanophilum	3.3868e-05	0.000274932
Prevotella nigrescens	3.96011e-05	0.000273471
Saccharicrinis fermentans	7.16908e-05	0.000270598
Ruminococcus gauvreauii	6.09235e-05	0.000270223
Megasphaera sp. DJF_B143	5.70535e-05	0.000268567
Porphyromonas cangingivalis	5.00101e-05	0.000267611
Prevotella sp. F0091	3.38883e-05	0.000267436
Desulfitobacterium hafniense	3.61235e-05	0.000266471
Bacteroides sp. 2_2_4	4.28459e-05	0.000265905
Clostridium butyricum	0.000112364	0.000264999
Butyrivibrio sp. VCB2006	8.23373e-05	0.000264957
Oscillibacter sp. KLE 1728	0.000108936	0.00026474
Geofilum rubicundum	6.73047e-05	0.000262026
Porphyromonas gingivalis	4.26651e-05	0.000261125
Pedosphaera parvula	0.000128665	0.000260739
Clostridium perfringens	7.1029e-05	0.000259318
Holdemania massiliensis	5.71058e-05	0.000257043
Ethanoligenens harbinense	9.53041e-05	0.000255339
[Ruminococcus] torques	9.21785e-05	0.000253577
Eubacterium ramulus	3.52709e-05	0.000253233
Pyramidobacter piscolens	6.42028e-05	0.000252867
Acetivibrio cellulolyticus	7.38125e-05	0.000252094
Clostridium sp. SS2/1	0.000106558	0.000251826
Acholeplasma brassicae	0.000147498	0.000251781
Porphyromonas crevioricanis	4.69224e-05	0.000248229
Diplosphaera colitermitum	0.000149127	0.00024713
[Clostridium] cellulosi	0.000113244	0.00024636
Treponema primitia	9.86016e-05	0.000246334
Clostridium pasteurianum	0.000256297	0.000244945
Oxobacter pfennigii	8.66632e-05	0.0002443
Enterococcus cecorum	0.000108027	0.000244046
Butyrivibrio sp. WCD3002	5.40635e-05	0.000243043
[Clostridium] neopropionicum	5.91491e-05	0.000241959
Sphaerochaeta coccoides	0.000114978	0.000241889
Cellulosilyticum lentocellum	5.63508e-05	0.000240958
Marinobacterium litorale	0.000273158	0.000240682
Roseburia intestinalis	0.000122718	0.000239797
Bacteroides sp. 3_1_33FAA	0.000126554	0.000239217
Dorea longicatena	6.22999e-05	0.00023849
Prevotella sp. oral taxon 472	3.03553e-05	0.00023737
Butyrivibrio sp. XPD2002	6.22878e-05	0.000236604
Prevotella conceptionensis	4.05839e-05	0.000236059
Prevotella sp. C561	4.05723e-05	0.000235365
Bacteroides sp. 2_1_33B	5.35963e-05	0.000235206
[Clostridium] asparagiforme	5.73157e-05	0.000233998
Dielma fastidiosa	0.000155922	0.000233637
Treponema denticola	9.20438e-05	0.000232062
Porphyromonas macacae	4.34114e-05	0.000231177
Prevotella multiformis	4.08637e-05	0.000228509
Prevotella sp. S7-1-8	4.22869e-05	0.000226199
Ruminococcus lactaris	4.04576e-05	0.000225817
Prevotella fusca	3.59719e-05	0.000225792
Bacteroides sp. 3_1_19	6.55732e-05	0.000225262
Lachnoanaerobaculum saburreum	0.000116969	0.000224872
Pseudoramibacter alactolyticus	9.67248e-05	0.000223762
Opitutus terrae	7.69983e-05	0.000220792
Sutterella wadsworthensis	0.000142665	0.000218897
[Clostridium] papyrosolvens	4.88654e-05	0.000218649
Butyrivibrio sp. AD3002	3.79914e-05	0.000218301
Bacteroides sp. 4_1_36	3.97127e-05	0.000217372
Butyrivibrio sp. VCB2001	3.73407e-05	0.000217294
Blautia wexlerae	4.23085e-05	0.000217238
[Clostridium] sporosphaeroides	0.000117609	0.000217074
Prevotella sp. HJM029	4.06441e-05	0.000214829
Butyrivibrio sp. NC3005	5.68112e-05	0.000214112
Prevotella sp. Sc00044	5.63769e-05	0.000213583
Stomatobaculum longum	4.43764e-05	0.000213547
Butyrivibrio sp. NC2007	8.17865e-05	0.000212467
Bacteroides sp. 1_1_14	3.30083e-05	0.000211995
Bacteroides sp. 3_1_23	2.74842e-05	0.000210764
Porphyromonas uenonis	3.97258e-05	0.000210524
Treponema socranskii	2.33221e-05	0.000209462
Eubacterium sp. SB2	6.58235e-05	0.000208593
Treponema sp. JC4	4.11269e-05	0.000207276
Leuconostoc mesenteroides	0.000317545	0.000206321
Blautia sp. GD8	5.4961e-05	0.000205725
Streptomyces ahygroscopicus	0.000194005	0.000205397
Bacteroides sp. 9_1_42FAA	2.50537e-05	0.000204601
Haloferula sp. BvORR071	9.56704e-05	0.00020395
Clostridium sp. JCD	6.59018e-05	0.000203949
Chthoniobacter flavus	0.000116484	0.000203901
Catenibacterium mitsuokai	9.3269e-05	0.000201931
Kandleria vitulina	9.03404e-05	0.0002013
Prevotella falsenii	4.73176e-05	0.000201254
Collinsella aerofaciens	0.000145016	0.000200804
Clostridium sp. 7_3_54FAA	9.15976e-05	0.000200158
Roseburia faecis	5.25569e-05	0.000199222
Butyrivibrio sp. WCD2001	3.43615e-05	0.00019787
Eubacterium sp. ER2	4.68775e-05	0.000197151
Acidaminococcus intestini	2.92349e-05	0.000197047
Clostridium sp. FS41	7.01453e-05	0.000196649
Mitsuokella jalaludinii	4.51405e-05	0.00019625
Bacteroides propionicifaciens	3.77622e-05	0.000196075
Roseburia hominis	7.79097e-05	0.000195631
Selenomonas bovis	5.2664e-05	0.000193907
Dorea formicigenerans	3.97795e-05	0.000193866
Pseudobacteroides cellulosolvens	7.46356e-05	0.000192329
Bacteroides sp. D22	2.68353e-05	0.000192247
Megasphaera cerevisiae	3.63479e-05	0.000190634
Vibrio harveyi group	0.000207935	0.00019001
Sanguibacteroides sp. GM7	3.2325e-05	0.000189948
Acholeplasma axanthum	0.000117252	0.000189344
Desulfosporosinus orientis	4.32192e-05	0.000188115
Catonella morbi	4.77191e-05	0.000187617
Clostridium sp. L2-50	3.26814e-05	0.000186251
Butyrivibrio sp. LB2008	2.50675e-05	0.000185638
[Eubacterium] siraeum	4.36085e-05	0.000184786
Robinsoniella peoriensis	5.65382e-05	0.00018449
Dorea sp. AGR2135	8.09391e-05	0.000184421
Acinetobacter bohemicus	0.000316328	0.000184275
Blautia sp. KLE 1732	6.24526e-05	0.000184191
Xanthomonas oryzae	3.41994e-05	0.000183764
Clostridium sp. 12(A)	6.60785e-05	0.000183549
Anaerofustis stercorihominis	0.00013601	0.000182359
Prevotella nanceiensis	4.40016e-05	0.000182297
Flexilinea flocculi	3.74366e-05	0.000179547
Paenibacillus chitinolyticus	0.000159302	0.000179488
Lachnobacterium bovis	4.31697e-05	0.00017897
Bacteroides sp. 3_1_13	3.64552e-05	0.000177988
[Clostridium] cellobioparum	4.60937e-05	0.000176778
Acidaminococcus sp. BV3L6	4.41208e-05	0.000175584
Synergistes jonesii	3.8695e-05	0.000175262
Coprococcus comes	2.56537e-05	0.000175209
Thermotalea metallivorans	4.36887e-05	0.000174683
Sporocytophaga myxococcoides	3.8765e-05	0.000174389
Bacteroides sp. 1_1_30	2.7499e-05	0.000173319
Butyrivibrio crossotus	3.76091e-05	0.000172437
Syntrophomonas wolfei	3.43887e-05	0.000171465
Ruminococcus sp. JC304	5.99356e-05	0.000169948
Prevotella aurantiaca	2.6277e-05	0.000169079
Ruminococcus sp. AT10	4.54322e-05	0.000167733
[Eubacterium] hallii	3.81938e-05	0.000167605
Acinetobacter sp. P8-3-8	0.000288457	0.000166702
Treponema sp. C6A8	2.50276e-05	0.000166246
[Clostridium] spiroforme	9.17691e-05	0.000163592
Youngiibacter fragilis	4.30896e-05	0.000163575
Eubacterium ventriosum	2.78638e-05	0.000163379
Clostridium sp. C105KSO13	4.25086e-05	0.000161629
Solitalea canadensis	3.64797e-05	0.000161583
Lactococcus lactis	5.8928e-05	0.000160686
Shuttleworthia satelles	4.32672e-05	0.000159854
Defluviitalea	4.31075e-05	0.000158291
Prevotella sp. ICM33	1.03702e-05	0.000157866
Coprobacillus sp. 8_2_54BFAA	7.66634e-05	0.00015783
Eggerthia catenaformis	5.47192e-05	0.000157536
Enterococcus faecalis	4.82931e-05	0.000156462
Planctomyces sp. SH-PL62	0.00010098	0.00015534
Prevotella pallens	2.59059e-05	0.000155267
Sharpea azabuensis	3.28933e-05	0.000155087
Bacteroides sp. 1_1_6	3.75575e-05	0.000153974
Succinivibrio dextrinosolvens	2.45202e-05	0.000153619
[Clostridium] innocuum	4.84676e-05	0.000153082
Acetobacterium woodii	6.49998e-05	0.000152552
Caldanaerobius polysaccharolyticus	6.43323e-05	0.000151504
Acetobacterium dehalogenans	4.32331e-05	0.000150486
Butyrivibrio sp. FCS006	5.74366e-05	0.000150469
Oscillibacter sp. KLE 1745	4.96739e-05	0.000150379
[Clostridium] saccharogumia	5.80231e-05	0.000150137
Escherichia coli	0.00013873	0.000150042
Porphyromonas gingivicanis	6.7819e-05	0.000149959
[Clostridium] cellulolyticum	3.71544e-05	0.000148881
Coprobacillus sp. 8_1_38FAA	7.28016e-05	0.000148786
Clostridium sp. CL-6	2.12637e-05	0.000148333
Verrucomicrobium sp. BvORR106	8.3747e-05	0.000147813
Treponema succinifaciens	2.89713e-05	0.00014727
Clostridium acetobutylicum	5.11466e-05	0.000146862
Akkermansia muciniphila	7.21254e-05	0.000146324
Coprococcus sp. HPP0048	0.000117948	0.000145598
Prevotella scopos	2.33352e-05	0.000145066
Megasphaera massiliensis	1.99707e-05	0.000144612
Enterococcus gallinarum	0.000161119	0.000143292
Prevotella sp. oral taxon 306	2.65126e-05	0.000142766
Pseudobutyrivibrio sp. LB2011	4.44019e-05	0.000140381
Clostridium sp. MSTE9	7.29008e-05	0.000140352
Porphyromonas catoniae	2.58394e-05	0.000140344
Acetobacterium bakii	4.70031e-05	0.000139522
Prevotella sp. BV3P1	4.46173e-05	0.000139167
Porphyromonas asaccharolytica	3.13469e-05	0.000138349
Capnocytophaga canimorsus	2.34625e-05	0.000138264
[Clostridium] termitidis	4.17269e-05	0.000137666
Porphyromonas levii	3.28449e-05	0.000137488
Clostridium aceticum	3.3482e-05	0.00013744
Clostridium neonatale	0.000111078	0.000136188
Porphyromonas bennonis	2.9092e-05	0.000135528
Acholeplasma hippikon	6.02718e-05	0.000134802
Clostridium sp. JCC	3.45662e-05	0.000134415
Mucilaginibacter paludis	2.09905e-05	0.000134406
Bifidobacterium breve	2.36111e-05	0.00013309
Parabacteroides sp. D13	3.17266e-05	0.000132848
Acholeplasma equifetale	6.06583e-05	0.000132723
Clostridium polynesiense	6.11875e-05	0.000132653
Coprococcus eutactus	2.45017e-05	0.000131961
Desulfotomaculum reducens	5.1139e-05	0.000131755
Holdemania filiformis	2.97629e-05	0.000131518
Flexithrix dorotheae	5.01515e-05	0.000131311
Burkholderia sp. LMG 29324	0.000161681	0.00013038
Selenomonas sp. FC4001	1.85675e-05	0.000130327
Verrucomicrobium spinosum	8.96722e-05	0.000129505
Olivibacter sitiensis	3.63902e-05	0.000129471
Caloramator australicus	2.62529e-05	0.000128681
Acinetobacter sp. ANC 4149	0.000219861	0.000126705
[Clostridium] josui	3.52301e-05	0.000126569
Treponema azotonutricium	3.88382e-05	0.00012645
Prevotella sp. Sc00066	2.69721e-05	0.000126378
[Clostridium] straminisolvens	5.48698e-05	0.000126016
Blautia sp. Marseille-P2398	2.41488e-05	0.000125913
Shuttleworthia sp. MSX8B	3.22086e-05	0.000125278
Porphyromonas somerae	3.14144e-05	0.00012463
Coprococcus sp. ART55/1	3.03058e-05	0.000124205
Erysipelothrix sp. LV19	4.88267e-05	0.000124201
Butyrivibrio sp. AE2005	2.03245e-05	0.000123118
Clostridium sp. CL-2	9.49485e-05	0.000122018
Eubacterium sp. 3_1_31	7.56647e-05	0.000121994
Bifidobacterium pseudolongum	2.0965e-05	0.000120723
Paenibacillus alvei	5.97568e-05	0.000119797
Clostridium cadaveris	2.9968e-05	0.000119617
Tyzzerella nexilis	2.49786e-05	0.000119571
Alkaliphilus metalliredigens	2.04556e-05	0.000119165
[Clostridium] glycyrrhizinilyticum	2.16975e-05	0.000118682
Eggerthella sp. YY7918	1.4062e-05	0.000118601
Paenibacillus naphthalenovorans	8.73509e-05	0.00011827
Fretibacterium fastidiosum	3.4768e-05	0.00011798
Acinetobacter bouvetii	0.000205918	0.00011784
Syntrophobotulus glycolicus	4.31547e-05	0.000117683
Allobaculum stercoricanis	1.85401e-05	0.000117144
Clostridium cellulovorans	4.52235e-05	0.000116156
Terriglobus sp. TAA 43	0.000149004	0.000115685
Empedobacter falsenii	0.00010962	0.000115426
Prevotella sp. oral taxon 299	2.73961e-05	0.000115354
Clostridium diolis	0.000220469	0.00011531
Treponema brennaborense	2.84131e-05	0.000115162
Ruminococcus faecis	1.15389e-05	0.000114588
[Eubacterium] fissicatena	3.13452e-05	0.000114383
[Clostridium] aerotolerans	2.57307e-05	0.000114233
Acinetobacter bereziniae	0.000194949	0.000113987
Clostridium sp. ASF356	2.5868e-05	0.000113808
[Clostridium] saccharolyticum	2.97673e-05	0.000112702
Burkholderia cepacia complex	8.88315e-05	0.000111664
Owenweeksia hongkongensis	3.32492e-05	0.000110839
Porphyromonas canoris	3.71578e-05	0.00011059
Clostridium intestinale	3.47721e-05	0.000110258
Eubacterium acidaminophilum	2.09934e-05	0.000110037
Parabacteroides sp. 20_3	1.87375e-05	0.000109481
Enterorhabdus mucosicola	5.31006e-05	0.000109365
Pseudopedobacter saltans	2.65672e-05	0.000108786
Brochothrix campestris	0.000212567	0.000108308
Anaerolinea thermolimosa	2.96517e-05	0.000108244
Haliscomenobacter hydrossis	3.02171e-05	0.000107971
Segetibacter koreensis	3.42267e-05	0.000107301
Treponema saccharophilum	3.27413e-05	0.000107072
Gardnerella vaginalis	6.0585e-05	0.000107018
Dehalococcoides mccartyi	3.50021e-05	0.000107018
Oribacterium asaccharolyticum	6.12399e-05	0.000106849
Lactobacillus manihotivorans	0.000166418	0.000106847
Olsenella sp. oral taxon 807	1.12336e-05	0.000106399
Thermobrachium celere	3.08552e-05	0.000106254
Acetonema longum	2.66633e-05	0.000106044
Anaerostipes sp. 3_2_56FAA	6.25496e-05	0.000105816
Paenibacillus polymyxa	4.4769e-05	0.00010578
Faecalitalea cylindroides	3.80209e-05	0.000105597
Clostridium sp. C105KSO15	2.70757e-05	0.000105588
Acholeplasma palmae	6.90072e-05	0.000105518
Caloramator sp. ALD01	2.55497e-05	0.000105122
Dehalobacter sp. UNSWDHB	4.30509e-05	0.000105112
Clostridium bornimense	1.79404e-05	0.000105059
Coraliomargarita akajimensis	9.02873e-05	0.000104975
Dorea sp. D27	2.55323e-05	0.000104623
Fervidicella metallireducens	3.10924e-05	0.000104576
Gorillibacterium massiliense	2.80186e-05	0.000104533
Caloranaerobacter azorensis	1.66019e-05	0.000104517
Ruminococcus sp. 5_1_39BFAA	1.64902e-05	0.000104337
Herbinix sp. SD1D	5.20057e-05	0.000103908
Akkermansia sp. KLE1797	4.7848e-05	0.000102731
Megamonas hypermegale	3.91224e-05	0.000102127
Selenomonas sputigena	2.29216e-05	0.000101428
Verrucomicrobium sp. BvORR034	5.64213e-05	0.000100797
Clostridium sp. HMP27	3.88039e-05	0.000100759
Pedobacter glucosidilyticus	3.04938e-05	0.000100575
Methanobacterium formicicum	8.07364e-05	0.000100006
Acholeplasma laidlawii	2.9597e-05	9.98263e-05
Alloscardovia omnicolens	4.92451e-05	9.90392e-05
Leadbetterella byssophila	2.77355e-05	9.90253e-05
Treponema maltophilum	2.76269e-05	9.84434e-05
Eubacterium brachy	2.90458e-05	9.82741e-05
Porphyromonas endodontalis	1.74338e-05	9.81915e-05
Clostridium tetani	4.66708e-05	9.77815e-05
Clostridium tyrobutyricum	3.38725e-05	9.76493e-05
Mogibacterium sp. CM50	4.70231e-05	9.75081e-05
Lactobacillus ruminis	1.4454e-05	9.72479e-05
Caloramator mitchellensis	3.90841e-05	9.72313e-05
Branhamella	9.20605e-05	9.71439e-05
Streptococcus pneumoniae	5.39708e-05	9.64319e-05
Desulfitobacterium dichloroeliminans	2.53414e-05	9.63105e-05
Chitinophaga pinensis	1.03954e-05	9.5682e-05
Turicibacter sp. H121	4.41674e-05	9.54671e-05
Propionispora sp. Iso2/2	3.74768e-05	9.51095e-05
Acinetobacter lwoffii	0.000153801	9.48762e-05
Clostridium sp. KNHs214	1.3036e-05	9.45631e-05
Caldanaerobacter subterraneus	2.9347e-05	9.43035e-05
Niastella koreensis	2.54716e-05	9.40389e-05
Acholeplasma granularum	3.80602e-05	9.39603e-05
Clostridium sp. D5	2.67435e-05	9.37571e-05
Listeria monocytogenes	5.55634e-05	9.32969e-05
Flavobacterium psychrophilum	2.28326e-05	9.31219e-05
Ruminococcus sp. DSM 100440	3.83843e-05	9.28984e-05
Runella limosa	1.84147e-05	9.28387e-05
Acinetobacter johnsonii	0.00015384	9.25927e-05
Succinispira mobilis	2.739e-05	9.25263e-05
Niabella aurantiaca	3.37384e-05	9.22883e-05
Sphingobacterium sp. 21	2.1148e-05	9.21564e-05
Clostridium sp. BNL1100	1.61722e-05	9.16831e-05
Lactobacillus equicursoris	2.76847e-05	9.10336e-05
Dehalobacter sp. FTH1	4.50612e-05	9.01136e-05
Zunongwangia profunda	2.68773e-05	9.00714e-05
Terrisporobacter othiniensis	3.26037e-05	9.00619e-05
Aeromonas simiae	0.000204529	8.98129e-05
Finegoldia magna	2.2619e-05	8.96814e-05
Blastopirellula marina	4.19662e-05	8.9402e-05
Olsenella profusa	2.19404e-05	8.90408e-05
Caldisalinibacter kiritimatiensis	2.65442e-05	8.90386e-05
Phaeodactylibacter xiamenensis	2.01638e-05	8.89192e-05
Pontibacter korlensis	2.99527e-05	8.87522e-05
Bilophila wadsworthia	4.1014e-05	8.80151e-05
Selenomonas sp. CM52	3.79447e-05	8.71886e-05
Flavobacterium chungangense	2.2153e-05	8.7103e-05
Dethiobacter alkaliphilus	2.62135e-05	8.69688e-05
Elizabethkingia anophelis	2.13081e-05	8.67548e-05
Acinetobacter equi	0.000149209	8.6699e-05
Fusobacterium nucleatum	2.912e-05	8.66688e-05
Acinetobacter sp. TTH0-4	0.00014777	8.64618e-05
Rufibacter tibetensis	7.63313e-06	8.59257e-05
Pelosinus sp. UFO1	7.45412e-05	8.55954e-05
Holdemanella biformis	3.36794e-05	8.53268e-05
Spirochaeta smaragdinae	2.57732e-05	8.52426e-05
Flavobacterium sp. Fl	0.000134602	8.49986e-05
Capnocytophaga cynodegmi	2.46056e-05	8.49613e-05
Runella zeae	2.17859e-05	8.46868e-05
Bacteroides sp. 3_1_40A	1.7759e-05	8.45493e-05
Proteiniclasticum ruminis	2.59916e-05	8.40043e-05
Treponema pedis	2.16841e-05	8.36677e-05
Faecalicoccus pleomorphus	2.11711e-05	8.29555e-05
Clostridium colicanis	2.49984e-05	8.28549e-05
Bacteroides sp. 2_1_16	3.33922e-05	8.28063e-05
Megasphaera sp. MJR8396C	1.46193e-05	8.27949e-05
Mitsuokella sp. oral taxon 131	1.26021e-05	8.25565e-05
Streptococcus anginosus group	5.88344e-05	8.20028e-05
Veillonella montpellierensis	6.40079e-05	8.17876e-05
Methanobrevibacter wolinii	6.46436e-05	8.1366e-05
Acinetobacter guillouiae	0.000132071	8.12331e-05
Paenibacillus sophorae	2.91571e-05	8.1195e-05
Flavobacterium daejeonense	2.6329e-05	8.10471e-05
Aureispira sp. CCB-QB1	2.11762e-05	8.08741e-05
Porphyromonas sp. 31_2	2.6377e-05	8.01277e-05
Spirochaeta thermophila	2.94249e-05	8.00704e-05
Thermonema rossianum	2.48222e-05	8.00277e-05
Rhodopirellula sp. SWK7	5.21275e-05	7.97625e-05
Treponema vincentii	3.67905e-05	7.97402e-05
Spirochaeta sp. JC202	5.58893e-05	7.96451e-05
Terrisporobacter glycolicus	3.47158e-05	7.95837e-05
Proteiniphilum sp. 51_7	2.02559e-05	7.94026e-05
Clostridium sporogenes	3.1694e-05	7.92707e-05
Planctomyces sp. SH-PL14	4.61832e-05	7.91819e-05
Desulfotomaculum ruminis	2.51079e-05	7.89748e-05
Oxalobacter formigenes	4.8296e-05	7.78422e-05
Pedobacter sp. PACM 27299	2.08569e-05	7.7802e-05
Pirellula staleyi	2.71172e-05	7.77825e-05
Fibrisoma limi	2.4855e-05	7.77719e-05
Gimesia maris	4.52355e-05	7.77318e-05
Leadbetterella sp. JN14-9	2.24354e-05	7.75471e-05
Anaerosalibacter sp. ND1	2.41437e-05	7.75332e-05
Olsenella scatoligenes	1.50164e-05	7.73258e-05
Niabella soli	2.54054e-05	7.71415e-05
Acinetobacter sp. HR7	0.000131757	7.70803e-05
Fusobacterium necrophorum	1.82129e-05	7.70409e-05
Clostridium homopropionicum	8.19952e-06	7.70111e-05
Clostridiisalibacter paucivorans	1.31268e-05	7.66179e-05
[Clostridium] mangenotii	3.1053e-05	7.65729e-05
Anaeromusa acidaminophila	4.65024e-05	7.64332e-05
Sorangium cellulosum	2.52453e-05	7.63087e-05
Megasphaera sp. BV3C16-1	1.50815e-05	7.5619e-05
Terrimonas ferruginea	3.17287e-05	7.55127e-05
Desulfobulbus japonicus	2.15138e-05	7.55118e-05
Cellulosilyticum ruminicola	1.60996e-05	7.54196e-05
Nafulsella turpanensis	2.03383e-05	7.52604e-05
Sphingobacterium spiritivorum	1.76265e-05	7.522e-05
Pelotomaculum thermopropionicum	2.97683e-05	7.46407e-05
Porphyromonas sp. oral taxon 278	1.54088e-05	7.45361e-05
Pseudomonas aeruginosa group	4.23737e-05	7.44353e-05
Butyrivibrio sp. AE3003	2.25593e-05	7.42237e-05
Lactobacillus graminis	0.000118444	7.38473e-05
[Clostridium] hylemonae	1.21183e-05	7.3357e-05
Porphyromonas sp. COT-239 OH1446	1.6412e-05	7.30581e-05
Campylobacter fetus	2.28828e-05	7.30492e-05
Lactobacillus plantarum	0.000101698	7.27307e-05
Clostridium celatum	3.93378e-05	7.26029e-05
Dyadobacter beijingensis	3.22735e-05	7.25884e-05
Flectobacillus major	1.80748e-05	7.25262e-05
Caloranaerobacter sp. TR13	1.91505e-05	7.24495e-05
Alteromonas sp. Nap_26	7.19431e-05	7.24491e-05
Moraxella	5.1137e-05	7.24063e-05
Paenibacillus elgii	3.31582e-05	7.20329e-05
Fusobacterium perfoetens	2.23298e-05	7.1596e-05
Hassallia byssoidea	2.55995e-05	7.0996e-05
Treponema caldarium	2.22915e-05	7.09345e-05
Robinsoniella sp. RHS	2.18025e-05	7.08466e-05
Crocinitomix catalasitica	1.81052e-05	7.06936e-05
Thermoanaerobacterium thermosaccharolyticum	1.9521e-05	7.0665e-05
Porphyromonas sp. COT-108 OH1349	1.99022e-05	6.99183e-05
Burkholderia ubonensis	6.02766e-05	6.96313e-05
Bacillus thermoamylovorans	2.59766e-05	6.96263e-05
Sediminibacterium sp. OR53	1.34086e-05	6.95759e-05
Clostridium scatologenes	2.18918e-05	6.95054e-05
Anaerosporomusa subterraneum	1.77975e-05	6.88203e-05
Sphingobacterium sp. Ag1	1.60332e-05	6.86339e-05
Elizabethkingia meningoseptica	2.19671e-05	6.86293e-05
Clostridium lundense	3.63753e-05	6.83504e-05
[Clostridium] hiranonis	1.42839e-05	6.78448e-05
Pedobacter sp. Hv1	2.69729e-05	6.77949e-05
Pedobacter sp. V48	2.30844e-05	6.77869e-05
Pyrinomonas methylaliphatogenes	2.44731e-05	6.76303e-05
Moorella thermoacetica	1.40341e-05	6.73032e-05
Marivirga tractuosa	1.71873e-05	6.72048e-05
Ruminococcus sp. SR1/5	2.55874e-05	6.6877e-05
Faecalibaculum rodentium	2.29182e-05	6.66988e-05
Bacteroides sp. 4_3_47FAA	1.22956e-05	6.6604e-05
[Clostridium] celerecrescens	1.6583e-05	6.6462e-05
Empedobacter brevis	6.79097e-05	6.63801e-05
Acholeplasma oculi	3.39505e-05	6.61372e-05
Megamonas funiformis	1.80084e-05	6.60728e-05
Paenibacillus sp. JDR-2	2.15634e-05	6.59396e-05
Pedobacter ginsenosidimutans	2.42342e-05	6.56225e-05
Olsenella uli	1.63734e-05	6.55938e-05
Flammeovirga sp. SJP92	1.63767e-05	6.5588e-05
Runella slithyformis	2.38356e-05	6.54226e-05
Bulleidia extructa	1.66918e-05	6.53363e-05
Gorillibacterium sp. SN4	1.805e-05	6.53182e-05
Actinomyces graevenitzii	2.54934e-05	6.48453e-05
Streptococcus equinus	3.24625e-05	6.48037e-05
Lunatimonas lonarensis	2.55378e-05	6.4781e-05
Pedobacter heparinus	2.04952e-05	6.47108e-05
Tepidanaerobacter syntrophicus	1.07008e-05	6.4706e-05
Microscilla marina	1.30051e-05	6.45329e-05
Clostridium tunisiense	1.78846e-05	6.4376e-05
Gracilibacter sp. BRH_c7a	2.60181e-05	6.43469e-05
Riemerella columbina	1.56565e-05	6.43173e-05
Sphingobacterium paucimobilis	1.55538e-05	6.42081e-05
Paenibacillus algorifonticola	2.74663e-05	6.42073e-05
Alkaliphilus oremlandii	2.00437e-05	6.40577e-05
Flavihumibacter solisilvae	1.70776e-05	6.39556e-05
Pedobacter sp. NL19	1.92842e-05	6.3365e-05
Microbispora rosea	1.882e-05	6.31914e-05
Treponema endosymbiont of Eucomonympha sp.	2.93151e-05	6.28827e-05
Echinicola vietnamensis	2.51187e-05	6.28009e-05
Aeribacillus pallidus	3.94173e-05	6.27545e-05
Sebaldella termitidis	3.04637e-05	6.27166e-05
Desulfitibacter alkalitolerans	3.02701e-05	6.26748e-05
Paenibacillus mucilaginosus	1.37254e-05	6.2663e-05
Porphyromonas sp. COT-290 OH860	2.64948e-05	6.26351e-05
Streptococcus agalactiae	4.30019e-05	6.25381e-05
Clostridium sp. 7_2_43FAA	1.85955e-05	6.22357e-05
Thermacetogenium phaeum	3.05313e-05	6.22257e-05
Senegalimassilia anaerobia	1.62237e-05	6.21711e-05
Paenibacillus daejeonensis	2.34202e-05	6.2129e-05
Thermosinus carboxydivorans	1.78273e-05	6.20812e-05
Clostridium sp. BL8	1.38911e-05	6.19431e-05
Bacillus coagulans	1.97055e-05	6.18787e-05
Clostridium carboxidivorans	3.04803e-05	6.16969e-05
Acinetobacter indicus	0.000110061	6.1687e-05
Enterobacter cloacae complex	2.33862e-05	6.15457e-05
Atopobium sp. BV3Ac4	3.71464e-05	6.14512e-05
Gordonibacter pamelaeae	8.27141e-06	6.14202e-05
Desulfosporosinus youngiae	1.09881e-05	6.13395e-05
Spirochaeta bajacaliforniensis	1.88895e-05	6.12912e-05
Alkaliphilus transvaalensis	2.08832e-05	6.12167e-05
Sphingobacterium sp. ACCC 05744	1.89762e-05	6.1164e-05
Spirosoma luteum	1.33415e-05	6.10126e-05
Chryseobacterium indologenes	2.42479e-05	6.09817e-05
Collinsella sp. GD3	1.53551e-05	6.08926e-05
[Clostridium] bifermentans	3.34203e-05	6.07871e-05
Leptolinea tardivitalis	1.61826e-05	6.06191e-05
Cytophaga aurantiaca	1.17481e-05	6.05196e-05
Paenibacillus macerans	9.15597e-06	6.03579e-05
Chloroherpeton thalassium	1.52126e-05	6.02691e-05
Tepidanaerobacter acetatoxydans	1.42186e-05	6.02345e-05
Desulfotomaculum gibsoniae	2.41897e-05	6.01318e-05
Mageeibacillus indolicus	1.80612e-05	6.01237e-05
Synergistes sp. 3_1_syn1	1.15867e-05	6.00677e-05
Arenibacter algicola	2.68917e-05	6.00637e-05
Dialister micraerophilus	2.14014e-05	6.00449e-05
Trichococcus collinsii	1.89142e-05	5.99407e-05
Johnsonella ignava	1.03296e-05	5.9799e-05
Thermoanaerobacterium aotearoense	3.27086e-05	5.9707e-05
Desulfosarcina sp. BuS5	2.12918e-05	5.96493e-05
Acinetobacter schindleri	0.000103569	5.9646e-05
Clostridium sulfidigenes	1.24857e-05	5.96147e-05
Syntrophaceticus schinkii	1.49623e-05	5.95521e-05
Desulfosporosinus sp. BRH_c37	2.13334e-05	5.93934e-05
Peptoniphilus sp. BV3C26	4.1936e-05	5.93929e-05
Coprobacillus sp. 3_3_56FAA	1.56027e-05	5.93423e-05
Fulvivirga imtechensis	1.40635e-05	5.91884e-05
Clostridium novyi	2.08805e-05	5.91411e-05
Pirellula sp. SH-Sr6A	1.83728e-05	5.90402e-05
Peptostreptococcus sp. MV1	3.89497e-05	5.88406e-05
Bifidobacterium bifidum	6.48071e-06	5.88203e-05
Treponema phagedenis	3.43555e-05	5.87176e-05
Staphylococcus aureus	2.3045e-05	5.86833e-05
Persicobacter sp. JZB09	1.16076e-05	5.83819e-05
Bacillus sp. Leaf49	4.24675e-05	5.82854e-05
Novosphingobium sp. KN65.2	0.000136185	5.79488e-05
Lewinella sp. 4G2	2.43908e-05	5.78925e-05
Desulfotomaculum acetoxidans	1.58393e-05	5.76811e-05
Persephonella sp. IF05-L8	0.000137499	5.76795e-05
Bifidobacterium longum	2.52062e-05	5.75159e-05
Pelosinus fermentans	4.92278e-05	5.74945e-05
Rudanella lutea	1.81169e-05	5.74358e-05
Megamonas rupellensis	2.43496e-05	5.71472e-05
Ureibacillus thermosphaericus	1.59506e-05	5.70941e-05
Bacillus pumilus	3.21348e-05	5.70267e-05
Stenotrophomonas maltophilia group	3.61707e-05	5.67072e-05
Peptoniphilus senegalensis	3.56895e-05	5.6702e-05
Flaviramulus ichthyoenteri	2.15362e-05	5.64576e-05
Cloacibacillus evryensis	1.1203e-05	5.63965e-05
Clostridium akagii	2.98788e-05	5.63669e-05
[Clostridium] litorale	2.26178e-05	5.61771e-05
Centipeda periodontii	1.62265e-05	5.61207e-05
Ornithobacterium rhinotracheale	7.28821e-06	5.5926e-05
Eremococcus coleocola	2.04819e-05	5.58487e-05
Clostridium sp. DMHC 10	2.10724e-05	5.57656e-05
Selenomonas sp. F0473	1.1824e-05	5.56791e-05
Fibrella aestuarina	1.8673e-05	5.54143e-05
Acinetobacter sp. A47	5.75349e-05	5.53768e-05
Emticicia oligotrophica	1.46015e-05	5.53065e-05
Zavarzinella formosa	2.7768e-05	5.51762e-05
Bacillus massiliogorillae	1.08776e-05	5.5079e-05
Schleiferia thermophila	1.55429e-05	5.4963e-05
Flavobacterium hibernum	6.38669e-05	5.48777e-05
Clostridium sp. LF2	1.3524e-05	5.48683e-05
Rubritalea marina	1.55457e-05	5.45181e-05
Thalassolituus oleivorans	5.85322e-05	5.44883e-05
Lactobacillus rhamnosus	5.69031e-05	5.42945e-05
Clostridium cylindrosporum	2.11606e-05	5.41618e-05
Clostridium kluyveri	1.84175e-05	5.4068e-05
Methanobrevibacter arboriphilus	4.7189e-05	5.40664e-05
Lacinutrix sp. 5H-3-7-4	1.85004e-05	5.39585e-05
Mangrovimonas sp. TPBH4	1.40552e-05	5.38665e-05
Vibrio cholerae	6.02881e-05	5.36476e-05
Flexibacter roseolus	1.18075e-05	5.36243e-05
Bacteroides sp. Ga6A2	1.54212e-05	5.33047e-05
Flavihumibacter sp. CACIAM 22H1	1.58866e-05	5.32889e-05
Bacteroides sp. Ga6A1	1.38193e-05	5.32849e-05
Lysinibacillus sphaericus	3.06888e-05	5.27874e-05
Fluviicola taffensis	1.7507e-05	5.25923e-05
Leptolyngbya sp. JSC-1	0.00012998	5.24675e-05
Enterorhabdus caecimuris	2.45753e-05	5.24662e-05
Parasutterella excrementihominis	7.46844e-05	5.22761e-05
Apibacter mensalis	8.46706e-06	5.22566e-05
Streptococcus dysgalactiae group	1.30079e-05	5.21699e-05
Methanobacterium lacus	3.89078e-05	5.21631e-05
Desulfotomaculum kuznetsovii	2.13705e-05	5.19455e-05
Lewinella persica	1.64638e-05	5.1763e-05
Brevibacillus laterosporus	1.7142e-05	5.17576e-05
Rhodopirellula sallentina	3.34328e-05	5.16931e-05
Caldicellulosiruptor sp. Wai35.B1	3.90662e-05	5.14634e-05
Fervidicola ferrireducens	5.41451e-06	5.1326e-05
Clostridium sartagoforme	8.85371e-06	5.12724e-05
Dyadobacter fermentans	1.97869e-05	5.11225e-05
Sphingobacterium thalpophilum	7.88963e-06	5.11053e-05
Capnocytophaga sp. oral taxon 332	2.14916e-05	5.09768e-05
Desulfotomaculum nigrificans	1.3843e-05	5.09054e-05
Leptolyngbya sp. O-77	1.06962e-05	5.09051e-05
Virgibacillus soli	2.2235e-05	5.09028e-05
Lactococcus garvieae	1.54548e-05	5.08356e-05
Cyclobacterium marinum	2.07838e-05	5.07667e-05
Flavobacterium akiainvivens	1.22203e-05	5.06259e-05
Singulisphaera acidiphila	3.44795e-05	5.05867e-05
Streptococcus gallolyticus	1.63027e-05	5.04806e-05
Orenia marismortui	1.54351e-05	5.04421e-05
Cohnella panacarvi	1.82119e-05	5.02702e-05
Symbiobacterium thermophilum	2.37393e-05	5.02608e-05
Melioribacter roseus	1.33857e-05	5.0253e-05
Butyrivibrio hungatei	1.39281e-05	5.00742e-05
Flammeovirga sp. OC4	1.48954e-05	4.9991e-05
Clostridium chauvoei	1.90478e-05	4.99183e-05
Sphingobacterium sp. T2	1.94007e-05	4.97947e-05
Heliobacterium modesticaldum	1.61727e-05	4.97631e-05
Anaeroarcus burkinensis	3.33336e-05	4.96624e-05
Acidaminococcus sp. D21	1.03775e-05	4.96335e-05
Salmonella enterica	1.65692e-05	4.96175e-05
Psychroflexus torquis	7.52638e-06	4.94254e-05
Algoriphagus sp. NH1	8.45892e-06	4.9408e-05
Treponema sp. OMZ 838	1.7068e-05	4.9395e-05
Flavobacterium sp. EM1308	1.82302e-05	4.9316e-05
Nitrosomonas ureae	5.28952e-05	4.92072e-05
Cryptobacterium curtum	6.68738e-05	4.91648e-05
Porphyromonas sp. COT-290 OH3588	1.04499e-05	4.90586e-05
Methanobrevibacter boviskoreani	4.1242e-05	4.9021e-05
Pseudomonas fluorescens group	2.0616e-05	4.90066e-05
Acholeplasma modicum	2.67187e-05	4.88825e-05
Acinetobacter brisouii	0.000108301	4.87739e-05
Rhodopirellula maiorica	2.78435e-05	4.87661e-05
Porphyromonas sp. oral taxon 279	1.07616e-05	4.87577e-05
Selenomonas infelix	1.0774e-05	4.8699e-05
Collinsella tanakaei	2.36904e-05	4.86726e-05
Staphylococcus epidermidis	3.76227e-05	4.86484e-05
Thermoanaerobacter sp. YS13	1.26598e-05	4.85755e-05
Isosphaera pallida	2.1461e-05	4.85453e-05
Fusobacterium mortiferum	4.7232e-05	4.84916e-05
Rufibacter sp. DG15C	1.36123e-05	4.84669e-05
Lewinella cohaerens	1.16315e-05	4.83392e-05
Desulfosporosinus acididurans	1.06916e-05	4.82072e-05
Algoriphagus machipongonensis	1.66524e-05	4.8144e-05
Desulfatibacillum aliphaticivorans	1.55604e-05	4.80559e-05
Porphyromonas sp. COT-108 OH2963	1.6763e-05	4.80408e-05
[Clostridium] sticklandii	1.06985e-05	4.78911e-05
Aequorivita capsosiphonis	1.65264e-05	4.76298e-05
Flavobacterium denitrificans	1.29294e-05	4.75517e-05
Parvimonas micra	1.87162e-05	4.74881e-05
Cecembia lonarensis	1.68702e-05	4.72869e-05
Lactobacillus johnsonii	2.14882e-05	4.72615e-05
Adhaeribacter aquaticus	2.10011e-05	4.72585e-05
Desulfitobacterium metallireducens	2.55802e-05	4.72241e-05
Planctopirus limnophila	1.76015e-05	4.70014e-05
Cyclobacterium amurskyense	1.62206e-05	4.6867e-05
Clostridium drakei	9.51685e-06	4.68117e-05
Pontibacter roseus	1.45176e-05	4.6698e-05
Erysipelothrix rhusiopathiae	1.69507e-05	4.66743e-05
Holophaga foetida	1.16558e-05	4.64676e-05
Syntrophorhabdus aromaticivorans	2.93015e-05	4.63933e-05
Lactobacillus mali	4.19289e-05	4.62632e-05
Zobellia galactanivorans	9.72324e-06	4.62408e-05
Flavihumibacter petaseus	1.85112e-05	4.62255e-05
Rufibacter sp. DG31D	1.47209e-05	4.61918e-05
Paenibacillus sp. Soil750	1.97051e-05	4.60734e-05
Caedibacter varicaedens	5.08707e-05	4.57628e-05
Bifidobacterium merycicum	1.34319e-05	4.56806e-05
Acinetobacter sp. NIPH 899	7.3559e-05	4.56161e-05
Roseivirga spongicola	1.67607e-05	4.56102e-05
Spirosoma panaciterrae	1.52665e-05	4.55837e-05
Epilithonimonas lactis	1.87829e-05	4.5582e-05
Streptococcus mitis	3.38631e-05	4.55817e-05
Rhodothermus marinus	1.87106e-05	4.55646e-05
[Eubacterium] yurii	1.37792e-05	4.55398e-05
Clostridium arbusti	1.72413e-05	4.53932e-05
Carnobacterium maltaromaticum	8.77642e-06	4.53923e-05
Algoriphagus vanfongensis	2.24648e-05	4.53462e-05
Bacillus sp. J37	2.00404e-05	4.51346e-05
Angiococcus disciformis	0.000120151	4.51233e-05
Rummeliibacillus stabekisii	0.000102577	4.47743e-05
Peptostreptococcus anaerobius	2.39226e-05	4.47151e-05
Thermoactinomyces daqus	3.28302e-05	4.46356e-05
Capnocytophaga ochracea	1.36089e-05	4.45621e-05
Desulfonatronospira thiodismutans	1.60649e-05	4.45342e-05
Thermoanaerobacter kivui	1.16689e-05	4.44405e-05
Paenibacillus senegalensis	2.22193e-05	4.43549e-05
Geoalkalibacter subterraneus	1.53874e-05	4.42833e-05
Anoxybacillus flavithermus	1.30068e-05	4.41931e-05
Robiginitalea biformata	1.28856e-05	4.41647e-05
Treponema lecithinolyticum	1.86314e-05	4.41562e-05
Winogradskyella psychrotolerans	8.96322e-06	4.40684e-05
Pedobacter sp. Leaf176	1.55183e-05	4.39241e-05
Halothermothrix orenii	1.77006e-05	4.39073e-05
Clostridium sp. HGF2	3.32227e-05	4.38854e-05
Trichococcus sp. R210	1.28623e-05	4.36772e-05
Thermicanus aegyptius	1.63428e-05	4.36719e-05
Erysipelothrix tonsillarum	1.23749e-05	4.36332e-05
Caenispirillum salinarum	5.1954e-05	4.36174e-05
Pontibacter sp. BAB1700	9.9502e-06	4.35798e-05
Mucilaginibacter sp. PAMC 26640	1.22591e-05	4.35672e-05
Clostridium sp. ND2	1.39118e-05	4.35022e-05
Thermincola ferriacetica	2.36828e-05	4.34849e-05
Mucilaginibacter gotjawali	1.26561e-05	4.34771e-05
Bacillus alveayuensis	1.29331e-05	4.318e-05
Cyclobacterium qasimii	1.99814e-05	4.28929e-05
Lactobacillus salivarius	1.64963e-05	4.27263e-05
Clostridium haemolyticum	3.34327e-05	4.2569e-05
Dyadobacter sp. Leaf189	1.646e-05	4.24525e-05
Capnocytophaga sp. oral taxon 326	1.34255e-05	4.23489e-05
Clostridium hydrogeniformans	1.4064e-05	4.23444e-05
Coprobacillus sp. D7	2.05659e-05	4.22873e-05
Streptococcus pyogenes	3.93062e-05	4.22179e-05
Hymenobacter swuensis	1.80533e-05	4.2185e-05
Flavobacterium johnsoniae	1.52984e-05	4.21505e-05
Clostridium sp. Ade.TY	1.13744e-05	4.21128e-05
Selenomonas artemidis	1.54037e-05	4.20913e-05
Paenibacillus durus	1.64118e-05	4.20476e-05
Spirosoma spitsbergense	1.66771e-05	4.20163e-05
Treponema putidum	8.39346e-06	4.19545e-05
Hymenobacter sp. PAMC 26628	8.49493e-06	4.18321e-05
Paenibacillus sp. FF9	1.30202e-05	4.18083e-05
Anaerococcus sp. MT16	1.68212e-05	4.15673e-05
Leptotrichia wadei	1.0213e-05	4.15558e-05
Actinomyces vaccimaxillae	1.79712e-05	4.13877e-05
Desulfosporosinus acidiphilus	1.28687e-05	4.13796e-05
Pedobacter oryzae	1.14016e-05	4.13431e-05
Rhodopirellula baltica	1.52465e-05	4.1257e-05
Selenomonas sp. oral taxon 138	1.24599e-05	4.12231e-05
Acinetobacter gerneri	7.17114e-05	4.09954e-05
Rhodopirellula islandica	2.84075e-05	4.09571e-05
Bacillus massiliosenegalensis	8.69311e-06	4.08867e-05
Aneurinibacillus migulanus	1.43184e-05	4.08856e-05
Desulfovirgula thermocuniculi	1.4759e-05	4.08311e-05
Cytophaga hutchinsonii	1.1351e-05	4.08281e-05
Aquimarina latercula	7.38376e-06	4.06987e-05
Clostridium baratii	1.1914e-05	4.06712e-05
Elizabethkingia sp. BM10	2.53165e-05	4.06561e-05
Oribacterium parvum	1.89051e-05	4.06084e-05
Chthonomonas calidirosea	1.84069e-05	4.06076e-05
Prochlorococcus sp. scB243_495I8	3.03972e-05	4.05911e-05
Lactobacillus delbrueckii	1.32389e-05	4.05582e-05
Flavobacterium sp. Leaf359	1.49082e-05	4.05543e-05
Thiorhodovibrio sp. 970	2.67272e-05	4.04687e-05
Fusobacterium ulcerans	8.74326e-06	4.03717e-05
Myroides odoratimimus	1.49416e-05	4.03409e-05
Elusimicrobium minutum	2.4829e-05	4.02841e-05
Parvimonas sp. oral taxon 110	5.83869e-06	4.01054e-05
Lactobacillus brevis	2.55269e-05	3.99549e-05
Mesorhizobium sp. LSJC255A00	5.8885e-05	3.97091e-05
Oribacterium sinus	1.04868e-05	3.96651e-05
Thermobacillus composti	1.70205e-05	3.94984e-05
Geobacillus kaustophilus	2.45932e-05	3.94629e-05
Leptonema illini	1.82328e-05	3.94286e-05
Geobacillus stearothermophilus	2.42996e-05	3.94147e-05
Bifidobacterium thermacidophilum	1.05335e-05	3.94131e-05
Collinsella sp. 4_8_47FAA	1.80281e-05	3.9363e-05
Trueperella pyogenes	4.65924e-06	3.93175e-05
Gracilimonas tropica	1.6632e-05	3.89892e-05
Paenibacillus sp. VKM B-2647	1.46335e-05	3.89713e-05
Collinsella stercoris	2.91341e-05	3.89511e-05
Desulfatirhabdium butyrativorans	1.20828e-05	3.89408e-05
Verrucomicrobium sp. 3C	3.75544e-05	3.89359e-05
Acinetobacter towneri	6.9591e-05	3.89355e-05
Pedobacter borealis	9.80636e-06	3.88811e-05
Lactobacillus selangorensis	3.9631e-05	3.87939e-05
Cesiribacter andamanensis	8.29266e-06	3.87205e-05
Turicibacter sanguinis	9.52049e-06	3.86711e-05
Galbibacter marinus	2.36135e-05	3.86392e-05
Desulfobacter curvatus	2.84592e-05	3.86261e-05
Peptoniphilus obesi	2.32567e-05	3.86028e-05
Capnocytophaga sp. oral taxon 329	7.58395e-06	3.85654e-05
Carnobacterium jeotgali	8.25138e-05	3.85496e-05
Bacillus niameyensis	1.04317e-05	3.85122e-05
Capnocytophaga sputigena	1.13746e-05	3.85045e-05
Saprospira grandis	9.42632e-06	3.83977e-05
Bacillus sp. FF3	6.95571e-06	3.83782e-05
Paenibacillus sp. AT5	1.73541e-05	3.82302e-05
Desulfosarcina cetonica	2.00604e-05	3.82037e-05
Acinetobacter tandoii	5.33806e-05	3.81754e-05
Mogibacterium timidum	1.16098e-05	3.81648e-05
Flexibacter elegans	1.5373e-05	3.81574e-05
Bilophila sp. 4_1_30	1.60991e-05	3.81541e-05
Weeksella virosa	1.74559e-05	3.80243e-05
Desulfosporosinus sp. OT	3.09996e-05	3.80083e-05
Echinicola pacifica	1.48946e-05	3.78892e-05
Pedobacter agri	1.6598e-05	3.78742e-05
Bacteroides sp. 2_1_22	1.48827e-05	3.77216e-05
Bacillus sp. FJAT-28004	1.58608e-05	3.75927e-05
Pedobacter kyungheensis	1.09512e-05	3.7587e-05
Slackia piriformis	1.01098e-05	3.75283e-05
Succinatimonas hippei	8.7741e-06	3.75162e-05
Desulfobulbus elongatus	1.59167e-05	3.74554e-05
Anditalea andensis	1.10911e-05	3.72983e-05
Myroides odoratus	8.50744e-06	3.72419e-05
Desulfatiglans anilini	1.5433e-05	3.71344e-05
Acinetobacter sp. NIPH 713	6.41008e-05	3.71194e-05
Rubinisphaera brasiliensis	2.17171e-05	3.70471e-05
Capnocytophaga haemolytica	1.24658e-05	3.70044e-05
Longilinea arvoryzae	1.46256e-05	3.6974e-05
Dyadobacter crusticola	1.11053e-05	3.69469e-05
Helcococcus kunzii	1.23191e-05	3.68837e-05
Pedobacter sp. BAL39	9.79446e-06	3.67822e-05
Clostridium autoethanogenum	2.44652e-05	3.67252e-05
Salinispira pacifica	1.40464e-05	3.67043e-05
Brevibacillus borstelensis	1.35883e-05	3.66994e-05
Paenibacillus dendritiformis	1.87039e-05	3.66971e-05
Mangrovimonas sp. ST2L15	9.96501e-06	3.66363e-05
Mariniradius saccharolyticus	1.63222e-05	3.65952e-05
Anaerostipes caccae	7.2093e-06	3.65435e-05
Bacillus sp. SA1-12	1.09825e-05	3.6499e-05
Paenibacillus sp. Soil724D2	1.42414e-05	3.64788e-05
Clostridium ventriculi	2.25914e-05	3.64286e-05
Sporolactobacillus terrae	2.58307e-05	3.64197e-05
pseudomallei group	2.2606e-05	3.63743e-05
Gemmata obscuriglobus	2.64105e-05	3.63556e-05
Pedobacter sp. BMA	8.24037e-06	3.63059e-05
Olsenella sp. SIT9	1.08443e-05	3.62615e-05
Actinobacillus minor	9.50095e-05	3.61965e-05
Porphyromonas sp. KLE 1280	1.1196e-05	3.61758e-05
Selenomonas noxia	1.23191e-05	3.61589e-05
Brevibacillus reuszeri	2.05202e-05	3.60853e-05
Terasakiella pusilla	3.94186e-05	3.60588e-05
Algoriphagus marincola	1.12302e-05	3.60248e-05
Acinetobacter sp. CIP 53.82	5.83731e-05	3.59513e-05
Paenibacillus sp. DMB5	1.52278e-05	3.59171e-05
Mesoflavibacter zeaxanthinifaciens	1.51282e-05	3.58863e-05
Enterococcus pallens	1.24818e-05	3.58153e-05
Nitritalea halalkaliphila	8.16686e-06	3.57305e-05
Bacillus clausii	2.79579e-05	3.56775e-05
Staphylococcus haemolyticus	2.67762e-05	3.56456e-05
Bacillus sp. FJAT-27916	8.73703e-06	3.56227e-05
Acinetobacter harbinensis	5.95712e-05	3.56082e-05
Phycisphaera mikurensis	2.03453e-05	3.5553e-05
Capnocytophaga granulosa	1.29695e-05	3.54619e-05
Hymenobacter norwichensis	9.14751e-06	3.54084e-05
Paenibacillus sp. UNC451MF	2.38249e-05	3.53693e-05
Streptococcus parasanguinis	3.2831e-05	3.53666e-05
Caldicellulosiruptor sp. Rt8.B8	9.82515e-06	3.51742e-05
Streptococcus gordonii	1.27352e-05	3.51561e-05
Clostridium paraputrificum	1.60003e-05	3.50911e-05
Acinetobacter sp. ETR1	5.91861e-05	3.50639e-05
Paenibacillus sp. 32O-W	5.10232e-06	3.5048e-05
Methanocorpusculum bavaricum	8.56095e-06	3.4992e-05
Psychrilyobacter atlanticus	1.13693e-05	3.49702e-05
Lysinibacillus odysseyi	4.04505e-05	3.49635e-05
Clostridium sp. 1_1_41A1FAA	1.27838e-05	3.48587e-05
Veillonella seminalis	1.27507e-05	3.47784e-05
Lactobacillus acidipiscis	4.30953e-05	3.47238e-05
Desulfotomaculum sp. 46_80	1.57764e-05	3.46747e-05
Kordia algicida	1.18148e-05	3.46457e-05
Arcobacter butzleri	1.96187e-05	3.4619e-05
Coxiella sp. DG_40	1.72652e-05	3.46176e-05
Dyadobacter alkalitolerans	1.28029e-05	3.45724e-05
Anaerococcus sp. PH9	2.8511e-05	3.45663e-05
Aphanocapsa montana	1.8193e-05	3.45306e-05
Clostridium argentinense	1.41281e-05	3.45107e-05
Acinetobacter sp. Root1280	5.53708e-05	3.44751e-05
Caulobacter henricii	1.85796e-05	3.44598e-05
Lactobacillus iners	2.62908e-05	3.4418e-05
Halonatronum saccharophilum	7.6366e-06	3.43645e-05
Bdellovibrio bacteriovorus	8.93103e-06	3.42997e-05
Desulfovibrio desulfuricans	2.46594e-05	3.42207e-05
Paenibacillus ginsengihumi	1.14165e-05	3.42003e-05
Thermovenabulum gondwanense	1.40954e-05	3.41728e-05
Pontibacter actiniarum	1.19911e-05	3.41245e-05
Clostridium sp. NCR	8.60977e-06	3.40835e-05
Paenibacillus sp. P1XP2	2.51035e-05	3.40687e-05
Selenomonas sp. oral taxon 892	1.09815e-05	3.4039e-05
Kurthia huakuii	6.58825e-05	3.40019e-05
Paenibacillus fonticola	1.1782e-05	3.3993e-05
Paenibacillus terrigena	1.76203e-05	3.39395e-05
Desulfosporosinus sp. I2	1.83406e-05	3.38567e-05
Anaerococcus hydrogenalis	1.6847e-05	3.38226e-05
Desulfovibrio piger	1.06286e-05	3.37416e-05
Bacillus sp. TH008	2.98673e-05	3.36473e-05
Bacillus azotoformans	1.27204e-05	3.35755e-05
Thermosediminibacter oceani	2.05048e-05	3.33999e-05
Paenibacillus chondroitinus	1.2851e-05	3.3339e-05
Lactobacillus camelliae	2.84465e-05	3.3294e-05
Leptotrichia sp. oral taxon 215	6.41187e-06	3.31969e-05
Gemmatimonas sp. SG8_28	1.9403e-05	3.31939e-05
Chryseobacterium caeni	9.67711e-06	3.3143e-05
Caldicellulosiruptor saccharolyticus	1.64607e-05	3.30837e-05
Capnocytophaga sp. oral taxon 412	6.7337e-06	3.30788e-05
Helicobacter sp. MIT 09-6949	1.39788e-05	3.30525e-05
Dyadobacter tibetensis	1.86957e-05	3.29125e-05
Gemmata sp. SH-PL17	1.51485e-05	3.27952e-05
Desulfomicrobium baculatum	1.13482e-05	3.27429e-05
Mucispirillum schaedleri	1.40343e-05	3.26606e-05
Trichodesmium erythraeum	1.43042e-05	3.26574e-05
Streptococcus oligofermentans	2.68413e-05	3.25804e-05
Streptococcus thermophilus	1.06933e-05	3.24879e-05
Bacillus okhensis	1.91533e-05	3.23724e-05
Bacillus smithii	1.53388e-05	3.23645e-05
Atopobium fossor	1.58509e-05	3.22311e-05
Paenibacillus sp. URHA0014	1.52583e-05	3.21687e-05
Leeuwenhoekiella blandensis	8.57344e-06	3.20213e-05
Pedobacter antarcticus	1.10184e-05	3.20026e-05
Streptococcus pseudopneumoniae	8.25551e-06	3.19274e-05
Bifidobacterium adolescentis	1.06568e-05	3.19035e-05
Leeuwenhoekiella sp. MAR_2009_132	8.28359e-06	3.19023e-05
Magnetospirillum gryphiswaldense	2.80562e-05	3.1825e-05
Filifactor alocis	6.21611e-06	3.17284e-05
Lactobacillus coryniformis	4.75852e-05	3.16863e-05
Syntrophomonas zehnderi	5.28049e-06	3.16704e-05
Syntrophus aciditrophicus	8.57883e-06	3.16697e-05
Exiguobacterium sp. S17	1.56511e-05	3.16617e-05
Flavobacterium sp. URHB0058	1.26942e-05	3.1567e-05
Smithella sp. SCADC	8.24776e-06	3.15476e-05
Desulfosporosinus sp. Tol-M	1.81558e-05	3.15041e-05
Aquimarina longa	2.67915e-05	3.14933e-05
Clostridium sp. mt5	7.85694e-06	3.14772e-05
Paenibacillus harenae	1.41606e-05	3.14685e-05
Leucobacter sp. Ag1	1.18845e-05	3.13954e-05
Cohnella thermotolerans	1.89293e-05	3.13766e-05
Oceanobacillus massiliensis	2.45002e-05	3.13646e-05
Roseivirga echinicomitans	1.74723e-05	3.13597e-05
Inquilinus limosus	1.63569e-05	3.13483e-05
Flavobacterium sp. Root420	4.68528e-06	3.12849e-05
Gemmatirosa kalamazoonesis	1.24009e-05	3.12702e-05
Methanobrevibacter sp. AbM4	1.95522e-05	3.12363e-05
Tumebacillus flagellatus	8.43316e-06	3.1205e-05
Chryseobacterium piperi	1.65386e-05	3.11468e-05
Caldilinea aerophila	1.80075e-05	3.11321e-05
Flavobacterium branchiophilum	6.32076e-06	3.10734e-05
Lysinibacillus fusiformis	6.75604e-05	3.10223e-05
Selenomonas sp. oral taxon 136	5.46002e-06	3.09976e-05
Paenibacillus sp. FJAT-27812	1.65529e-05	3.09769e-05
Algoriphagus terrigena	1.37032e-05	3.09159e-05
Clostridium sp. C8	1.15112e-05	3.09043e-05
Methanosphaera stadtmanae	3.42326e-05	3.07877e-05
Schlesneria paludicola	1.505e-05	3.07348e-05
Ewingella americana	1.32243e-05	3.07092e-05
Hymenobacter sp. DG25B	8.92272e-06	3.0696e-05
Paenibacillus sp. FSL H7-0357	1.1455e-05	3.05683e-05
Chryseobacterium soli	9.83152e-06	3.05559e-05
Chromobacterium piscinae	2.10374e-05	3.05405e-05
Desulfuromonas acetoxidans	1.46381e-05	3.0531e-05
Streptomyces sulphureus	3.28508e-05	3.04911e-05
Syntrophomonas palmitatica	1.87493e-05	3.0478e-05
Flavobacterium filum	1.07451e-05	3.04644e-05
Enterococcus casseliflavus	2.29198e-05	3.0395e-05
Sporosarcina koreensis	2.40101e-05	3.03924e-05
Salinimicrobium xinjiangense	1.22401e-05	3.03508e-05
Spirochaeta africana	8.80285e-06	3.03389e-05
Tenacibaculum ovolyticum	8.4929e-06	3.02524e-05
Acidaminococcus sp. HPA0509	8.74715e-06	3.02447e-05
Pedobacter sp. Leaf216	1.08259e-05	3.02263e-05
Parabacteroides sp. ASF519	2.88033e-05	3.01787e-05
Spirochaeta cellobiosiphila	8.08673e-06	3.00836e-05
Cohnella sp. VKM B-2846	1.40138e-05	3.00759e-05
Paenibacillus stellifer	9.19985e-06	3.00676e-05
Lactobacillus reuteri	1.23675e-05	3.00156e-05
Chryseobacterium aquaticum	9.9297e-06	3.00142e-05
Anaerococcus prevotii	1.42198e-05	3.00046e-05
Flavobacterium beibuense	1.15932e-05	2.9942e-05
Paenibacillus riograndensis	1.37692e-05	2.98353e-05
Nonlabens dokdonensis	1.22464e-05	2.98119e-05
Planktothrix agardhii	3.79602e-05	2.98075e-05
Acinetobacter sp. YZS-X1-1	5.27499e-05	2.97872e-05
Pelodictyon luteolum	1.38743e-05	2.97767e-05
Desulfuromonas sp. DDH964	1.05568e-05	2.96572e-05
Anoxybacillus tepidamans	2.06219e-05	2.96239e-05
Syntrophobacter fumaroxidans	1.38133e-05	2.96114e-05
Clostridium dakarense	9.18559e-06	2.95936e-05
Desulfovibrio sp. U5L	1.6375e-05	2.95643e-05
Thiohalocapsa sp. ML1	1.24066e-05	2.95442e-05
Jeotgalibacillus malaysiensis	1.91483e-05	2.95124e-05
Bacteroides sp. 2_1_56FAA	1.50565e-05	2.9506e-05
Flammeovirga pacifica	3.09436e-06	2.94723e-05
Chlorobium phaeobacteroides	5.7717e-06	2.9448e-05
Desulfotomaculum alkaliphilum	1.2282e-05	2.94286e-05
Pectobacterium carotovorum	1.64273e-05	2.94209e-05
Flavihumibacter sp. ZG627	1.17037e-05	2.9395e-05
Streptococcus oralis	7.68701e-06	2.93864e-05
Fictibacillus gelatini	1.37251e-05	2.93247e-05
Lactobacillus mucosae	7.04369e-06	2.93221e-05
Pedobacter cryoconitis	1.255e-05	2.93005e-05
Mycoplasma iowae	2.87402e-05	2.91979e-05
Leptotrichia sp. oral taxon 847	1.69222e-05	2.91512e-05
Acinetobacter haemolyticus	5.54814e-05	2.91065e-05
Clostridium sp. ATCC 25772	7.62293e-06	2.90905e-05
Psychroflexus tropicus	6.61203e-06	2.90239e-05
Bacillus circulans	1.47994e-05	2.8905e-05
Novispirillum itersonii	3.07964e-05	2.88773e-05
Acinetobacter sp. NIPH 2171	4.86378e-05	2.88128e-05
Flavobacterium sp. CF136	1.15283e-05	2.87567e-05
Bacillus endophyticus	2.62171e-05	2.87543e-05
Magnetospirillum sp. XM-1	1.81113e-05	2.86874e-05
Flavobacterium sp. KJJ	1.62998e-05	2.86596e-05
Parabacteroides sp. D25	1.26732e-05	2.8616e-05
Gramella forsetii	1.40669e-05	2.86158e-05
Veillonella sp. 3_1_44	7.8687e-06	2.86107e-05
Hymenobacter sp. MIMtkLc17	1.30595e-05	2.85807e-05
Peptostreptococcus stomatis	9.02365e-06	2.84842e-05
Polaribacter sp. Hel1_85	1.15646e-05	2.84833e-05
Desulfurispora thermophila	1.11389e-05	2.84441e-05
Bacillus shackletonii	8.88825e-06	2.83981e-05
Massilia sp. Root1485	5.2002e-05	2.83917e-05
Brevibacillus brevis	1.10757e-05	2.8379e-05
Sinorhizobium meliloti	1.73088e-05	2.83611e-05
Bifidobacterium cuniculi	1.70666e-05	2.83559e-05
Capnocytophaga sp. oral taxon 863	1.03907e-05	2.83243e-05
Acinetobacter sp. MII	4.3161e-05	2.83066e-05
Maribacter thermophilus	9.95657e-06	2.82785e-05
Sphingobacterium sp. IITKGP-BTPF85	6.64349e-06	2.82594e-05
Microbacterium sp. No. 7	9.61342e-06	2.8175e-05
Sphingobacterium sp. PM2-P1-29	8.72121e-06	2.805e-05
Desulfuromonas sp. WTL	1.72394e-05	2.80475e-05
Belliella baltica	1.32325e-05	2.8036e-05
Sellimonas intestinalis	4.11759e-06	2.80015e-05
Arcticibacter svalbardensis	1.0713e-05	2.79909e-05
Desulfococcus multivorans	8.23682e-06	2.79744e-05
Enterococcus hirae	2.45478e-05	2.79087e-05
Desulfosporosinus sp. HMP52	9.60359e-06	2.78156e-05
Bacillus sp. FF4	1.2956e-05	2.78105e-05
Atopobium rimae	8.76511e-06	2.78007e-05
Olsenella sp. DNF00959	9.24045e-06	2.77538e-05
Azospirillum brasilense	1.64134e-05	2.77425e-05
Legionella pneumophila	2.09413e-05	2.77236e-05
Collinsella intestinalis	6.01504e-06	2.77187e-05
Paenibacillus sp. FSL R7-269	1.0614e-05	2.76811e-05
Tuberibacillus calidus	1.04422e-05	2.7663e-05
Caldalkalibacillus thermarum	8.37393e-06	2.75729e-05
Acinetobacter sp. BMW17	4.99693e-05	2.75372e-05
Trichococcus sp. ES5	1.17918e-05	2.75314e-05
Paenibacillus sp. FSL H8-237	1.99737e-05	2.74774e-05
Atopobium sp. oral taxon 199	9.78879e-06	2.73929e-05
Erysipelatoclostridium ramosum	3.10629e-05	2.72825e-05
Paenibacillus sp. TCA20	1.51506e-05	2.72712e-05
Desmospora sp. 8437	6.02898e-06	2.72702e-05
Paenibacillus sp. GD11	1.47981e-05	2.72625e-05
Lutibacter sp. BRH_c52	9.62144e-06	2.72487e-05
Anaerococcus lactolyticus	1.27105e-05	2.72419e-05
Flavobacterium suncheonense	7.22153e-06	2.72407e-05
Epilithonimonas sp. FH1	8.8027e-06	2.7211e-05
Desulfurispirillum indicum	1.60111e-05	2.71872e-05
Brevibacillus thermoruber	1.56172e-05	2.71158e-05
Leptospira santarosai	3.57897e-05	2.70959e-05
Megasphaera micronuciformis	6.03419e-06	2.70914e-05
Methylocaldum szegediense	2.22363e-05	2.70577e-05
Peptoniphilus indolicus	9.05265e-06	2.70536e-05
Aminomonas paucivorans	9.68839e-06	2.70432e-05
Peptoniphilus duerdenii	1.47217e-05	2.70395e-05
Magnetococcus marinus	2.02531e-05	2.70171e-05
Trichococcus palustris	7.29747e-06	2.70029e-05
Effusibacillus pohliae	1.35499e-05	2.69781e-05
Klebsiella pneumoniae	1.14524e-05	2.69215e-05
Bergeyella zoohelcum	1.15156e-05	2.68936e-05
Ignavibacterium album	1.00075e-05	2.68715e-05
Indibacter alkaliphilus	1.12713e-05	2.68655e-05
Sphingobacterium sp. H1ai	1.40512e-05	2.68556e-05
Atopobium sp. oral taxon 810	1.069e-05	2.67892e-05
Desulfovibrio africanus	1.23099e-05	2.67365e-05
Fusobacterium periodonticum	9.95393e-06	2.6698e-05
Clostridium algidicarnis	7.06455e-06	2.66812e-05
Pseudomonas putida group	6.62306e-06	2.66437e-05
Pseudomonas syringae group	6.35073e-06	2.65344e-05
Bacillus farraginis	1.0943e-05	2.64614e-05
Desulfonatronum thiodismutans	1.00855e-05	2.63683e-05
Collinsella sp. MS5	9.94066e-06	2.63293e-05
Roseivirga sp. D-25	1.08361e-05	2.62896e-05
Levilinea saccharolytica	8.97354e-06	2.61877e-05
Methanomicrobium mobile	6.52831e-06	2.61783e-05
Bacteriovorax sp. BAL6_X	2.39621e-05	2.61626e-05
Fusobacterium varium	5.11504e-06	2.61455e-05
Bacillus coahuilensis	1.35526e-05	2.61188e-05
Clostridium ljungdahlii	9.39734e-06	2.61058e-05
Flavobacterium rivuli	1.11331e-05	2.61049e-05
Parachlamydia acanthamoebae	9.24926e-06	2.60942e-05
Bacillus flexus	1.3882e-05	2.60886e-05
Rhodopirellula europaea	1.19125e-05	2.60688e-05
Brachyspira hyodysenteriae	9.40726e-06	2.60182e-05
Gallibacterium anatis	1.81487e-05	2.6006e-05
Spirochaeta alkalica	7.61518e-06	2.60038e-05
Thermoanaerobacterium xylanolyticum	6.02597e-06	2.5949e-05
Vibrio vulnificus	2.81879e-05	2.59451e-05
Endomicrobium proavitum	9.12851e-06	2.59423e-05
Croceitalea dokdonensis	1.21105e-05	2.59279e-05
Microcystis aeruginosa	6.61642e-06	2.5925e-05
Formosa algae	5.90799e-06	2.5886e-05
Thiovulum sp. ES	2.6955e-05	2.58601e-05
Bifidobacterium boum	5.5936e-06	2.58565e-05
Hymenobacter sp. DG5B	9.40062e-06	2.58381e-05
Fimbriimonas ginsengisoli	2.33999e-05	2.58235e-05
Rhodonellum psychrophilum	8.88524e-06	2.58174e-05
Nonlabens ulvanivorans	8.18548e-06	2.58117e-05
Bacillus decisifrondis	1.55068e-05	2.58114e-05
Pelobacter seleniigenes	9.95222e-06	2.57404e-05
Bhargavaea cecembensis	7.9542e-06	2.57312e-05
Maribacter antarcticus	1.36275e-05	2.5696e-05
Muricauda sp. MAR_2010_75	5.57759e-06	2.56911e-05
Hymenobacter sp. IS2118	1.49878e-05	2.56833e-05
Gemmatimonas sp. SM23_52	1.53547e-05	2.56291e-05
Smithella sp. SDB	1.34027e-05	2.56061e-05
Deferribacter desulfuricans	1.98503e-05	2.56026e-05
Helcococcus sueciensis	6.91703e-06	2.55591e-05
Turicibacter sp. HGF1	1.28413e-05	2.55036e-05
Calditerrivibrio nitroreducens	1.06961e-05	2.5445e-05
Viridibacillus arenosi	5.34241e-05	2.54382e-05
Desulfonatronovibrio magnus	1.39705e-05	2.54286e-05
Pedobacter arcticus	4.37751e-06	2.54042e-05
Aminiphilus circumscriptus	1.14101e-05	2.54002e-05
Paenibacillus sp. MSt1	1.21817e-05	2.53472e-05
Pelobacter carbinolicus	1.06032e-05	2.53277e-05
Streptococcus uberis	1.93488e-05	2.53115e-05
Limnochorda pilosa	1.10294e-05	2.52924e-05
Paenibacillus sp. DMB20	1.39778e-05	2.52916e-05
Bacillus trypoxylicola	2.78414e-05	2.52652e-05
Arthrobacter sp. EpRS71	1.06146e-05	2.52489e-05
Ralstonia solanacearum	1.4872e-05	2.52442e-05
Bacillus niacini	1.03825e-05	2.52245e-05
Veillonella magna	7.41029e-06	2.5168e-05
Paenibacillus pasadenensis	6.973e-06	2.51e-05
Thermosipho africanus	1.41865e-05	2.50847e-05
Moorella sp. 60_41	1.29832e-05	2.50729e-05
Leptotrichia goodfellowii	1.75054e-05	2.50699e-05
Chlorobium limicola	8.63106e-06	2.50677e-05
Caldicellulosiruptor hydrothermalis	1.04325e-05	2.50612e-05
Chloracidobacterium thermophilum	1.32801e-05	2.49814e-05
Bacillus cellulosilyticus	1.44215e-05	2.49663e-05
Pelobacter propionicus	1.05196e-05	2.49634e-05
Thermaerobacter marianensis	1.87106e-05	2.492e-05
Thermoanaerobacter thermocopriae	1.3709e-05	2.48731e-05
Lactobacillus fuchuensis	3.58696e-05	2.48556e-05
Desulfovibrio sp. 6_1_46AFAA	6.71238e-06	2.48533e-05
Necropsobacter massiliensis	4.95465e-05	2.47747e-05
Sporomusa sp. An4	1.55877e-05	2.47674e-05
Desulfotomaculum alcoholivorax	1.26764e-05	2.4742e-05
Paenibacillus wynnii	1.16597e-05	2.47255e-05
Neisseria meningitidis	1.17339e-05	2.47115e-05
Oribacterium sp. oral taxon 108	1.10101e-05	2.4701e-05
Desulforegula conservatrix	9.33877e-06	2.46996e-05
Chitinivibrio alkaliphilus	1.47619e-05	2.4631e-05
Methanosarcina mazei	1.29931e-05	2.46215e-05
Desulfococcus oleovorans	1.21653e-05	2.45961e-05
Enorma massiliensis	6.19805e-06	2.45876e-05
Azospirillum lipoferum	9.96377e-06	2.45461e-05
Hymenobacter sp. PAMC 26554	1.18867e-05	2.45335e-05
Paenibacillus beijingensis	1.58475e-05	2.45125e-05
Streptomyces sp. NRRL F-6131	2.23651e-05	2.44797e-05
Mesonia mobilis	9.81274e-06	2.44016e-05
Spirosoma radiotolerans	8.64893e-06	2.42868e-05
Deinococcus pimensis	9.94947e-06	2.42731e-05
Lactobacillus jensenii	2.86494e-05	2.42427e-05
Sphingobacterium sp. ML3W	1.02482e-05	2.42272e-05
Bacillus kribbensis	7.01838e-06	2.41914e-05
Acetohalobium arabaticum	1.40583e-05	2.41713e-05
Petrotoga mobilis	2.07619e-05	2.41202e-05
Facklamia sourekii	4.14952e-05	2.40771e-05
Magnetospira sp. QH-2	2.70973e-05	2.40493e-05
Geobacter daltonii	1.06571e-05	2.4037e-05
Gemmata sp. IIL30	8.09645e-06	2.4023e-05
Desulfosporosinus meridiei	7.09344e-06	2.40169e-05
Desulfotomaculum thermocisternum	4.04136e-06	2.396e-05
Lactobacillus ceti	1.17517e-05	2.39454e-05
Ilyobacter polytropus	1.0836e-05	2.39007e-05
Bacillus simplex	1.49146e-05	2.38937e-05
Peptoniphilus lacrimalis	1.34219e-05	2.37996e-05
Chlorobium chlorochromatii	1.24434e-05	2.37811e-05
Amphibacillus xylanus	5.39396e-06	2.37701e-05
Geobacter uraniireducens	9.8756e-06	2.37654e-05
Acinetobacter sp. HA	4.2207e-05	2.37508e-05
Lactobacillus helveticus	1.71626e-05	2.37457e-05
Phaeospirillum fulvum	9.70707e-06	2.37456e-05
Bacillus vietnamensis	8.37037e-06	2.37423e-05
Leucobacter chromiiresistens	9.78754e-06	2.37394e-05
Chryseobacterium gleum	9.65288e-06	2.36563e-05
Hymenobacter sp. APR13	9.74267e-06	2.36533e-05
Lactobacillus farraginis	3.4789e-05	2.36192e-05
Cellulomonas carbonis	1.146e-05	2.35936e-05
Helicobacter cinaedi	1.10875e-05	2.35491e-05
Desulfuromonas sp. SDB	7.27379e-06	2.35303e-05
Desulfocurvus vexinensis	9.45823e-06	2.35265e-05
Myroides injenensis	9.1146e-06	2.34628e-05
Chryseobacterium sp. Leaf404	7.55959e-06	2.33677e-05
Alicyclobacillus macrosporangiidus	1.23553e-05	2.33278e-05
Clostridium senegalense	9.16337e-06	2.33261e-05
Hydrogenivirga sp. 128-5-R1-1	1.26796e-05	2.3288e-05
Tamlana nanhaiensis	6.92496e-06	2.32807e-05
Chlorobaculum parvum	7.55594e-06	2.32673e-05
Desulfovermiculus halophilus	9.90478e-06	2.32402e-05
Brachyspira pilosicoli	8.58579e-06	2.31619e-05
Flavobacterium subsaxonicum	8.82736e-06	2.31567e-05
Moorella glycerini	8.71184e-06	2.31236e-05
Paenibacillus sp. A3	1.58374e-05	2.30585e-05
Desulfobulbus sp. Tol-SR	1.85046e-05	2.30265e-05
Aeromonas hydrophila	2.93785e-05	2.30062e-05
Planomicrobium glaciei	8.57998e-06	2.28886e-05
Desulfitobacterium dehalogenans	1.85102e-05	2.28086e-05
Fictibacillus macauensis	4.88983e-05	2.27873e-05
Desulfocarbo indianensis	1.10928e-05	2.27812e-05
Desulfarculus baarsii	1.54716e-05	2.27502e-05
Atopobium parvulum	1.03443e-05	2.27386e-05
Spirochaeta lutea	6.63057e-06	2.26926e-05
Aneurinibacillus soli	1.43511e-05	2.26303e-05
Cohnella laeviribosi	4.9972e-06	2.25995e-05
Algoriphagus mannitolivorans	5.7984e-06	2.25918e-05
Anaerolinea thermophila	1.70448e-05	2.25503e-05
Paenibacillus sp. FSL R7-277	7.38079e-06	2.25296e-05
Desulfovibrio bastinii	9.68384e-06	2.24862e-05
Aquimarina muelleri	1.50465e-05	2.24614e-05
Acinetobacter sp. VT 511	3.85399e-05	2.24318e-05
Desulfotomaculum hydrothermale	1.10801e-05	2.23653e-05
Lachnoanaerobaculum sp. ICM7	7.14418e-06	2.2325e-05
[Haemophilus] ducreyi	5.81609e-05	2.22327e-05
Fusobacterium hwasookii	1.77004e-05	2.22116e-05
Cellulophaga baltica	1.89932e-05	2.21733e-05
Weeksella sp. FF8	1.38586e-05	2.21535e-05
Smithella sp. F21	1.94115e-05	2.21418e-05
Paenibacillus sonchi	1.8469e-05	2.21068e-05
Waddlia chondrophila	8.15167e-06	2.20416e-05
Prosthecochloris aestuarii	1.08576e-05	2.20366e-05
Verrucomicrobia subdivision 6	1.2664e-05	2.20212e-05
Eggerthella lenta	9.64985e-06	2.19965e-05
Desulfobacter postgatei	1.12786e-05	2.19854e-05
Caldibacillus debilis	7.4768e-06	2.19445e-05
Lactobacillus oris	2.61588e-05	2.18875e-05
Geobacter lovleyi	6.15513e-06	2.18786e-05
Veillonella tobetsuensis	5.36748e-06	2.18784e-05
Paenibacillus sp. IHB B 3415	9.43688e-06	2.18508e-05
Lachnoanaerobaculum sp. OBRC5-5	5.13972e-06	2.18318e-05
Tenacibaculum maritimum	1.06686e-05	2.18242e-05
Planococcus rifietoensis	1.03209e-05	2.17815e-05
Paenibacillus sp. FSL R7-0331	1.13616e-05	2.17773e-05
Enterococcus gilvus	1.37363e-05	2.17564e-05
Bacillus sp. LL01	1.66674e-05	2.17353e-05
Desulfuromonas sp. TF	9.37786e-06	2.16467e-05
Paenibacillus sp. SIT18	1.06355e-05	2.16176e-05
Bacteroides sp. SM1_62	9.36e-06	2.15296e-05
Geobacter pickeringii	7.20022e-06	2.14998e-05
Bacillus glycinifermentans	1.07008e-05	2.14781e-05
Alicyclobacillus sendaiensis	6.47016e-06	2.14446e-05
Flavobacterium frigidarium	1.5334e-05	2.13963e-05
Flavobacterium sp. MEB061	7.08879e-06	2.1384e-05
Aquimarina pacifica	7.27924e-06	2.13777e-05
Bacillus massilioanorexius	8.05765e-06	2.13277e-05
Psychroserpens jangbogonensis	9.67299e-06	2.12963e-05
Bifidobacterium pseudocatenulatum	6.98829e-06	2.12645e-05
Desulfitobacterium sp. PCE1	9.43835e-06	2.12488e-05
Paraburkholderia kururiensis	3.50969e-05	2.11982e-05
Lactobacillus gasseri	2.18835e-05	2.11621e-05
Hymenobacter aerophilus	1.45101e-05	2.11456e-05
Paenibacillus sp. FSL H8-457	1.48374e-05	2.11023e-05
Pedobacter sp. Leaf41	7.38511e-06	2.10879e-05
Flavobacterium sasangense	4.00773e-06	2.1074e-05
Peptoniphilus rhinitidis	9.71468e-06	2.10618e-05
Roseivirga ehrenbergii	6.99735e-06	2.1032e-05
Paenibacillus sp. FSL P4-0081	1.19682e-05	2.10104e-05
Arenibacter certesii	9.65879e-06	2.09825e-05
Acinetobacter junii	2.78812e-05	2.09654e-05
Bacillus sp. UNC41MFS5	1.34031e-05	2.08605e-05
Leptotrichia buccalis	5.39116e-06	2.07921e-05
Riemerella anatipestifer	8.96676e-06	2.07895e-05
Geobacillus sp. 8	6.73824e-06	2.07584e-05
Imtechella halotolerans	4.21045e-06	2.07465e-05
Flavobacterium reichenbachii	9.44289e-06	2.07436e-05
Flavobacterium gelidilacus	7.06457e-06	2.07419e-05
Geoalkalibacter ferrihydriticus	1.24528e-05	2.07318e-05
Alicyclobacillus acidoterrestris	1.36873e-05	2.07132e-05
Peptoniphilus sp. ChDC B134	1.94044e-05	2.0712e-05
Alicyclobacillus contaminans	1.05476e-05	2.07074e-05
Desulfovibrio vulgaris	1.08113e-05	2.06893e-05
Flavobacterium enshiense	6.30495e-06	2.06811e-05
Bacillus sp. FJAT-26652	1.95083e-05	2.06777e-05
Dongia sp. URHE0060	1.59413e-05	2.06773e-05
Leptotrichia trevisanii	8.39436e-06	2.06564e-05
Flavobacterium sp. ABG	9.1878e-06	2.06353e-05
Listeria fleischmannii	2.00214e-05	2.06277e-05
Desulfonatronum thioautotrophicum	7.02047e-06	2.06197e-05
Paenibacillus sp. G4	1.82415e-05	2.05964e-05
Cetobacterium somerae	3.56045e-06	2.05471e-05
Allofustis seminis	1.02292e-05	2.05366e-05
Desulfovibrio aminophilus	1.06963e-05	2.05303e-05
Chlorobium sp. GBChlB	1.01617e-05	2.05207e-05
Bacillus methanolicus	7.80376e-06	2.0515e-05
Lysinibacillus massiliensis	4.75501e-06	2.04695e-05
Bifidobacterium gallicum	5.49394e-06	2.04525e-05
Carboxydothermus hydrogenoformans	4.94965e-06	2.04427e-05
Peptoniphilus sp. BV3AC2	6.35208e-06	2.04302e-05
Capnocytophaga sp. oral taxon 324	1.11969e-05	2.04282e-05
Aquimarina agarivorans	5.17021e-06	2.04121e-05
Paenibacillus sp. Soil522	7.45431e-06	2.04066e-05
Aneurinibacillus aneurinilyticus	4.18584e-06	2.02842e-05
Jonquetella anthropi	1.74844e-05	2.02719e-05
Intestinibacter bartlettii	7.12584e-06	2.02599e-05
Ardenticatena maritima	7.63214e-06	2.02223e-05
Smithella sp. ME-1	6.92834e-06	2.01555e-05
Streptococcus mutans	5.11644e-06	2.01541e-05
Desulfatitalea tepidiphila	9.10152e-06	2.01421e-05
Chromobacterium subtsugae	4.64435e-05	2.0139e-05
Roseiflexus castenholzii	1.26833e-05	2.0133e-05
Cryobacterium sp. MLB-32	1.30913e-05	2.01223e-05
Paenibacillus massiliensis	8.62601e-06	2.01186e-05
Skermanella aerolata	1.78985e-05	2.00862e-05
Clostridium sp. L74	8.94503e-06	2.00727e-05
Leeuwenhoekiella sp. Hel_I_48	6.44707e-06	2.00495e-05
Geobacter soli	1.02231e-05	2.0048e-05
Chryseobacterium sp. OV705	1.49925e-05	2.00427e-05
Bellilinea caldifistulae	6.35224e-06	2.00409e-05
Sporosarcina globispora	1.60949e-05	2.00239e-05
Chryseobacterium koreense	7.68762e-06	1.99621e-05
Flavobacterium soli	1.20001e-05	1.99574e-05
Anaeroglobus geminatus	6.50618e-06	1.99267e-05
Coriobacterium glomerans	5.48534e-06	1.98985e-05
Pediococcus acidilactici group	2.69561e-05	1.9898e-05
Thermoanaerobacter thermohydrosulfuricus	1.85661e-05	1.98876e-05
Rhodospirillum rubrum	2.85501e-05	1.98839e-05
Bifidobacterium saguini	7.07918e-06	1.9883e-05
Aneurinibacillus tyrosinisolvens	1.07921e-05	1.98728e-05
Ktedonobacter racemifer	4.85347e-06	1.98358e-05
Bacillus aryabhattai	2.71285e-05	1.98012e-05
Desulfocapsa sulfexigens	8.48845e-06	1.97983e-05
Streptococcus sp. FF10	1.72075e-05	1.97473e-05
Paenibacillus jamilae	1.28377e-05	1.97454e-05
Gillisia sp. JM1	7.16555e-06	1.97201e-05
Thalassobacillus devorans	1.08282e-05	1.9693e-05
Veillonella sp. ICM51a	7.14685e-06	1.96904e-05
Kosmotoga olearia	7.12018e-06	1.9686e-05
Syntrophothermus lipocalidus	9.15078e-06	1.96286e-05
Thioflavicoccus mobilis	9.95887e-06	1.95938e-05
Desulfurobacterium thermolithotrophum	1.04697e-05	1.95857e-05
Defluviitoga tunisiensis	1.74547e-05	1.95745e-05
Bacillus sp. SIT10	6.14407e-06	1.95707e-05
Capnocytophaga sp. CM59	7.70481e-06	1.95541e-05
Bacillus sp. LF1	1.4827e-05	1.95113e-05
Paenibacillus darwinianus	5.47448e-06	1.95007e-05
Muricauda ruestringensis	9.49568e-06	1.94983e-05
Algibacter sp. HZ22	8.54972e-06	1.94879e-05
Desulfotignum phosphitoxidans	8.52131e-06	1.94479e-05
Anaerococcus tetradius	8.76477e-06	1.9445e-05
Desulfitibacter sp. BRH_c19	5.78093e-06	1.94347e-05
Methanomassiliicoccus luminyensis	1.11437e-05	1.94078e-05
Arcobacter lanthieri	2.08908e-05	1.94016e-05
Paenibacillus popilliae	1.7323e-05	1.93883e-05
Tenacibaculum sp. 47A_GOM-205m	9.08158e-06	1.93841e-05
Methanobacterium paludis	6.00222e-06	1.93329e-05
Streptococcus porci	7.2454e-06	1.92968e-05
Campylobacter coli	8.12716e-06	1.92661e-05
Desulfobacterium autotrophicum	7.13245e-06	1.92063e-05
Vitellibacter sp. D-24	7.33324e-06	1.91912e-05
Desulfatitalea sp. BRH_c12	6.55585e-06	1.91506e-05
Streptococcus ovis	4.8048e-06	1.91475e-05
Kosmotoga pacifica	1.05937e-05	1.91446e-05
Weissella cibaria	3.36088e-05	1.91371e-05
Carboxydothermus ferrireducens	5.59966e-06	1.91247e-05
Zobellia uliginosa	5.18181e-06	1.91165e-05
Flavobacterium succinicans	6.74943e-06	1.91104e-05
Promicromonospora kroppenstedtii	1.32451e-05	1.91087e-05
Pedobacter sp. Leaf194	5.60298e-06	1.91053e-05
Chlorobium ferrooxidans	1.022e-05	1.91028e-05
Nonlabens sp. YIK11	1.04473e-05	1.90558e-05
Pelodictyon phaeoclathratiforme	9.75841e-06	1.90239e-05
Muricauda lutaonensis	6.54953e-06	1.90192e-05
Paenibacillus ehimensis	7.95868e-06	1.90192e-05
Paenibacillus peoriae	1.57729e-05	1.90173e-05
Dethiosulfatarculus sandiegensis	3.55052e-06	1.90097e-05
Bacillus sp. KCTC 13219	1.73404e-05	1.89924e-05
Geobacter metallireducens	8.49698e-06	1.89905e-05
Ornatilinea apprima	3.55292e-06	1.89884e-05
Aquimarina macrocephali	5.08037e-06	1.89607e-05
Paenibacillus sp. FJAT-22460	2.28685e-05	1.89508e-05
Paenibacillus jilunlii	8.02826e-06	1.89442e-05
Tamlana sedimentorum	1.63458e-05	1.89108e-05
Paenibacillus sp. HGF5	9.62955e-06	1.88476e-05
Anaerobaculum hydrogeniformans	7.47258e-06	1.88322e-05
Rahnella sp. WP5	4.52252e-05	1.88254e-05
Atopobium minutum	1.63862e-05	1.88069e-05
Bacteroides sp. D1	1.01289e-05	1.87826e-05
Pedobacter sp. R20-19	5.23744e-06	1.87813e-05
Paenibacillus sp. Leaf72	6.50523e-06	1.87479e-05
Helicobacter suis	4.32664e-06	1.87354e-05
Enterobacter sp. EGD-HP1	2.74458e-06	1.8734e-05
Terracidiphilus gabretensis	1.21446e-05	1.8723e-05
Gemella haemolysans	1.13389e-05	1.87091e-05
Selenomonas sp. FOBRC6	9.80555e-06	1.86954e-05
Streptococcus equi	4.10398e-05	1.869e-05
Bacillus sp. FJAT-25509	8.73468e-06	1.86813e-05
Bacillus bogoriensis	4.61315e-06	1.8674e-05
Flavobacterium sp. 316	1.35069e-05	1.86722e-05
Chryseobacterium luteum	6.15722e-06	1.86551e-05
Formosa sp. AK20	5.97813e-06	1.86496e-05
Joostella marina	6.53514e-06	1.86225e-05
Megasphaera sp. BL7	9.05967e-06	1.86043e-05
Campylobacter gracilis	7.74501e-06	1.85956e-05
Lactobacillus paralimentarius	1.17128e-05	1.85851e-05
Atopobium vaginae	1.16448e-05	1.85752e-05
Flavobacterium hydatis	7.81161e-06	1.85694e-05
Gracilibacillus lacisalsi	5.51769e-06	1.85486e-05
Yersinia enterocolitica	1.50404e-05	1.84933e-05
Mesotoga infera	1.02806e-05	1.84728e-05
Geobacter sp. OR-1	9.61279e-06	1.8414e-05
Paenibacillus sp. MT18	9.20496e-06	1.84103e-05
Paenibacillus sp. G1	7.32561e-06	1.8406e-05
Aquimarina agarilytica	7.41473e-06	1.83703e-05
Brevibacillus massiliensis	1.13833e-05	1.83679e-05
Aneurinibacillus terranovensis	5.53836e-06	1.83556e-05
Polaribacter sp. Hel_I_88	1.18221e-05	1.83467e-05
Gaetbulibacter saemankumensis	7.9726e-06	1.83043e-05
Chryseobacterium sp. Leaf394	1.39014e-05	1.83027e-05
Aneurinibacillus sp. XH2	7.13173e-06	1.82786e-05
Geobacter sp. M18	5.77229e-06	1.82502e-05
Hahella ganghwensis	1.12325e-05	1.8245e-05
Treponema medium	5.90714e-06	1.82314e-05
Bacillus sp. B-jedd	4.35211e-06	1.82076e-05
Desulfurobacterium sp. TC5-1	7.5196e-06	1.8185e-05
Capnocytophaga sp. oral taxon 335	7.62659e-06	1.81546e-05
Maribacter sp. Hel_I_7	8.51297e-06	1.81335e-05
Lutibacter sp. LP1	4.92484e-06	1.81239e-05
Chryseobacterium sp. StRB126	9.55933e-06	1.81023e-05
Halobacteroides halobius	1.76841e-05	1.80934e-05
Bifidobacterium stellenboschense	1.5914e-05	1.79891e-05
Oceanibaculum indicum	1.80694e-05	1.79484e-05
Acinetobacter radioresistens	3.43727e-05	1.79299e-05
Phaeospirillum molischianum	1.95156e-05	1.7925e-05
Francisella philomiragia	1.23066e-05	1.78972e-05
Desulfatibacillum alkenivorans	1.01762e-05	1.7848e-05
Thermoanaerobacterium saccharolyticum	7.0726e-06	1.7842e-05
Paenibacillus sp. Soil787	9.93782e-06	1.77704e-05
Eudoraea adriatica	5.56431e-06	1.77213e-05
Flavobacterium limnosediminis	5.51422e-06	1.76957e-05
Lactobacillus hayakitensis	8.06979e-06	1.7686e-05
Bacillus sp. MB2021	9.83203e-06	1.76818e-05
Desulfomicrobium escambiense	7.60977e-06	1.76774e-05
Bacillus ligniniphilus	1.49081e-05	1.76687e-05
Actinobacillus capsulatus	7.22127e-06	1.76557e-05
Streptococcus henryi	7.63496e-06	1.76505e-05
Lactobacillus acidophilus	7.04112e-06	1.76464e-05
Desulfomonile tiedjei	6.73889e-06	1.7631e-05
Flavobacterium indicum	1.02017e-05	1.76103e-05
Gemella bergeri	1.99516e-05	1.75848e-05
Zhouia amylolytica	6.38787e-06	1.75844e-05
Bacillus sp. FJAT-27251	1.19702e-05	1.75586e-05
Marinobacterium sp. AK27	8.79374e-06	1.75315e-05
Dethiosulfovibrio peptidovorans	6.87911e-06	1.75156e-05
Chrysiogenes arsenatis	8.17641e-06	1.74945e-05
Thiorhodococcus sp. AK35	7.16635e-06	1.74757e-05
Aminobacterium colombiense	1.0415e-05	1.74649e-05
Thermoactinomyces vulgaris	5.32367e-06	1.74547e-05
Chryseobacterium daeguense	7.27784e-06	1.73845e-05
Bacillus sp. URHB0009	5.31929e-06	1.73751e-05
Geobacter sulfurreducens	9.97019e-06	1.73739e-05
Lactococcus raffinolactis	1.19703e-05	1.73616e-05
Polaribacter sp. Hel1_33_49	6.88273e-06	1.7353e-05
Flavobacterium seoulense	4.8674e-06	1.73112e-05
Thermosipho melanesiensis	1.19178e-05	1.72796e-05
Methanocorpusculum labreanum	8.42165e-06	1.72683e-05
Alicyclobacillus acidocaldarius	8.32692e-06	1.72544e-05
Arenibacter latericius	4.1586e-06	1.72091e-05
Methanobacterium sp. MB1	1.09448e-05	1.72089e-05
Kyrpidia tusciae	4.15713e-06	1.71922e-05
Bacillus atrophaeus	2.03391e-05	1.71744e-05
Flavobacterium sp. AED	5.8378e-06	1.71246e-05
Cyanothece sp. PCC 7424	2.51507e-05	1.71126e-05
Gelidibacter mesophilus	9.16859e-06	1.71027e-05
Streptococcus pasteurianus	1.03987e-05	1.70762e-05
Gracilibacillus halophilus	1.7062e-05	1.70541e-05
Pararhodospirillum photometricum	1.83149e-05	1.70482e-05
Veillonella sp. 6_1_27	2.0912e-05	1.70479e-05
Lactobacillus fermentum	1.02884e-05	1.7025e-05
Saccharibacillus sacchari	4.56277e-06	1.69945e-05
Acinetobacter sp. CIP 51.11	3.03636e-05	1.69588e-05
Marinitoga piezophila	4.46759e-06	1.69571e-05
Selenomonas sp. oral taxon 149	5.60381e-06	1.69512e-05
Nitrolancea hollandica	1.78695e-05	1.69238e-05
Paenibacillus pinihumi	7.84009e-06	1.69154e-05
Morganella morganii	6.13247e-06	1.69114e-05
spotted fever group	1.78885e-05	1.68784e-05
Vulgatibacter incomptus	1.08592e-05	1.68289e-05
Winogradskyella sp. PG-2	5.56166e-06	1.67909e-05
Dehalobacter restrictus	5.98334e-06	1.67586e-05
Prevotella sp. Sc00026	6.42003e-06	1.67484e-05
Shewanella xiamenensis	3.47378e-06	1.67414e-05
Natranaerobius thermophilus	5.72678e-06	1.67331e-05
Bacillus rubiinfantis	6.38959e-06	1.67207e-05
Bacillus sp. REN51N	1.63395e-05	1.67184e-05
Streptococcus entericus	1.19682e-05	1.66848e-05
Lactobacillus saerimneri	4.45152e-06	1.66821e-05
Paenibacillus sp. FSL R7-0273	1.06743e-05	1.66769e-05
Carnobacterium gallinarum	8.32729e-06	1.66206e-05
Denitrovibrio acetiphilus	1.38526e-05	1.66143e-05
Acinetobacter venetianus	2.46586e-05	1.66056e-05
Dictyoglomus thermophilum	5.77884e-06	1.65987e-05
Dokdonia sp. 4H-3-7-5	7.18929e-06	1.65836e-05
Bifidobacterium reuteri	8.57703e-06	1.65825e-05
Bacillus humi	1.15124e-05	1.65227e-05
Desulfovibrio inopinatus	7.79843e-06	1.65073e-05
Methylobacterium aquaticum	1.75042e-05	1.65056e-05
Clostridium sp. K25	8.33928e-06	1.6497e-05
Tepidibacillus sp. Z9	6.21168e-06	1.64842e-05
Bacillus ginsengihumi	6.10359e-06	1.64675e-05
Paenibacillus sp. FSL R5-0912	6.3613e-06	1.64252e-05
Desulfotignum balticum	7.54135e-06	1.64249e-05
Desulfotomaculum sp. 46_296	6.50149e-06	1.64198e-05
Desulfovibrio sp. 3_1_syn3	9.25139e-06	1.64162e-05
Massilia sp. JS1662	7.97866e-06	1.6415e-05
Lactobacillus crispatus	1.29618e-05	1.64049e-05
Cellulophaga sp. Hel_I_12	7.8266e-06	1.63858e-05
Caldicellulosiruptor kronotskyensis	1.26318e-05	1.63802e-05
Plesiocystis pacifica	7.91957e-06	1.63574e-05
Selenomonas flueggei	5.62585e-06	1.6357e-05
Capnocytophaga gingivalis	6.44437e-06	1.6326e-05
Paenibacillus borealis	9.59723e-06	1.63071e-05
Staphylococcus hyicus	1.56077e-05	1.63012e-05
Peptoniphilus grossensis	8.71354e-06	1.62815e-05
Anaerococcus provenciensis	8.33669e-06	1.62686e-05
Pseudodonghicola xiamenensis	3.06454e-05	1.62629e-05
Acinetobacter rudis	2.36411e-05	1.61384e-05
Sulfuricella denitrificans	5.14446e-06	1.61307e-05
Selenomonas sp. FOBRC9	8.00348e-06	1.61246e-05
Streptococcus merionis	4.1579e-06	1.6084e-05
Aeromonas veronii	1.52958e-05	1.60713e-05
Pseudomonas stutzeri group	1.55655e-05	1.60694e-05
Tenacibaculum mesophilum	7.0795e-06	1.60437e-05
Desulfovibrio fairfieldensis	1.01781e-05	1.60295e-05
Acidobacterium sp. PMMR2	6.64102e-06	1.60288e-05
Azotobacter	2.56409e-05	1.60242e-05
Campylobacter concisus	8.18832e-06	1.60178e-05
Francisella sp. FSC1006	2.09916e-05	1.60101e-05
Flavobacterium antarcticum	5.75751e-06	1.59924e-05
Alteromonas macleodii	9.93475e-06	1.59727e-05
Desulfovibrio alaskensis	7.09047e-06	1.5948e-05
Amphibacillus jilinensis	6.10202e-06	1.59017e-05
Anaeromyxobacter dehalogenans	8.24598e-06	1.58976e-05
Capnocytophaga sp. oral taxon 338	5.27297e-06	1.58529e-05
Salegentibacter sp. Hel_I_6	5.98145e-06	1.58194e-05
Paenibacillus sp. Soil766	4.52308e-06	1.57969e-05
Brachyspira suanatina	6.15966e-06	1.57925e-05
Gillisia limnaea	7.07068e-06	1.57917e-05
Chryseobacterium sp. ERMR1:04	6.79408e-06	1.57835e-05
Gillisia sp. CAL575	8.09158e-06	1.57749e-05
Hippea sp. KM1	1.62853e-05	1.57696e-05
Paenibacillus sp. Root444D2	7.78991e-06	1.5761e-05
Fictibacillus phosphorivorans	8.3631e-06	1.57557e-05
Brochothrix thermosphacta	2.43934e-05	1.57383e-05
Carnobacterium pleistocenium	2.04564e-05	1.56951e-05
Smithella sp. SC_K08D17	7.8191e-06	1.56885e-05
Veillonella parvula	1.27786e-05	1.56724e-05
Thermaerobacter subterraneus	8.9306e-06	1.56326e-05
Desulfovibrio putealis	9.92034e-06	1.56201e-05
Cupriavidus metallidurans	3.89138e-06	1.56139e-05
Bacillus sp. 72	4.95574e-06	1.5613e-05
Desulfonatronum lacustre	7.14806e-06	1.55908e-05
Caldicellulosiruptor obsidiansis	4.51512e-06	1.55686e-05
Aminobacterium mobile	5.10844e-06	1.55395e-05
Gordonia rhizosphera	6.44166e-06	1.55363e-05
Alicyclobacillus ferrooxydans	5.78736e-06	1.55235e-05
Arthrobacter sp. IHBB 11108	5.7309e-06	1.54948e-05
Mangrovimonas sp. ST2L12	6.99811e-06	1.5471e-05
Paenibacillus sp. HW567	8.07867e-06	1.54416e-05
Skermanella stibiiresistens	1.12591e-05	1.54227e-05
Leuconostoc citreum	8.43445e-06	1.54172e-05
Labrenzia aggregata	9.68726e-06	1.53896e-05
Paenibacillus sp. OSY-SE	9.17384e-06	1.53881e-05
Oenococcus oeni	9.98592e-06	1.5369e-05
Elizabethkingia miricola	8.58767e-06	1.53526e-05
Oceanobacillus sp. S5	7.36117e-06	1.53305e-05
Kordia jejudonensis	5.33278e-06	1.5318e-05
Paenibacillus sp. Aloe-11	4.80199e-06	1.53159e-05
Comamonas testosteroni	1.87414e-05	1.5313e-05
Desulfovibrio magneticus	3.8005e-06	1.53116e-05
Bacillus sp. FJAT-25547	1.38136e-05	1.53062e-05
Salegentibacter mishustinae	3.88019e-06	1.52928e-05
Flavobacterium columnare	5.0556e-06	1.52782e-05
Clostridium sp. JC272	7.63427e-06	1.52673e-05
Weissella confusa	3.30638e-05	1.52664e-05
Paenibacillus alginolyticus	4.25196e-06	1.52355e-05
Anaerococcus obesiensis	9.84328e-06	1.52302e-05
Tenacibaculum dicentrarchi	6.10481e-06	1.51934e-05
Algoriphagus sp. M8-2	1.09605e-05	1.51889e-05
Francisella tularensis	5.93586e-06	1.51837e-05
Mycobacterium austroafricanum	1.85268e-05	1.5172e-05
Variovorax sp. WDL1	1.42055e-05	1.51664e-05
Geobacter anodireducens	6.29521e-06	1.51643e-05
Bacillus sp. 1NLA3E	7.12615e-06	1.51469e-05
Paenibacillus sp. FSL H7-0737	1.10962e-05	1.51367e-05
Cellulophaga algicola	5.39401e-06	1.51343e-05
Bacillus nealsonii	6.85129e-06	1.50943e-05
Leptospirillum sp. Group III	1.81639e-05	1.50883e-05
Vitreoscilla sp. SN6	1.55224e-05	1.50706e-05
Gracilibacillus sp. Awa-1	1.29944e-05	1.50588e-05
Olleya sp. VCSM12	5.44591e-06	1.50508e-05
Bacillus timonensis	1.02659e-05	1.49743e-05
Leifsonia xyli	2.87777e-06	1.49736e-05
Flavobacterium aquatile	6.03311e-06	1.4945e-05
Capnocytophaga sp. oral taxon 336	4.11735e-06	1.49389e-05
Fusobacterium russii	6.87637e-06	1.49346e-05
Bacillus firmus	7.14564e-06	1.49343e-05
Salisaeta longa	8.63316e-06	1.48375e-05
Silvibacterium bohemicum	4.931e-06	1.4824e-05
Synechococcus sp. PCC 6312	1.41819e-05	1.47998e-05
Endozoicomonas montiporae	6.03467e-06	1.47756e-05
Acinetobacter sp. CIP 101966	2.62613e-05	1.47602e-05
Anaeromyxobacter sp. Fw109-5	6.90509e-06	1.47289e-05
Halanaerobium sp. T82-1	4.31064e-06	1.47032e-05
Caldicellulosiruptor sp. F32	7.41986e-06	1.46727e-05
Maribacter sp. HTCC2170	3.9681e-06	1.46629e-05
Nonlabens marinus	9.57215e-06	1.46544e-05
Hahella chejuensis	6.1293e-06	1.46182e-05
Bacillus sp. UNC438CL73TsuS30	6.58542e-06	1.46149e-05
Klebsiella oxytoca	1.28272e-05	1.45956e-05
Brachyspira innocens	9.82302e-06	1.45783e-05
Ralstonia mannitolilytica	1.93242e-05	1.45512e-05
Myroides marinus	4.34257e-06	1.45392e-05
Parascardovia denticolens	1.0748e-05	1.45391e-05
Psychroserpens damuponensis	7.25024e-06	1.45363e-05
Sandaracinus amylolyticus	6.14529e-06	1.45127e-05
Lacinutrix mariniflava	4.30224e-06	1.45075e-05
Geobacillus caldoxylosilyticus	5.59871e-06	1.44758e-05
Desulfurivibrio alkaliphilus	5.25018e-06	1.44566e-05
Chryseobacterium antarcticum	7.31262e-06	1.445e-05
Kiloniella litopenaei	1.26783e-05	1.44418e-05
Caldicellulosiruptor bescii	6.52421e-06	1.44353e-05
[Clostridium] indolis	1.02917e-05	1.44103e-05
Sediminibacterium sp. OR43	6.83117e-06	1.44066e-05
Bacillus butanolivorans	2.95338e-05	1.43808e-05
Serratia marcescens	8.43584e-06	1.43699e-05
Gramella echinicola	4.04867e-06	1.43641e-05
Anoxybacillus sp. ATCC BAA-2555	7.5262e-06	1.43094e-05
Desulfospira joergensenii	3.81646e-06	1.43088e-05
Brachyspira alvinipulli	4.33898e-06	1.4285e-05
Niveispirillum irakense	7.63503e-06	1.42709e-05
Bacillus sp. MSP5.4	1.43214e-05	1.42609e-05
Eubacterium saphenum	6.90379e-06	1.4243e-05
Lactobacillus aviarius	5.63788e-06	1.42018e-05
Pediococcus pentosaceus	1.87613e-05	1.41829e-05
Methylobacter whittenburyi	9.41138e-06	1.41788e-05
Sulfurospirillum arsenophilum	4.50153e-06	1.41744e-05
Hymenobacter sp. AT01-02	3.03557e-06	1.41614e-05
Saccharibacillus kuerlensis	6.83355e-06	1.41557e-05
Aphanizomenon flos-aquae	5.71473e-06	1.41416e-05
Paenibacillus graminis	7.82178e-06	1.41378e-05
Flavobacterium sp. B17	8.73955e-06	1.4088e-05
Carnobacterium mobile	1.84865e-05	1.40782e-05
Planktothricoides sp. SR001	1.88495e-05	1.4072e-05
Sutterella sp. KLE1602	2.28266e-05	1.40464e-05
Thiothrix nivea	7.32714e-06	1.40328e-05
Veillonella sp. AS16	4.38063e-06	1.40308e-05
Methanococcus maripaludis	6.06371e-06	1.40212e-05
Pontibacillus litoralis	6.96548e-06	1.39983e-05
Kiloniella spongiae	1.62448e-05	1.39706e-05
Streptococcus parauberis	5.12599e-06	1.39612e-05
Ornithinibacillus californiensis	6.62981e-06	1.39415e-05
Chryseobacterium gregarium	4.87603e-06	1.39321e-05
Hyalangium minutum	6.06617e-06	1.3926e-05
Paenibacillus sp. IHBB 10380	7.53537e-06	1.39252e-05
Thermodesulfatator indicus	4.49264e-06	1.38883e-05
Tetragenococcus muriaticus	1.26009e-05	1.38272e-05
Bifidobacterium callitrichos	1.15497e-05	1.37802e-05
Paenibacillus sp. J14	5.80365e-06	1.378e-05
Microcoleus sp. PCC 7113	9.34292e-06	1.37798e-05
Pantoea ananatis	1.47691e-05	1.37749e-05
Fodinicurvata fenggangensis	1.05091e-05	1.37626e-05
Streptococcus sanguinis	7.10588e-06	1.37522e-05
Virgibacillus halodenitrificans	1.55655e-05	1.37505e-05
Calditerricola satsumensis	2.69109e-06	1.37338e-05
Paenibacillus sanguinis	7.01297e-06	1.37184e-05
Streptococcus sp. 263_SSPC	9.03904e-06	1.37167e-05
Veillonella sp. oral taxon 158	2.10525e-05	1.37151e-05
Gemella asaccharolytica	1.03341e-05	1.3708e-05
Marinobacter nanhaiticus	3.93678e-06	1.36957e-05
Bifidobacterium angulatum	4.68185e-06	1.36835e-05
Oceanobacillus picturae	8.32961e-06	1.3678e-05
Leuconostoc lactis	1.65982e-05	1.36708e-05
Oceanibaculum pacificum	1.12321e-05	1.36646e-05
Salinimicrobium terrae	4.42378e-06	1.36629e-05
Mycoplasma penetrans	4.55388e-06	1.36622e-05
Geovibrio sp. L21-Ace-BES	1.06015e-05	1.36473e-05
Vitellibacter vladivostokensis	8.1963e-06	1.3637e-05
Persicobacter sp. CCB-QB2	6.54698e-06	1.36327e-05
Flexibacter litoralis	9.56703e-06	1.36272e-05
Maribacter forsetii	1.03252e-05	1.35902e-05
Holospora obtusa	1.70172e-05	1.35605e-05
Geobacter sp. M21	1.07245e-05	1.35548e-05
Methanococcoides methylutens	4.32179e-06	1.35524e-05
Azospirillum halopraeferens	1.14404e-05	1.35376e-05
Lysinibacillus sp. F5	1.37805e-05	1.35245e-05
Aequorivita sublithincola	6.85908e-06	1.35171e-05
Capnocytophaga sp. oral taxon 323	4.95147e-06	1.35085e-05
[Pasteurella] pneumotropica	1.8292e-05	1.34958e-05
Xanthomonas campestris	3.1074e-06	1.34918e-05
Lysinibacillus manganicus	6.56579e-06	1.34842e-05
Slackia exigua	7.13724e-06	1.34823e-05
Paenibacillus sp. Root52	1.36538e-05	1.34821e-05
Gillisia sp. Hel_I_29	5.384e-06	1.34803e-05
Chryseobacterium sp. OV259	1.50046e-05	1.34774e-05
Haliea salexigens	9.294e-06	1.34623e-05
Thalassomonas viridans	1.16196e-05	1.34475e-05
Desulfonauticus sp. 38_4375	1.05685e-05	1.34358e-05
Acinetobacter sp. MDS7A	2.13466e-05	1.34301e-05
Solirubrobacter sp. URHD0082	1.92763e-05	1.33905e-05
Sporolactobacillus laevolacticus	7.74095e-06	1.33795e-05
Helicobacter pylori	6.29694e-06	1.33774e-05
Lysinibacillus contaminans	1.08434e-05	1.33632e-05
Haematospirillum jordaniae	1.53563e-05	1.33129e-05
Parabacteroides sp. 2_1_7	7.58284e-06	1.33105e-05
Flavobacterium sp. F52	7.48387e-06	1.33073e-05
Bacillus gobiensis	5.61203e-06	1.33062e-05
Bacillus sp. UNC322MFChir4.1	6.69253e-06	1.33042e-05
Myroides profundi	6.16961e-06	1.33e-05
Thermincola potens	6.65958e-06	1.32927e-05
Rhodomicrobium vannielii	6.29985e-06	1.3288e-05
Geobacillus sp. A8	1.70418e-05	1.32658e-05
Gemmatimonas sp. SG8_38_2	2.5819e-06	1.31903e-05
Desulfobulbus mediterraneus	6.7205e-06	1.31667e-05
Paenibacillus lactis	1.11577e-05	1.31623e-05
Campylobacter curvus	6.59225e-06	1.31618e-05
Bacillus sp. GeD10	2.43852e-05	1.31579e-05
Thermovibrio ammonificans	8.68001e-06	1.31562e-05
Balneola vulgaris	4.74669e-06	1.31439e-05
Lactobacillus pentosus	2.39344e-05	1.31353e-05
Sporosarcina sp. HYO08	9.75701e-06	1.31349e-05
Brevibacillus sp. CF112	1.33964e-05	1.31286e-05
Mangrovimonas yunxiaonensis	5.61428e-06	1.31221e-05
Fodinicurvata sediminis	1.1754e-05	1.31043e-05
Desulfovibrio sp. L21-Syr-AB	5.9442e-06	1.31026e-05
Enterococcus phoeniculicola	6.64089e-06	1.31002e-05
Methanobacterium sp. SMA-27	1.46377e-05	1.30561e-05
Thiobacillus denitrificans	9.2084e-06	1.30506e-05
Thalassobacillus sp. TM-1	3.67792e-06	1.30386e-05
Dokdonia sp. PRO95	5.6842e-06	1.3029e-05
[truncated: 5,108 more rows]
