# Supplementary material for: Monensin Alters the Functional and Metabolomic Profile of Rumen Microbiota in Beef Cattle
Source: Animals (Basel). 2018 Nov 17;8(11):211. doi: 10.3390/ani8110211 (PMC6262558; doi:10.3390/ani8110211)
Supplement: Supplementary file 1 [file animals-08-00211-s001.zip › Supplementary Table S5.xlsx]

## Sheet: Sheet1
Identified metabolites
Average Rt(min)	Average Mz	Metabolite name	Adduct ion name	Formula
2.55	86.0963	Piperidine	[M+H]+	C5H11N
1.74	89.1072	Putrescine	[M+H]+	C4H12N2
2.03	90.0548	Alanine	[M+H]+	C3H7NO2
4.78	96.0443	2-Hydroxypyridine	[M+H]+	C5H5NO
2.43	102.128	1-Hexylamine	[M+H]+	C6H15N
1.74	103.123	Cadaverine	[M+H]+	C5H14N2
1.96	104.071	N,N-Dimethylglycine	[M+H]+	C4H9NO2
1.91	104.107	Choline	[M]+	C5H14NO
8.9	105.07	2,3-Diaminopropionate	[M+H]+	C3H8N2O2
1.99	109.076	PHENYLHYDRAZINE	[M+H]+	C6H8N2
1.98	110.06	4-AMINOPHENOL	[M+H]+	C6H7NO
2.04	113.034	Uracil	[M+H]+	C4H4N2O2
1.99	116.071	Proline	[M+H]+	C5H9NO2
2.72	118.065	Indole	[M+H]+	C8H7N
1.98	118.086	Valine	[M+H]+	C5H11NO2
7.75	123.044	BENZOIC ACID	[M+H]+	C7H6O2
2.02	124.039	NICOTINIC ACID	[M+H]+	C6H5NO2
1.74	131.129	Agmatine	[M+H]+	C5H14N4
8.91	132.081	Creatine	[M+H]+	C4H9N3O2
2.54	132.102	Isoleucine	[M+H]+	C6H13NO2
8.9	133.065	trans-Cinnamaldehyde	[M+H]+	C9H8O
2	136.065	Adenine	[M+H]+	C5H5N5
2.46	137.046	HYPOXANTHINE	[M+H]+	C5H4N4O
5.57	138.055	Anthranilic acid	[M+H]+	C7H7NO2
2.52	138.091	Tyramine	[M+H]+	C8H11NO
4.39	143.034	cis,cis-Muconic acid	[M+H]+	C6H6O4
2.72	144.048	4-Methyl-5-thiazoleethanol	[M+H]+	C6H9NOS
6.58	146.06	3-Formylindole	[M+H]+	C9H7NO
3.23	146.118	(S)-3-Amino-5-methylhexanoic acid	[M+H]+	C7H15NO2
1.73	146.165	Spermidine	[M+H]+	C7H19N3
1.74	147.113	Lysine	[M+H]+	C6H14N2O2
2.02	148.062	Glutamic acid	[M+H]+	C5H9NO4
2.53	152.057	Guanine	[M+H]+	C5H5N5O
1.73	155.154	Histidine	[M+H]+	C6H9N3O2
2.55	160.097	N-Isovaleroylglycine	[M+H]+	C7H13NO3
24.27	161.133	(3S)-3,7-diaminoheptanoic acid	[M+H]+	C7H16N2O2
5.86	162.055	1H-indole-3-carboxylic acid	[M+H]+	C9H7NO2
6.39	164.071	L-β-homomethionine	[M+H]+	C6H13NO2S
2.73	166.087	L-(-)-Phenylalanine	[M+H]+	C9H11NO2
5.68	166.123	Pseudoephedrine	[M+H]+	C10H15NO
4.79	166.123	Ephedrine	[M+H]+	C10H15NO
1.99	168.066	6-ethoxypyridine-3-carboxylic acid	[M+H]+	C8H9NO3
5.28	169.076	"9H-PYRIDO[3,4-B]INDOLE"	[M+H]+	C11H8N2
2.64	169.097	Pyridoxamine	[M+H]+	C8H12N2O2
2.02	170.083	Pyridoxine	[M+H]+	C8H11NO3
7.03	173.06	Menadione	[M+H]+	C11H8O2
2.58	173.11	Tryptoline	[M+H]+	C11H12N2
1.77	175.119	L-Arginine	[M+H]+	C6H14N4O2
2.95	175.123	Arginine	[M+H]+	C6H14N4O2
2.56	177.102	4,4-dimethyl-2-(pyridin-3-yl)-4,5-dihydrooxazole	[M+H]+	C10H12N2O
4.98	180.066	N-BENZOYL(D5) GLYCINE	[M+H]+	C9H9NO3
2.01	180.102	5-BUTYLPYRIDINE-2-CARBOXYLIC ACID	[M+H]+	C10H13NO2
3.12	182.081	L-Tyrosine	[M+H]+	C9H11NO3
2.54	184.061	4-Pyridoxic acid	[M+H]+	C8H9NO4
7.91	185.117	"1-methyl-3,4-dihydro-2H-pyrido[3,4-b]indole"	[M+H]+	C12H12N2
4.43	190.05	Kynurenic acid	[M+H]+	C10H7NO3
1.78	191.077	7-Methoxy-4-methylcoumarin	[M+H]+	C11H10O3
6.04	192.066	5-Hydroxyindole-3-acetic acid	[M+H]+	C10H9NO3
2.55	196.098	L-beta-Homotyrosine	[M+H]+	C10H13NO3
7.63	199.076	3-but-2-ynylisochromen-1-one	[M+H]+	C13H10O2
5.56	199.087	Cymoxanil	[M+H]+	C7H10N4O3
7.01	202.078	Simazine	[M+H]+	C7H12ClN5
2.72	204.104	3-(1H-indol-3-yl)-2-methylpropanoic acid	[M+H]+	C12H13NO2
2.02	204.123	O-Acetyl-L-carnitine	[M+H]+	C9H18NO4
3.53	205.097	L-Tryptophan	[M+H]+	C11H12N2O2
12.76	205.195	(-)-alpha-Copaene	[M+H]+	C15H24
2.04	206.118	"6,7-dimethoxy-1-methyl-3,4-dihydroisoquinoline"	[M+H]+	C12H15NO2
5.64	208.133	3-phenyl-2-(trimethylazaniumyl)propanoate	[M+H]+	C12H17NO2
4.27	209.129	Nicotinoylcholine	[M]+	C11H17N2O2
6.53	213.064	1-[2-(Trifluoromethyl)phenyl]imidazole25371-96-4	[M+H]+	C10H7F3N2
2.01	215.139	d-Desthiobiotin	[M+H]+	C10H18N2O3
6.18	218.081	[2-(1H-indol-3-yl)-2-oxoethyl] acetate	[M+H]+	C12H11NO3
7.44	218.118	Securinine	[M+H]+	C13H15NO2
2.56	219.113	N-acetyl-5-hydroxytryptamine	[M+H]+	C12H14N2O2
2.58	220.107	1-(m-tolyl)isoquinoline	[M+H]+	C16H13N
2.97	220.118	D-(+)-Pantothenic acid	[M+H]+	C9H17NO5
7.03	221.096	5-Hydroxy-L-tryptophan145224-90-4	[M+H]+	C11H12N2O3
7	225.091	Flavanone	[M+H]+	C15H12O2
7.64	227.071	"8-prop-1-en-2-ylfuro[2,3-h]chromen-2-one"	[M+H]+	C14H10O3
5.56	227.082	"1-methyl-9H-pyrido[3,4-b]indole-3-carboxylic acid"	[M+H]+	C13H10N2O2
11.35	230.118	"2,2-dimethyl-4,10-dihydro-3H-pyrano[2,3-b]quinolin-5-one"	[M+H]+	C14H15NO2
7.4	235.094	Pyrenochaetic acid A	[M+H]+	C13H14O4
2.01	237.16	Procaine (Novocaine) aka 2-(diethylamino)ethyl 4-aminobenzoate	[M+H]+	C13H20N2O2
2.71	240.102	"2-(3-Methyl-5-oxo-2,5-dihydro-furan-2-ylmethyl)-quinoline"	[M+H]+	C15H13NO2
2.54	240.123	BUPROPION HYDROCHLORIDE	[M+H]+	C13H18ClNO
2.55	242.103	O6-Benzylguanine	[M+H]+	C12H11N5O
5.49	244.097	Cytidine	[M+H]+	C9H13N3O5
4.83	245.09	Biotin (Vitamin B7)	[M+H]+	C10H16N2O3S
6.8	245.129	"1H-Imidazole-5-carboxylic acid, 1-(1-phenylethyl)-, ethyl ester, (R)- [CAS]"	[M+H]+	C14H16N2O2
7.45	246.113	"2,3-Dihydro-6-Methoxy-4-Methyl-2-Hydroxyethylfuro[3,2-c]quinoline"	[M+H]+	C14H15NO3
2.59	247.136	9_10-alpha-Epoxy-eremanthin	[M+H]+	C15H18O3
6.75	249.124	6-Hydroxymelatonin	[M+H]+	C13H16N2O3
2.55	251.15	1,3-Dipropyl-7-methylxanthine	[M+H]+	C12H18N4O2
5.01	252.025	2-[(4,6-diamino-1,3,5-triazin-2-yl)thio]-Ethanesulfonic acid	[M+H]+	C5H9N5O3S2
6.83	253.099	Chlorhexidine55-56-1	[M+H]+	C22H30Cl2N10
7.38	253.141	"4-(4-Methyl-pent-3-enyl)-cyclohex-4-ene-1,2-dicarboxylic acid"	[M+H]+	C14H20O4
10.46	254.077	(9-oxo-10(9H)-acridinyl)acetic acid	[M+H]+	C15H11NO3
7.63	255.066	Daidzein	[M+H]+	C15H10O4
2.06	255.095	3',4',5',6'-tetrahydro-6',6'-dimethyl-spiro[isobenzofuran-1(3H),2'-[2H]pyran]-3-one M+Na	[M+H]+	C14H16O3
7.79	257.081	"2',4,4'-Trihydroxychalcone"	[M+H]+	C15H12O4
2.54	258.134	cyclo(Trp-Ala)	[M+H]+	C14H15N3O2
7.74	259.097	2,2-dimethyl-5-oxo-2,3,4,5-tetrahydroindeno[1,2-b]pyran-6-carboxylic acid	[M+H]+	C15H14O4
8.15	263.082	3-(3-oxo-1H-indol-2-ylidene)-1H-indol-2-one	[M+H]+	C16H10N2O2
4.29	264.132	"3,3,5-trimethyl-11H-pyrano[3,2-a]carbazole"	[M+H]+	C18H17NO
2.07	265.066	2',2'-Difluoro-2'-deoxyuridine	[M+H]+	C9H10F2N2O5
2.01	266.137	Thiamine	[M+H]+	C12H17N4OS
10.77	269.081	Formononetin	[M+H]+	C16H12O4
8.78	271.06	Genistein	[M+H]+	C15H10O5
2.55	271.129	3-hydroxy-1-(4-hydroxyphenyl)-5-phenylpentan-1-one	[M+H]+	C17H18O3
2.02	271.165	19-Norandrosta-4,9-dien-3,17-dione	[M+H]+	C18H22O2
6.04	272.092	5,8-dimethoxy-7-hydroxy-1-methyl-4-azafluoren-9-one	[M+H]+	C15H13NO4
6.69	275.092	2-(1,3-Benzodioxol-5-yl)ethyl-4-methoxy-2H-pyranone	[M+H]+	C15H14O5
2.94	277.116	Pentalenolactone	[M+H]+	C15H16O5
10.87	279.077	"3-Methyl-6-[3-(trifluoromethyl)phenyl]-1,2,4-triazolo[4,3-b]pyridazine"	[M+H]+	C13H9F3N4
2.56	281.15	L-Histidine	[M+H]+	C6H9N3O2
7.83	285.076	Biochanin A	[M+H]+	C16H12O5
7.79	287.055	Kaempferol	[M+H]+	C15H10O6
5.14	287.139	"1-(5-methoxy-1H-indol-3-yl)-2-piperidin-1-ylethane-1,2-dione"	[M+H]+	C16H18N2O3
2.02	287.16	6-KETOESTRADIOL	[M+H]+	C18H22O3
24.59	287.238	Retinol	[M+H]+	C20H30O
2.02	288.127	N-[(1S)-1-(4-methoxy-6-oxopyran-2-yl)-2-phenylethyl]acetamide	[M+H]+	C16H17NO4
22.86	288.175	"4-(dibenzo[1,2-a:1',2'-e][7]annulen-11-ylidene)-1-methylpiperidine"	[M+H]+	C21H21N
2.02	294.155	Ondansetron aka "9-methyl-3-[(2-methylimidazol-1-yl)methyl]-2,3-dihydro-1H-carbazol-4-one"	[M+H]+	C18H19N3O
2.01	296.152	SUMATRIPTAN SUCCINATE	[M+H]+	C14H21N3O2S
7.92	298.072	TYRPHOSTIN	[M+H]+	C16H11NO5
9.1	298.105	5'-S-Methylthioadenosine	[M+H]+	C11H15N5O3S
2.01	299.16	"7-[(2E)-3,7-dimethylocta-2,6-dienoxy]chromen-2-one"	[M+H]+	C19H22O3
2.01	300.144	(2-(4,4-dimethyl-4,5-dihydrooxazol-2-yl)-5-fluorophenyl)(phenyl)methanol	[M+H]+	C18H18FNO2
2.9	302.139	N-cyclopentyl-2-(4-methyl-2-oxochromen-7-yl)oxyacetamide	[M+H]+	C17H19NO4
1.81	303.155	NORDIHYDROGUAIARETIC ACID	[M+H]+	C18H22O4
6.77	304.202	Vildagliptin (LAF-237)	[M+H]+	C17H25N3O2
2.57	306.134	"N-[3-(3-cyanopyrazolo[1,5-a]pyrimidin-7-yl)phenyl]-N-ethylacetamide"	[M+H]+	C17H15N5O
7.82	307.058	4'-Methylgenistein (Biochanin A) M+Na	[M+H]+	C16H12O5
1.76	309.166	"Phenylbutazone (Butazolidin, Butatron)"	[M+H]+	C19H20N2O2
6.95	309.218	Oxybuprocaine	[M+H]+	C17H28N2O3
9.27	313.107	Tri-O-methylgenistein	[M+H]+	C18H16O5
5.58	321.131	5'-(N-Cyclopropyl)carboxamidoadenosine50908-62-8	[M+H]+	C13H16N6O4
2.55	324.144	"N-(8-hydroxy-6-methoxy-2-phenyl-4,4a,6,7,8,8a-hexahydropyrano[3,2-d][1,3]dioxin-7-yl)acetamide"	[M+H]+	C16H21NO6
8.77	329.147	"1-[2-(6,7-dimethoxy-3,4-dihydro-1H-isoquinolin-2-yl)-2-oxoethyl]pyridin-2-one"	[M+H]+	C18H20N2O4
2.43	330.06	3',5'-Cyclic AMP	[M+H]+	C10H12N5O6P
5.54	331.129	1-[2-(2-oxochromen-7-yl)oxyacetyl]piperidine-4-carboxamide	[M+H]+	C17H18N2O5
12.3	331.185	2-(3-(8-hydroxyoctyl)phenoxy)-2-methylpropanoic acid M+Na	[M+H]+	C18H28O4
6.79	334.129	5,6-dihydro-6-hydroxy-1-[(2E)-1-oxo-3-(3,4,5-trimethoxyphenyl)-2-propen-1-yl]-2(1H)-Pyridinone	[M+H]+	C17H19NO6
7.28	335.124	Isopongaflavone	[M+H]+	C21H18O4
2.04	336.167	N6-CYCLOPENTYLADENOSINE	[M+H]+	C15H21N5O4
2.56	339.155	"9-[(2E)-3,7-dimethylocta-2,6-dienoxy]furo[3,2-g]chromen-7-one"	[M+H]+	C21H22O4
7.03	341.23	TRANS-DIHYDROLISURIDE	[M+H]+	C20H28N4O
7.05	343.202	Tetraisopropyl pyrophosphoramide513-00-8	[M+H]+	C12H32N4O3P2
2.53	344.134	N6-PHENYLADENOSINE	[M+H]+	C16H17N5O4
2.78	345.07	Thiamine monophosphate	[M+H]+	C12H18N4O4PS
24.59	345.241	"(6S,8R,9S,10R,13S,14S,17R)-17-acetyl-17-hydroxy-6,10,13-trimethyl-2,6,7,8,9,11,12,14,15,16-decahydro-1H-cyclopenta[a]phenanthren-3-one"	[M+H]+	C22H32O3
1.9	346.094	Ethyl 1-cyclopropyl-6,7-difluoro-8-methoxy-4-oxo-1,4-dihydro-3-quinolinecarboxylate M+Na	[M+H]+	C16H15F2NO4
6.77	348.144	Evoxine	[M+H]+	C18H21NO6
2.04	350.179	"2-[6-(cyclohexylamino)purin-9-yl]-5-(hydroxymethyl)oxolane-3,4-diol"	[M+H]+	C16H23N5O4
7.02	353.1	N4-Acetylsulfadimethoxine	[M+H]+	C14H16N4O5S
2.11	359.086	Epicoccolide B	[M+H]+	C18H14O8
2.55	365.178	"(6,7-dimethoxy-3,4-dihydro-1H-isoquinolin-2-yl)-(2,3-dimethyl-1H-indol-5-yl)methanone"	[M+H]+	C22H24N2O3
4.79	366.17	Isopentenyl-Adenine-7-glucoside	[M+H]+	C16H23N5O5
6.77	375.082	7-Hydroxy-2-phenoxy-3-(2-carboxybenzyl)chromone	[M+H]+	C22H14O6
7.4	376.249	"S-4-benzyl-3-((S)-3-hydroxy-2,2-dimethyloctanoyl) -5,5-dimethyloxazolidin-2-one"	[M+H]+	C22H33NO4
9.67	387.132	2-(2-oxo-4-phenylchromen-7-yl)oxy-N-(pyridin-2-ylmethyl)acetamide	[M+H]+	C23H18N2O4
7.25	387.192	1-[2-(4-butyl-2-oxochromen-7-yl)oxyacetyl]piperidine-4-carboxamide	[M+H]+	C21H26N2O5
8.84	395.082	Daphnoretine Acetate	[M+H]+	C21H14O8
2.05	400.19	"7-[1-[(4aS,8aS)-4a-hydroxy-1,3,4,5,6,7,8,8a-octahydroisoquinolin-2-yl]-1-oxopropan-2-yl]oxy-4,8-dimethylchromen-2-one"	[M+H]+	C23H29NO5
2.55	426.197	"N-[2-(3,4-dimethoxyphenyl)ethyl]-2-(3,4,7-trimethyl-2-oxochromen-5-yl)oxyacetamide"	[M+H]+	C24H27NO6
24.4	429.315	17ALPHA-HYDROXYPROGESTERONE CAPROATE630-56-8	[M+H]+	C27H40O4
7.56	430.232	4-[[[2-(4-butyl-8-methyl-2-oxochromen-7-yl)oxyacetyl]amino]methyl]cyclohexane-1-carboxylic acid	[M+H]+	C24H31NO6
6.97	437.205	"2-[(8,8-dimethyl-2-oxo-4-propyl-9,10-dihydropyrano[2,3-h]chromen-5-yl)oxy]-N-(pyridin-2-ylmethyl)acetamide"	[M+H]+	C25H28N2O5
7.1	445.234	"2-[(4-ethyl-8,8-dimethyl-2-oxo-9,10-dihydropyrano[2,3-h]chromen-5-yl)oxy]-N-(2-morpholin-4-ylethyl)acetamide"	[M+H]+	C24H32N2O6
7.63	448.306	8'-Apocapsorbinal	[M+H]+	C30H40O3
7.49	449.087	2-benzamido-3-[(2-benzamido-2-carboxyethyl)disulfanyl]propanoic acid	[M+H]+	C20H20N2O6S2
24.73	462.313	Methyl hydroxy-3,4-dehydro-apo-8'-lycopenate	[M+H]+	C31H42O3
5.84	468.245	10-Dehydroxy-10-(N-epsilon-caprolactam-3-yl)-amino-demecolceine	[M+H]+	C26H33N3O5
6.33	473.238	Linagliptin (BI-1356)	[M+H]+	C25H28N8O2
4.58	165.079	L-phenylalanine	[M+H]+	C9H11NO2
7.75	490.317	Oxysporidinone	[M+H]+	C28H43NO6
7.96	513.271	1-Alaninechlamydocin	[M+H]+	C27H36N4O6
2.05	89.0245	Lactic acid	[M-H]-	C3H6O3
7.88	94.0298	3-Hydroxypyridine	[M-H]-	C5H5NO
1.92	101.024	2-Oxobutyric acid	[M-H]-	C4H6O3
1.97	105.019	Glyceric acid	[M-H]-	C3H6O4
2.49	108.02	Hypotaurine	[M-H]-	C2H7NO2S
6.84	109.03	Cathecol	[M-H]-	C6H6O2
2.02	122.025	Isonicotinate	[M-H]-	C6H5NO2
2.01	128.035	L-5-Oxoproline	[M-H]-	C5H7NO3
6.31	131.071	2-Hydroxyisocaproic acid	[M-H]-	C6H12O3
7.74	135.045	Caffeic acid	[M-H]-	C9H8O4
4.99	137.024	P-HYDROXYBENZOIC ACID	[M-H]-	C7H6O3
8.05	137.024	Salicylic acid	[M-H]-	C7H6O3
5.12	145.051	2-Methylglutaric acid	[M-H]-	C6H10O4
2.53	147.03	Citramalate	[M-H]-	C5H8O5
6.72	147.045	trans-Cinnamate	[M-H]-	C9H8O2
1.95	149.045	D-(-)-Arabinose	[M-H]-	C5H10O5
8.87	149.061	(S)-(+)-2-Phenylpropionic acid	[M-H]-	C9H10O2
2	151.026	Oxypurinol	[M-H]-	C5H4N4O2
6.85	153.019	3,4-DIHYDROXYBENZOIC ACID	[M-H]-	C7H6O4
6.08	158.082	N-Isovaleroylglycine	[M-H]-	C7H13NO3
6.18	159.066	PIMELIC ACID	[M-H]-	C7H12O4
4.99	160.04	1H-indole-3-carboxylic acid	[M-H]-	C9H7NO2
6.29	163.042	trans-p-Hydroxycinnamic acid	[M-H]-	C9H8O3
1.93	165.04	3-Methylxanthine	[M-H]-	C6H6N4O2
2.02	166.051	Pyridoxal	[M-H]-	C8H9NO3
6.64	167.035	Homogenentisic acid	[M-H]-	C8H8O4
2	173.023	cis-Aconitate	[M-H]-	C6H6O6
6.35	173.082	SUBERIC ACID	[M-H]-	C8H14O4
5.14	175.061	2-Isopropylmalic acid	[M-H]-	C7H12O5
8.02	175.076	Canavanine	[M-H]-	C5H12N4O3
2.02	177.04	D(-)-Gulono-gamma-lactone	[M-H]-	C6H10O6
1.93	179.056	D-(+)-Galactose	[M-H]-	C6H12O6
6.36	182.046	4-Pyridoxate	[M-H]-	C8H9NO4
7.1	186.114	3-(2-amino-2-oxoethyl)-5-methyl-hexanoic acid	[M-H]-	C9H17NO3
7.14	187.098	3-Isobutylglutaric acid	[M-H]-	C9H16O4
6.03	190.051	5-Hydroxyindoleacetic acid	[M-H]-	C10H9NO3
2.49	191.019	Citrate	[M-H]-	C6H8O7
6.45	192.066	PHENATURIC ACID	[M-H]-	C10H11NO3
4.99	196.061	3,4-Dihydroxy-L-phenylalanine	[M-H]-	C9H11NO4
6.31	199.059	N,N-Dimethyl-N'-phenylsulfamide	[M-H]-	C8H12N2O2S
6.21	217.108	L-beta-homotryptophan-HCl	[M-H]-	C12H14N2O2
24.1	221.155	3-(8-hydroxyoctyl)phenol	[M-H]-	C14H22O2
6.66	239.108	L-Homocarnosine	[M-H]-	C10H16N4O3
7.61	253.051	Chrysin	[M-H]-	C15H10O4
7.6	259.097	2-(5-formyl-3,4-dihydro-2,2-dimethyl-2H-pyran-6-yl)-Benzoic acid	[M-H]-	C15H16O4
7.34	263.129	(+/-)-cis,trans-abscisic acid	[M-H]-	C15H20O4
7.46	265.144	Lauryl sulfate	[M-H]-	C12H26O4S
7.01	269.046	Apigenin	[M-H]-	C15H10O5
23.26	279.236	Linoleic acid	[M-H]-	C18H32O2
2.52	283.068	Xanthosine	[M-H]-	C10H12N4O6
7.76	285.04	Luteolin	[M-H]-	C15H10O6
7.14	294.057	1-cyclopropyl-6,7-difluoro-1,4-dihydro-8-methoxy-4-oxo-3-Quinoline-3-carboxylic acid	[M-H]-	C14H11F2NO4
23.91	295.228	13-HODE	[M-H]-	C18H32O3
23.48	306.207	Dihydrocapsaicin	[M-H]-	C18H29NO3
2	308.098	N-Acetylneuraminate	[M-H]-	C11H19NO9
23.45	309.207	13-HpOTrE(r)	[M-H]-	C18H30O4
6.77	315.087	Eriodictyol 7,3'-dimethyl ether	[M-H]-	C17H16O6
23.42	319.228	11,12-EET	[M-H]-	C20H32O3
5.76	325.14	Licarin A	[M-H]-	C20H22O4
5.7	331.15	Gibberellin A4	[M-H]-	C19H24O5
24.21	335.22	8,15-DiHETE	[M-H]-	C20H32O4
23.38	338.987	alpha-D-Glucose-1,6-diphosphate	[M-H]-	C6H14O12P2
5.24	343.082	5,7-dihydroxy-3,6-dimethoxy-2-(4-methoxyphenyl)-4H-chromen-4-one	[M-H]-	C18H16O7
23.47	347.259	2-hydroxy-6-pentadecylbenzoic acid	[M-H]-	C22H36O3
6.89	351.085	N4-Acetylsulfadimethoxine	[M-H]-	C14H16N4O5S
7.72	351.217	LTB4_20-Hydroxy	[M-H]-	C20H32O5
6.82	383.111	S-Adenosyl-L-homocysteine	[M-H]-	C14H20N6O5S
6.7	403.103	5,7-dihydroxy-3,6-dimethoxy-2-(3,4,5-trimethoxyphenyl)-4H-chromen-4-one	[M-H]-	C20H20O9
