# Supplementary figures and images for: Monensin Alters the Functional and Metabolomic Profile of Rumen Microbiota in Beef Cattle
Source: MDPI journal article supplement (doi:10.3390/ani8110211), 2018-11-17

Figure S1. Rarefaction curve of the 8 samples

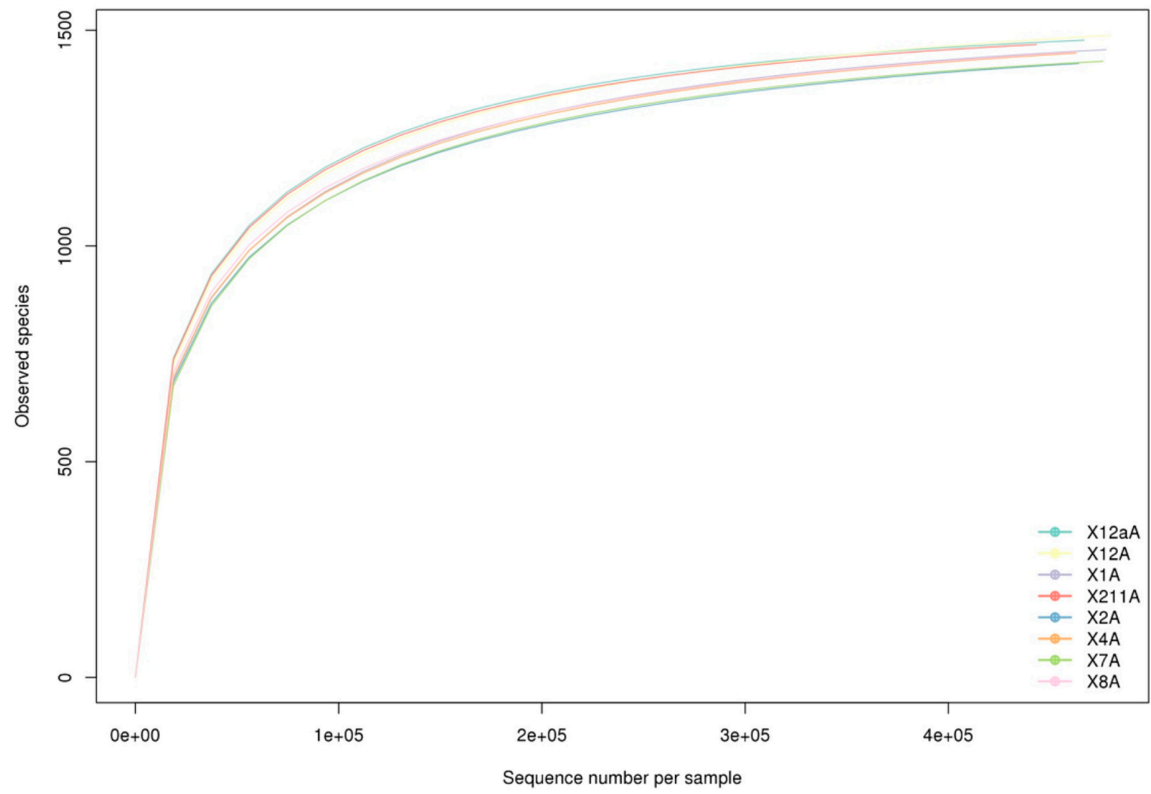

Supplement: s1 [file s1]
